# Supplementary material
Source: publisher figshare collection journal article supplement (https://gsajournals.figshare.com/ndownloader/files/12718214)
Supplement: Supplementary file 1 [file 12718214]

## Sheet: Sheet1
query acc.ver	subject acc.ver	% identity	alignment length	mismatches	gap opens	q. start	q. end	s. start	s. end	evalue	bit score	% positives
41646	WP_060710196.1	94.578	166	9	0	498	1	13	178	1.45e-101	300	96.99
41646	WP_105812643.1	90.419	167	16	0	501	1	8	174	2.34e-96	287	92.81
41646	WP_079864013.1	89.937	159	16	0	477	1	13	171	8.49e-91	273	92.45
41646	WP_046072766.1	89.937	159	16	0	477	1	12	170	8.86e-91	273	92.45
41646	WP_088131300.1	86.628	172	18	2	501	1	34	205	9.2e-91	274	88.95
41646	XP_016022663.1	99.174	121	1	0	495	133	1	121	1.58e-71	220	99.17
41646	NP_001310111.1	67.532	154	50	0	462	1	1	154	5.8e-62	199	78.57
41646	XP_015769081.1	65.409	159	55	0	477	1	3	161	8.06e-62	199	76.1
41646	XP_015755061.1	68.493	146	46	0	462	25	1	146	3.15e-60	194	80.14
41646	XP_020623141.1	56.707	164	66	1	477	1	3	166	1.15e-53	178	74.39
41646	XP_020605513.1	57.233	159	68	0	477	1	3	161	1.57e-53	178	75.47
41646	XP_020605512.1	56.707	164	66	1	477	1	3	166	2.86e-53	177	73.78
41646	XP_020605521.1	56.098	164	67	1	477	1	3	166	9.58e-53	176	74.39
41646	XP_022778185.1	54.375	160	73	0	495	16	1	160	4.09e-52	174	75
41646	XP_020630140.1	55.28	161	69	1	474	1	3	163	2.34e-49	167	73.29
41646	XP_020630220.1	55.195	154	69	0	462	1	1	154	1.18e-48	165	74.03
41646	XP_020630180.1	52.096	167	67	1	462	1	1	167	1.98e-47	161	68.26
41646	XP_020630143.1	50.932	161	77	2	477	1	3	163	1.98e-47	162	70.81
41646	XP_015751145.1	51.534	163	77	1	495	13	1	163	2.21e-42	149	68.71
41646	XP_020630179.1	41.667	192	79	4	477	1	3	194	2.7e-42	149	57.81
41646	XP_015751140.1	50.299	167	81	1	495	1	1	167	1.04e-41	148	68.26
41646	XP_015751142.1	50.299	167	81	1	495	1	1	167	1.06e-41	148	68.26
41646	XP_015751139.1	50.299	167	81	1	495	1	1	167	1.2e-41	148	68.26
41646	XP_015751144.1	50.92	163	78	1	495	13	1	163	1.91e-41	147	68.1
41646	XP_020627712.1	54.167	120	55	0	360	1	3	122	4.18e-41	145	71.67
41646	XP_015751136.1	49.102	167	83	1	495	1	1	167	1.24e-40	145	69.46
41646	XP_015751137.1	49.693	163	80	1	495	13	1	163	1.5e-40	145	68.71
41646	XP_015751138.1	49.693	163	80	1	495	13	1	163	2.36e-40	144	68.71
41646	XP_015759439.1	48.485	165	81	2	495	13	1	165	6.42e-40	143	66.06
41646	XP_015751143.1	49.693	163	80	1	495	13	1	163	7.04e-40	143	68.1
41646	XP_015770397.1	48.485	165	81	2	495	13	1	165	1.24e-39	142	67.27
41646	XP_015757116.1	47.273	165	83	2	495	13	1	165	8.5e-39	140	65.45
41646	XP_022807490.1	50.649	154	71	2	474	13	13	161	1.37e-38	140	68.18
41646	XP_022805203.1	51.333	150	73	0	462	13	1	150	1.99e-38	137	67.33
41646	XP_015751149.1	49.219	128	63	1	390	13	12	139	5.03e-36	132	67.97
41646	XP_001633713.1	48.734	158	80	1	471	1	61	218	3.82e-35	133	62.66
41646	XP_001634522.1	46.541	159	83	2	471	1	5	163	2.09e-31	122	62.89
41646	XP_022807489.1	45.652	138	74	1	495	82	1	137	4.23e-28	110	61.59
41646	XP_020630195.1	55.769	104	46	0	477	166	3	106	1.4e-27	108	74.04
41646	XP_001641514.1	43.226	155	82	2	462	1	1	150	2.35e-24	102	56.77
41646	XP_015780518.1	63.768	69	25	0	207	1	1	69	2.46e-22	95.9	73.91
41646	XP_022810129.1	59.14	93	36	1	444	172	1	93	9.51e-21	91.7	74.19
41646	XP_001634570.1	49.398	83	38	2	297	52	3	82	4.23e-16	78.2	60.24
41646	XP_019628392.1	34.351	131	85	1	438	46	14	143	2.02e-11	69.3	51.91
41646	XP_019637166.1	33.588	131	86	1	438	46	14	143	1.01e-10	67.4	51.91
41646	XP_019640075.1	32.692	156	101	3	462	4	1	155	1.12e-10	67.4	52.56
41646	XP_019640912.1	32.432	148	95	4	453	19	8	153	2.25e-10	66.6	55.41
41646	XP_019616464.1	33.094	139	92	1	450	34	9	146	3.54e-10	65.9	50.36
41646	XP_019616477.1	33.094	139	92	1	450	34	9	146	4.01e-10	65.9	49.64
41646	XP_019640911.1	31.973	147	97	3	453	19	8	153	1.01e-09	64.7	52.38
41646	XP_019646315.1	32.374	139	93	1	450	34	9	146	4.22e-09	63.2	48.2
41646	XP_002603107.1	36.296	135	85	1	450	46	9	142	1.87e-08	61.2	51.11
41646	XP_002603104.1	31.724	145	96	3	453	25	8	151	1.91e-08	62	53.1
41646	XP_002603213.1	31.159	138	94	1	459	46	9	145	2.31e-08	61.2	47.1
41646	XP_015757112.1	48.077	52	25	1	162	13	23	74	3.41e-08	59.3	71.15
41646	XP_002603108.1	31.655	139	94	1	450	34	9	146	6.16e-08	60.1	49.64
41646	XP_002603106.1	31.655	139	94	1	450	34	9	146	8.26e-08	59.7	48.92
41646	XP_002601086.1	33.103	145	94	3	453	25	56	199	1.21e-07	59.7	50.34
41646	XP_002601087.1	33.562	146	92	4	453	25	15	158	1.5e-07	58.9	49.32
41646	XP_019628386.1	31.655	139	94	1	450	34	18	155	1.54e-07	58.9	49.64
41646	XP_002590512.1	31.159	138	94	1	459	46	375	511	1.61e-07	60.1	47.83
41646	WP_105815008.1	32.692	156	102	3	462	1	11	165	4.42e-07	58.2	49.36
41646	XP_002601084.1	32.414	145	95	3	453	25	53	196	1.04e-06	57	50.34
41646	XP_002601088.1	32	150	97	4	453	13	8	155	6.74e-06	54.3	50
41646	XP_022809786.1	50	42	21	0	138	13	38	79	8.94e-06	52.8	78.57
41646	XP_002603110.1	33.824	136	86	3	450	49	9	142	9.18e-06	53.9	50.74
41646	XP_020623190.1	53.659	41	17	1	117	1	57	97	0.000498	47.8	73.17
41646	XP_020623192.1	52.5	40	17	1	123	10	1	40	0.000567	47	75
41654	WP_069800263.1	100	27	0	0	1	81	122	148	2.55e-08	59.7	100
41654	WP_104792830.1	96.296	27	1	0	1	81	122	148	9.28e-08	58.2	100
41656	XP_011276342.1	80.503	159	31	0	1	477	649	807	2.91e-87	288	91.82
41656	XP_020069984.1	80.38	158	31	0	4	477	637	794	3.43e-87	288	92.41
41656	XP_019041147.1	81.29	155	29	0	1	465	576	730	2.92e-85	282	92.26
41656	XP_022456348.1	71.25	160	44	1	4	477	650	809	2.81e-75	254	85
41656	XP_013932689.1	70.625	160	46	1	1	477	607	766	2.37e-74	251	83.12
41656	XP_020074639.1	72.152	158	42	1	1	468	235	392	1.02e-72	245	82.28
41656	XP_018711367.1	71.795	156	43	1	4	468	649	804	1.54e-72	246	82.69
41656	XP_460862.2	72.152	158	42	1	1	468	655	812	1.56e-72	246	81.65
41656	XP_015469882.1	72.152	158	42	1	1	468	655	812	1.65e-72	246	81.65
41656	XP_001386860.2	70.253	158	45	1	1	468	645	802	5.08e-72	244	82.91
41656	XP_001487483.1	71.338	157	44	1	1	468	623	779	7.11e-71	241	81.53
41656	XP_018166283.2	70.513	156	45	1	4	468	630	785	9.17e-71	241	82.69
41656	XP_002553105.1	69.62	158	48	0	4	477	647	804	1.98e-70	240	81.65
41656	XP_003677501.1	65.625	160	54	1	1	477	646	805	8.95e-69	235	80.62
41656	XP_022466228.1	66.038	159	53	1	4	477	652	810	1.12e-68	235	83.02
41656	XP_002614726.1	68.79	157	48	1	1	468	620	776	3.96e-68	234	82.17
41656	XP_003670828.1	66.46	161	51	2	1	477	488	647	7.4e-68	233	80.75
41656	NP_014297.3	65	160	55	1	1	477	662	821	1.55e-67	232	82.5
41656	XP_018219774.1	65	160	55	1	1	477	662	821	1.95e-67	231	82.5
41656	XP_446650.1	66.25	160	53	1	1	477	648	807	6.81e-67	230	78.12
41656	XP_020064638.1	67.081	161	51	1	1	477	628	788	2.9e-66	228	76.4
41656	XP_018988538.1	66.875	160	52	1	1	477	611	770	4.29e-66	228	76.88
41656	XP_003686089.1	65.625	160	54	1	1	477	648	807	5.11e-66	228	80
41656	XP_022678286.1	63.75	160	57	1	1	477	626	785	5.34e-66	228	81.25
41656	XP_003868577.1	67.949	156	48	1	1	462	632	787	6.44e-66	227	78.85
41656	NP_985237.1	64.375	160	56	1	1	477	631	790	9.65e-66	227	82.5
41656	XP_452791.1	65	160	55	1	1	477	622	781	1.08e-65	226	80.62
41656	XP_002495366.1	63.125	160	58	1	1	477	640	799	1.19e-65	226	80
41656	XP_003682153.1	64.375	160	56	1	1	477	634	793	1.63e-65	226	79.38
41656	XP_022630112.1	65.359	153	53	0	4	462	665	817	2.06e-65	226	82.35
41656	XP_003956981.1	62.5	160	59	1	1	477	640	799	5.97e-65	224	78.75
41656	XP_003646980.1	65	160	55	1	1	477	661	820	1.38e-64	223	80
41656	XP_001526084.1	66.879	157	48	1	4	462	706	862	1.52e-64	223	77.07
41656	XP_020047726.1	67.308	156	49	1	4	465	752	907	1.57e-64	223	77.56
41656	XP_017986688.1	63.75	160	56	1	4	477	644	803	2.53e-64	223	78.75
41656	XP_004178499.1	61.875	160	60	1	1	477	679	838	2.88e-64	223	81.25
41656	XP_007376412.1	65	160	54	1	4	477	627	786	1.23e-63	221	76.25
41656	XP_002548020.1	65	160	54	1	4	477	653	812	5.01e-62	216	75.62
41656	XP_020546562.1	63.871	155	53	2	4	462	706	859	5.22e-62	216	80
41656	XP_002419339.1	67.516	157	49	1	4	468	710	866	2.25e-61	214	76.43
41656	XP_723089.2	66.879	157	50	1	4	468	652	808	6.03e-61	213	76.43
41656	XP_002491836.1	65.584	154	52	1	1	462	631	783	1.18e-60	212	75.32
41656	XP_019016845.1	60.377	159	62	1	4	477	687	845	7.78e-60	210	75.47
41656	XP_006689806.1	63.057	157	56	1	4	468	622	778	9.73e-57	201	75.8
41656	XP_016218395.1	46.711	152	80	1	4	459	657	807	2.23e-36	143	61.84
41656	XP_020134866.1	48.052	154	77	2	4	459	661	813	5.99e-36	141	61.04
41656	XP_007703369.1	46.203	158	84	1	4	477	668	824	1.13e-35	140	60.76
41656	XP_014078934.1	46.203	158	84	1	4	477	668	824	1.2e-35	140	60.76
41656	XP_003843485.1	44.937	158	86	1	4	477	661	817	3.16e-35	139	61.39
41656	XP_001939019.1	44.304	158	87	1	4	477	666	822	3.73e-35	139	61.39
41656	XP_016268236.1	44.375	160	86	2	4	477	652	810	3.99e-35	139	60.62
41656	XP_008029824.1	44.937	158	86	1	4	477	641	797	5.28e-35	139	60.76
41656	XP_002835925.1	45.395	152	82	1	4	459	669	819	6.66e-35	139	61.84
41656	XP_001798698.1	43.671	158	88	1	4	477	660	816	1.04e-34	138	61.39
41656	XP_009850552.1	45.679	162	82	3	4	477	669	828	1.16e-34	138	59.88
41656	XP_963131.2	45.679	162	82	3	4	477	669	828	1.21e-34	138	59.88
41656	XP_018389061.1	44.304	158	87	1	4	477	667	823	1.64e-34	137	60.13
41656	XP_003350431.1	45.679	162	82	3	4	477	669	828	1.66e-34	137	59.26
41656	XP_009224306.1	42.857	161	88	2	4	477	701	860	3.7e-34	136	59.63
41656	XP_011122180.1	42.105	152	85	1	4	459	657	805	4.82e-34	136	63.82
41656	XP_018736742.1	42.675	157	84	1	7	477	259	409	6.75e-34	135	62.42
41656	XP_013339898.1	45.513	156	77	3	4	459	664	815	9.53e-34	135	60.9
41656	XP_013331112.1	44.375	160	85	2	4	477	632	789	9.6e-34	135	57.5
41656	XP_018038578.1	44.079	152	84	1	4	459	654	804	1.61e-33	134	60.53
41656	XP_006697424.1	45.342	161	84	2	4	477	671	830	2.28e-33	134	58.39
41656	XP_007838538.1	47.771	157	76	3	4	465	663	816	2.53e-33	134	60.51
41656	XP_013316627.1	42.5	160	89	2	4	477	652	810	3.07e-33	134	60
41656	XP_016240469.1	43.125	160	87	2	4	477	653	810	3.16e-33	134	59.38
41656	XP_003655920.1	45	160	85	2	4	477	668	826	6.66e-33	133	58.13
41656	XP_013262299.1	43.125	160	88	2	4	477	650	808	6.98e-33	133	58.13
41656	XP_007680136.1	45.752	153	81	2	4	459	661	812	8.4e-33	132	58.82
41656	XP_003717174.1	43.114	167	83	3	4	477	673	836	9.44e-33	132	55.09
41656	XP_007723418.1	42.5	160	89	2	4	477	655	813	1.34e-32	132	58.13
41656	XP_017996511.1	46.753	154	79	3	4	459	660	812	1.4e-32	132	60.39
41656	XP_007729731.1	42.5	160	89	2	4	477	654	812	1.46e-32	132	58.75
41656	XP_001908464.1	46.429	168	71	6	4	477	668	826	1.52e-32	132	58.33
41656	XP_002565998.1	45.806	155	78	4	4	459	663	814	1.65e-32	132	60.65
41656	XP_008729389.1	44.375	160	85	3	4	477	651	808	1.67e-32	132	60
41656	XP_018188273.1	44.231	156	84	2	4	465	665	819	1.84e-32	131	59.62
41656	XP_022489250.1	45.161	155	79	4	4	459	663	814	1.97e-32	131	61.29
41656	XP_019025042.1	44.737	152	83	1	4	459	662	812	2.08e-32	131	60.53
41656	XP_016221280.1	42.5	160	89	2	4	477	655	813	2.32e-32	131	58.13
41656	XP_007910856.1	41.875	160	90	2	4	477	664	822	2.93e-32	131	58.75
41656	XP_002481007.1	45.455	154	80	3	4	459	667	818	3.72e-32	130	58.44
41656	XP_007757872.1	43.75	160	86	3	4	477	651	808	4.1e-32	130	60
41656	XP_007919946.1	43.791	153	84	2	4	459	660	811	4.18e-32	130	59.48
41656	XP_002172801.2	43.038	158	87	2	4	477	651	805	4.29e-32	130	61.39
41656	XP_014533617.1	45.161	155	79	4	4	459	662	813	4.88e-32	130	60.65
41656	XP_003854330.1	45.455	154	78	3	4	459	658	807	4.89e-32	130	60.39
41656	XP_008714460.1	44.156	154	83	2	4	459	657	809	7.69e-32	130	59.09
41656	XP_016602887.1	43.871	155	81	3	4	459	663	814	8.07e-32	130	59.35
41656	XP_013269985.1	41.875	160	90	2	4	477	651	809	8.47e-32	129	58.75
41656	XP_009160480.1	41.875	160	90	2	4	477	655	813	9.33e-32	129	58.13
41656	XP_020117384.1	44.805	154	81	3	4	459	664	815	9.61e-32	129	58.44
41656	XP_016585004.1	42.945	163	85	3	4	477	705	864	9.94e-32	129	57.06
41656	XP_003662638.1	43.75	160	87	2	4	477	671	829	1.16e-31	129	56.88
41656	XP_022399120.1	43.506	154	83	2	4	459	666	817	1.2e-31	129	59.09
41656	XP_002151991.1	42.857	154	84	2	4	459	667	818	1.25e-31	129	57.14
41656	XP_023622987.1	44.805	154	79	3	4	459	585	734	1.3e-31	129	59.74
41656	XP_011323957.1	43.75	160	87	2	4	477	658	816	1.4e-31	129	57.5
41658	WP_106468940.1	100	129	0	0	506	120	326	454	1.36e-75	241	100
41658	WP_097049702.1	100	129	0	0	506	120	326	454	1.39e-75	241	100
41658	WP_088026911.1	100	129	0	0	506	120	326	454	1.39e-75	241	100
41658	WP_100440294.1	100	129	0	0	506	120	326	454	1.62e-75	241	100
41658	WP_087923436.1	99.225	129	1	0	506	120	326	454	2.21e-75	241	100
41658	WP_100473712.1	99.225	129	1	0	506	120	326	454	2.99e-75	241	100
41658	WP_105164553.1	98.45	129	2	0	506	120	326	454	7.42e-75	239	100
41658	WP_032975160.1	98.45	129	2	0	506	120	326	454	8e-75	239	100
41658	WP_014038253.1	99.225	129	1	0	506	120	326	454	1.05e-74	239	99.22
41658	WP_049398200.1	99.225	129	1	0	506	120	326	454	1.08e-74	239	99.22
41658	WP_006386904.1	99.225	129	1	0	506	120	326	454	1.15e-74	239	99.22
41658	WP_075676426.1	99.225	129	1	0	506	120	326	454	1.25e-74	239	99.22
41658	WP_019660160.1	99.225	129	1	0	506	120	326	454	1.27e-74	239	99.22
41658	WP_021202062.1	99.225	129	1	0	506	120	326	454	1.34e-74	239	99.22
41658	WP_005418588.1	99.225	129	1	0	506	120	326	454	1.34e-74	239	99.22
41658	WP_061480565.1	99.225	129	1	0	506	120	326	454	1.39e-74	239	99.22
41658	WP_032128815.1	99.225	129	1	0	506	120	326	454	1.39e-74	239	99.22
41658	WP_065178921.1	99.225	129	1	0	506	120	326	454	1.42e-74	239	99.22
41658	WP_049422963.1	99.225	129	1	0	506	120	326	454	1.46e-74	239	99.22
41658	WP_099560245.1	99.225	129	1	0	506	120	326	454	1.51e-74	239	99.22
41658	WP_049413347.1	99.225	129	1	0	506	120	326	454	1.74e-74	238	99.22
41658	WP_057498783.1	99.225	129	1	0	506	120	326	454	1.78e-74	238	99.22
41658	WP_019338718.1	99.225	129	1	0	506	120	326	454	1.92e-74	238	99.22
41658	WP_053499175.1	99.225	129	1	0	506	120	326	454	2.05e-74	238	99.22
41658	WP_049406708.1	98.45	129	2	0	506	120	326	454	3.36e-74	238	99.22
41658	WP_014648191.1	98.45	129	2	0	506	120	326	454	3.44e-74	238	99.22
41658	WP_093818745.1	97.674	129	3	0	506	120	326	454	3.47e-74	238	100
41658	WP_099785186.1	97.674	129	3	0	506	120	326	454	4.18e-74	238	99.22
41658	WP_049467583.1	98.45	129	2	0	506	120	326	454	4.31e-74	238	99.22
41658	WP_088476221.1	98.45	129	2	0	506	120	326	454	4.41e-74	238	99.22
41658	WP_012481089.1	98.45	129	2	0	506	120	326	454	5.41e-74	237	99.22
41658	WP_010481544.1	98.45	129	2	0	506	120	326	454	5.41e-74	237	99.22
41658	WP_099597871.1	98.45	129	2	0	506	120	326	454	5.53e-74	237	99.22
41658	WP_088430651.1	98.45	129	2	0	506	120	326	454	5.53e-74	237	99.22
41658	WP_005410785.1	98.45	129	2	0	506	120	326	454	5.83e-74	237	99.22
41658	WP_074725048.1	98.45	129	2	0	506	120	326	454	6.36e-74	237	99.22
41658	WP_057494710.1	98.45	129	2	0	506	120	326	454	6.5e-74	237	99.22
41658	WP_043402878.1	98.45	129	2	0	506	120	326	454	6.94e-74	237	99.22
41658	WP_025874305.1	97.674	129	3	0	506	120	326	454	7.16e-74	237	100
41658	WP_080150554.1	97.674	129	3	0	506	120	326	454	7.64e-74	237	100
41658	WP_088101002.1	97.674	129	3	0	506	120	326	454	7.81e-74	237	100
41658	WP_099596225.1	98.45	129	2	0	506	120	326	454	9.69e-74	236	99.22
41658	WP_058981924.1	98.45	129	2	0	506	120	326	454	1.07e-73	236	98.45
41658	WP_049447464.1	97.674	129	3	0	506	120	326	454	1.35e-73	236	99.22
41658	WP_099553716.1	98.45	129	2	0	506	120	326	454	1.45e-73	236	98.45
41658	WP_049429153.1	97.674	129	3	0	506	120	326	454	1.58e-73	236	98.45
41658	WP_074899627.1	97.674	129	3	0	506	120	326	454	1.66e-73	236	99.22
41658	WP_053517011.1	97.674	129	3	0	506	120	326	454	1.75e-73	236	99.22
41658	WP_065199827.1	97.674	129	3	0	506	120	326	454	1.89e-73	236	99.22
41658	WP_100460157.1	97.674	129	3	0	506	120	326	454	2.11e-73	236	99.22
41658	WP_089236590.1	97.674	129	3	0	506	120	326	454	2.2e-73	236	99.22
41658	WP_004154451.1	98.438	128	2	0	506	123	326	453	2.95e-73	235	99.22
41658	WP_049456073.1	98.438	128	2	0	506	123	326	453	3.28e-73	235	99.22
41658	WP_040007228.1	98.438	128	2	0	506	123	326	453	3.32e-73	235	99.22
41658	WP_075075711.1	97.674	129	3	0	506	120	326	454	3.94e-73	235	98.45
41658	WP_099820881.1	96.899	129	4	0	506	120	326	454	6.48e-73	234	99.22
41658	WP_043035124.1	97.674	129	3	0	506	120	326	454	1.06e-72	234	98.45
41658	WP_049469875.1	96.124	129	5	0	506	120	326	454	2.37e-72	233	99.22
41658	WP_079222928.1	96.124	129	5	0	506	120	326	454	3.49e-72	233	99.22
41658	WP_038686655.1	91.473	129	11	0	506	120	326	454	1.86e-67	221	95.35
41658	WP_046273843.1	91.473	129	11	0	506	120	326	454	3.96e-67	219	95.35
41658	WP_088433878.1	91.473	129	11	0	506	120	326	454	4.55e-67	219	95.35
41658	WP_019183949.1	91.473	129	11	0	506	120	326	454	4.55e-67	219	95.35
41658	WP_070471234.1	91.473	129	11	0	506	120	326	454	8.96e-67	219	95.35
41658	WP_102945232.1	92.126	127	10	0	503	123	327	453	1.2e-65	216	94.49
41658	WP_070208748.1	92.126	127	10	0	503	123	327	453	1.22e-65	216	94.49
41658	WP_042613440.1	89.062	128	14	0	506	123	326	453	7.22e-65	214	96.09
41658	WP_101098809.1	89.062	128	14	0	506	123	326	453	7.95e-65	214	96.09
41658	WP_095363647.1	90.551	127	12	0	503	123	327	453	8.06e-65	214	96.06
41658	WP_093533725.1	90.551	127	12	0	503	123	327	453	8.33e-65	214	96.06
41658	WP_057506895.1	88.281	128	15	0	506	123	326	453	1.69e-64	213	96.09
41658	WP_068853787.1	89.764	127	13	0	503	123	327	453	4.04e-64	212	95.28
41658	WP_043908981.1	84.252	127	20	0	506	126	130	256	1.4e-62	202	92.91
41658	WP_028917203.1	87.5	128	16	0	506	123	326	453	2.78e-62	207	93.75
41658	WP_024867796.1	86.719	128	17	0	506	123	326	453	6.03e-62	206	93.75
41658	WP_057645192.1	86.719	128	17	0	506	123	326	453	8.68e-62	206	94.53
41658	WP_014508687.1	85.827	127	18	0	506	126	326	452	4.25e-61	204	93.7
41658	WP_011038197.1	85.827	127	18	0	506	126	326	452	4.58e-61	204	93.7
41658	WP_017913443.1	83.594	128	21	0	506	123	184	311	4.63e-61	200	91.41
41658	WP_017909437.1	83.594	128	21	0	506	123	184	311	7.46e-61	199	91.41
41658	WP_066094343.1	85.156	128	19	0	506	123	327	454	1.01e-60	203	90.62
41658	WP_056931856.1	86.047	129	18	0	506	120	326	454	1.51e-60	202	89.15
41658	WP_054663817.1	86.047	129	18	0	506	120	326	454	1.59e-60	202	89.15
41658	WP_101361856.1	82.812	128	22	0	506	123	326	453	3.91e-60	202	92.97
41658	WP_019303879.1	82.812	128	22	0	506	123	326	453	4.74e-60	201	92.19
41658	WP_014504300.1	82.812	128	22	0	506	123	326	453	4.79e-60	201	92.19
41658	WP_046941059.1	84.252	127	20	0	506	126	280	406	4.81e-60	200	92.91
41658	WP_024743731.1	82.812	128	22	0	506	123	326	453	4.85e-60	201	92.19
41658	WP_019300796.1	82.812	128	22	0	506	123	326	453	5e-60	201	92.19
41658	WP_011258376.1	82.812	128	22	0	506	123	326	453	6.54e-60	201	92.19
41658	WP_104604260.1	84.252	127	20	0	506	126	326	452	7.05e-60	201	92.91
41658	WP_104650213.1	84.252	127	20	0	506	126	326	452	7.13e-60	201	92.91
41658	WP_104583636.1	84.252	127	20	0	506	126	326	452	7.13e-60	201	92.91
41658	WP_012444454.1	82.812	128	22	0	506	123	326	453	7.2e-60	201	92.19
41658	WP_064634560.1	84.252	127	20	0	506	126	326	452	8.02e-60	201	92.91
41658	WP_017121262.1	82.812	128	22	0	506	123	326	453	8.64e-60	201	91.41
41658	WP_055824185.1	84.252	127	20	0	506	126	326	452	9.12e-60	201	92.91
41658	WP_104592268.1	84.252	127	20	0	506	126	326	452	9.42e-60	201	92.91
41658	WP_023904889.1	84.252	127	20	0	506	126	326	452	9.42e-60	201	92.91
41658	WP_010363332.1	82.812	128	22	0	506	123	326	453	1.02e-59	201	91.41
41662	XP_017469498.1	60.588	170	67	0	511	2	505	674	2.67e-66	227	75.88
41662	XP_011688730.1	48.837	172	85	2	511	2	868	1038	5.35e-43	162	65.7
41662	XP_023304133.1	47.059	170	85	3	511	8	822	988	5.72e-39	150	65.88
41662	XP_011699196.1	44.186	172	92	2	511	2	999	1168	1.75e-36	143	61.63
41662	XP_011858346.1	43.75	176	93	3	511	2	990	1165	9.12e-36	141	64.77
41662	XP_018357329.1	42.012	169	95	2	511	11	836	1003	4.05e-34	136	62.13
41662	XP_012264687.1	41.243	177	97	3	511	2	889	1065	1.44e-32	132	61.58
41662	XP_014612526.1	40.341	176	99	2	511	2	667	842	2.89e-32	131	58.52
41662	XP_012225735.1	40.606	165	97	1	511	20	759	923	1.64e-30	126	58.79
41662	XP_012250717.1	46.154	143	71	3	511	101	767	909	7.97e-30	124	64.34
41662	XP_023220295.1	39.881	168	95	3	511	20	178	343	9.35e-30	124	62.5
41662	XP_012232667.1	40.341	176	99	3	511	2	785	960	1.26e-29	123	57.95
41662	XP_011859156.1	38.953	172	103	2	511	2	780	951	2.73e-27	117	55.81
41662	XP_015437900.1	39.103	156	92	2	511	47	940	1093	5.78e-27	116	58.33
41662	XP_011859227.1	36.628	172	107	2	511	2	1145	1316	6.2e-27	115	58.72
41662	XP_021206776.1	47.899	119	59	2	511	164	236	354	1.31e-26	112	63.87
41662	XP_015187531.1	41.781	146	79	3	511	92	777	922	1.93e-26	114	63.7
41662	XP_011059060.1	38.286	175	79	4	511	11	421	574	3.01e-26	113	56
41662	XP_018377468.1	37.209	172	106	2	511	2	890	1061	4.41e-26	113	55.23
41662	XP_014614736.1	38.728	173	100	2	511	11	681	853	1.05e-25	112	55.49
41662	XP_016662070.1	48.148	108	55	1	511	191	911	1018	1.12e-25	112	69.44
41662	XP_022160829.1	48.148	108	55	1	511	191	835	942	1.18e-25	112	69.44
41662	XP_011861043.1	38.889	180	97	5	511	11	697	876	4.26e-25	110	56.11
41662	XP_012522628.1	43.704	135	71	3	511	122	280	414	5.85e-25	110	64.44
41662	XP_011699344.1	36.158	177	95	3	511	35	23	199	6.47e-25	108	55.37
41662	XP_011172251.1	36.905	168	103	2	511	11	655	820	7.21e-25	110	55.95
41662	XP_015834403.1	36.364	187	96	4	511	11	811	994	4.9e-24	107	51.87
41662	XP_015834404.1	36.364	187	96	4	511	11	740	923	4.98e-24	107	51.87
41662	XP_015834401.1	36.364	187	96	4	511	11	927	1110	6.35e-24	107	51.87
41662	XP_011549944.1	48.649	111	54	1	511	188	429	539	7.67e-24	107	64.86
41662	XP_015435727.1	42.52	127	70	1	511	140	794	920	8.12e-24	107	61.42
41662	XP_022180110.1	34.161	161	105	1	511	32	900	1060	8.9e-24	107	58.39
41662	XP_022828868.1	49.541	109	54	1	511	188	944	1052	1.38e-23	106	65.14
41662	XP_012146603.1	43.243	148	76	4	511	92	194	341	2.2e-23	105	58.78
41662	XP_012146603.1	43.119	109	45	3	511	188	31	123	1.67e-12	74.3	54.13
41662	XP_022830950.1	38	150	82	2	511	95	986	1135	3.39e-23	105	56.67
41662	XP_018334306.1	46.296	108	58	0	511	188	392	499	5.4e-23	104	61.11
41662	XP_018368249.1	35.088	171	109	2	511	2	514	683	9.49e-23	103	54.39
41662	XP_017473664.1	32.948	173	110	2	511	11	211	383	2.01e-22	103	56.07
41662	XP_001810078.1	45.192	104	57	0	499	188	825	928	2.03e-22	103	65.38
41662	XP_012543347.1	33.721	172	112	2	511	2	863	1034	6.06e-22	101	57.56
41662	XP_011161629.1	37.209	172	97	4	511	2	436	598	6.8e-22	101	55.23
41662	XP_011054535.1	41.549	142	75	5	505	86	156	291	9.42e-22	100	60.56
41662	XP_017474117.1	35.838	173	92	4	466	5	224	396	3.83e-21	99.4	52.6
41662	XP_011701332.1	35.26	173	105	4	511	2	901	1069	9.48e-21	98.2	54.91
41662	XP_011336732.1	39.474	152	86	3	511	68	780	929	8.94e-20	95.5	55.26
41662	XP_011859685.1	41.509	106	61	1	511	197	693	798	1.06e-19	95.1	66.98
41662	XP_018316620.1	33.333	171	111	2	511	2	969	1137	1.5e-19	94.7	51.46
41662	XP_023307370.1	34.706	170	100	2	511	35	817	986	1.6e-19	94.7	52.94
41662	XP_012217679.1	38.053	113	69	1	343	5	223	334	1.15e-18	92	63.72
41662	XP_017486578.1	36	150	86	3	511	92	964	1113	1.28e-18	92	56
41662	XP_024226581.1	33.908	174	96	3	511	38	664	834	1.6e-18	92	51.72
41662	XP_011869954.1	35.26	173	99	5	511	11	939	1104	4.37e-18	90.5	52.02
41662	XP_011686421.1	41.121	107	62	1	511	194	235	341	8.49e-18	88.6	61.68
41662	XP_014256467.1	42.727	110	61	1	511	182	44	151	1.33e-17	87	57.27
41662	XP_012215610.1	32.934	167	105	3	511	20	833	995	1.92e-17	89	55.09
41662	XP_017481076.1	41.053	95	54	1	316	32	2	94	5.04e-17	84	67.37
41662	XP_008548388.2	47.17	106	54	1	508	197	880	985	1.14e-15	83.6	62.26
41662	XP_017476102.1	40.187	107	63	1	511	194	56	162	2.4e-15	82	60.75
41662	XP_011170451.1	32.051	156	101	3	511	47	346	497	3.56e-15	82.4	54.49
41662	XP_015795575.1	28.495	186	107	4	511	32	981	1166	1.28e-14	80.9	48.92
41662	XP_022528993.1	33.553	152	83	1	511	110	1080	1231	2.87e-14	79.7	45.39
41662	XP_023315384.1	29.787	188	113	6	511	2	1090	1276	3.2e-14	79.7	51.6
41662	XP_018496364.1	32.258	155	96	2	511	47	810	955	8.05e-13	75.5	51.61
41662	XP_002410408.1	35.78	109	70	0	508	182	380	488	8.69e-13	75.1	55.96
41662	XP_018939388.1	41.509	106	62	0	511	194	591	696	1.35e-12	74.7	51.89
41662	XP_018967376.1	39.623	106	64	0	511	194	1230	1335	1.44e-12	74.7	51.89
41662	XP_017326732.1	41.237	97	57	0	511	221	983	1079	1.77e-12	74.3	56.7
41662	XP_017949549.1	39.623	106	64	0	511	194	1308	1413	5.03e-12	73.2	53.77
41662	XP_017888656.1	52.703	74	33	1	511	296	843	916	7.41e-12	72.8	66.22
41662	XP_017484587.1	56.338	71	29	1	511	305	830	900	8.3e-12	72.4	67.61
41662	XP_018955315.1	34.731	167	92	3	511	14	16	166	1.13e-11	72	47.31
41662	XP_011161412.1	30.818	159	86	5	511	38	621	756	1.22e-11	72	50.31
41662	XP_011157626.1	30.097	103	71	1	337	29	583	684	1.51e-11	71.6	62.14
41662	XP_021325913.1	40.566	106	63	0	511	194	1219	1324	1.56e-11	71.6	50.94
41662	XP_003738020.1	31.765	170	85	5	439	11	948	1113	2.05e-11	71.6	45.88
41662	XP_018426179.1	39.13	115	69	1	511	167	666	779	2.06e-11	71.2	50.43
41662	XP_023247769.1	36.264	91	58	0	460	188	968	1058	2.19e-11	71.2	58.24
41662	XP_012151023.1	46.479	71	38	0	424	212	51	121	2.85e-11	70.9	67.61
41662	XP_011165440.1	33.835	133	79	3	427	32	90	214	3.43e-11	69.3	48.87
41662	XP_018122323.1	40.566	106	63	0	511	194	817	922	5.69e-11	70.1	50
41662	XP_008391257.1	32.075	159	97	6	511	50	950	1102	6.73e-11	70.1	54.09
41662	XP_011684299.1	54.93	71	30	1	511	305	289	359	8.19e-11	69.3	63.38
41662	XP_023970305.1	40.566	106	63	0	511	194	1305	1410	8.86e-11	69.7	50
41662	XP_008387198.1	32.298	161	98	6	511	44	795	949	1.09e-10	69.3	52.8
41662	XP_022197181.1	33.588	131	83	2	511	122	417	544	1.35e-10	68.9	49.62
41662	XP_008446938.1	32.5	160	98	5	478	17	956	1111	1.67e-10	68.9	51.88
41662	XP_017326725.1	40	95	57	0	511	227	926	1020	2.08e-10	68.6	53.68
41662	XP_023303892.1	35.294	102	66	0	478	173	963	1064	2.1e-10	68.6	50.98
41662	XP_023159122.1	37.963	108	66	1	511	191	926	1033	2.64e-10	68.2	54.63
41662	XP_011858461.1	30.872	149	92	2	415	2	883	1031	3.73e-10	67.8	47.65
41662	XP_008043835.1	35.78	109	67	2	511	194	25	133	5.28e-10	65.1	52.29
41662	XP_022538550.1	33.871	124	80	1	511	140	1018	1139	6.19e-10	67.4	53.23
41662	XP_022538550.1	33.871	124	80	1	511	140	287	408	8.74e-10	66.6	53.23
41662	XP_005713004.1	37.037	108	66	2	511	194	40	147	7.34e-10	66.6	52.78
41662	XP_019204289.1	40.566	106	63	0	511	194	1361	1466	8.02e-10	67	48.11
41662	XP_013163660.1	34.579	107	69	1	511	194	169	275	8.3e-10	66.6	55.14
41662	XP_019204294.1	40.566	106	63	0	511	194	1251	1356	8.95e-10	66.6	48.11
41662	XP_008460615.1	31.875	160	99	5	478	17	835	990	1.16e-09	66.6	50
41662	XP_022842142.1	34.545	110	68	1	475	146	620	725	1.52e-09	65.9	50
41662	XP_014436125.1	35.455	110	71	0	511	182	922	1031	2.02e-09	65.9	48.18
41662	XP_019848278.1	38.554	83	48	2	250	2	148	227	2.45e-09	65.1	68.67
41664	NP_013378.1	100	46	0	0	139	2	1	46	5.55e-21	99	100
41664	XP_018220682.1	84.783	46	7	0	139	2	1	46	7.64e-16	84.3	91.3
41664	XP_003672008.1	73.171	41	11	0	127	5	3	43	5.57e-09	64.3	82.93
41664	XP_022673741.1	71.795	39	11	0	121	5	5	43	6.4e-09	64.3	89.74
41664	XP_004178276.1	63.043	46	17	0	139	2	1	46	1.83e-08	62.8	76.09
41664	XP_003676236.1	70	40	12	0	121	2	9	48	3.25e-08	62	80
41664	XP_003955067.1	72.222	36	10	0	109	2	12	47	2.16e-07	59.7	83.33
41664	XP_452403.1	66.667	39	13	0	121	5	5	43	2.23e-07	59.7	87.18
41664	XP_446188.1	75	36	9	0	109	2	8	43	2.45e-07	59.7	83.33
41664	XP_002616676.1	62.5	40	15	0	124	5	3	42	6.02e-07	58.5	85
41664	XP_002497055.1	72.222	36	10	0	109	2	12	47	6.65e-07	58.2	83.33
41664	XP_019016956.1	54.348	46	21	0	139	2	1	46	8.14e-07	58.2	76.09
41664	XP_022465210.1	66.667	36	12	0	109	2	12	47	1.02e-06	57.8	83.33
41664	XP_022630419.1	65.116	43	14	1	130	2	3	44	1.35e-06	57.4	81.4
41664	XP_011272211.1	60	40	16	0	121	2	5	44	3.3e-06	56.2	77.5
41664	XP_020546802.1	60	40	16	0	121	2	5	44	4.08e-06	56.2	77.5
41664	XP_460896.1	70.588	34	10	0	106	5	16	49	5.27e-06	55.8	88.24
41664	XP_020077048.1	60	40	16	0	124	5	5	44	5.75e-06	55.5	77.5
41664	XP_003682977.1	69.444	36	11	0	109	2	12	47	5.75e-06	55.5	80.56
41664	XP_022459088.1	70.588	34	10	0	106	5	17	50	8.81e-06	55.1	88.24
41664	XP_001384736.1	53.846	39	18	0	121	5	5	43	1.28e-05	54.7	87.18
41664	XP_015465195.1	70.588	34	10	0	106	5	16	49	1.77e-05	54.3	85.29
41664	XP_006688412.1	57.5	40	17	0	121	2	9	48	1.77e-05	54.3	85
41664	XP_019040419.1	58.974	39	16	0	121	5	5	43	1.96e-05	53.9	82.05
41664	XP_002555695.1	69.444	36	11	0	112	5	8	43	2.62e-05	53.5	77.78
41664	XP_002548589.1	52	50	22	1	154	5	31	78	3.99e-05	53.1	70
41664	XP_017989873.1	57.5	40	17	0	121	2	6	45	4.33e-05	53.1	77.5
41664	XP_002493906.1	57.143	35	15	0	109	5	10	44	4.6e-05	53.1	88.57
41664	XP_003687680.1	55.556	45	20	0	139	5	1	45	4.83e-05	52.8	68.89
41664	XP_002420966.1	58.974	39	16	0	121	5	4	42	5.1e-05	52.8	76.92
41664	XP_716703.2	58.974	39	16	0	121	5	4	42	5.41e-05	52.8	76.92
41664	XP_020046582.1	56.41	39	17	0	121	5	8	46	7.04e-05	52.4	76.92
41664	XP_013936233.1	52.5	40	19	0	121	2	4	43	7.96e-05	52.4	77.5
41664	XP_018714138.1	53.659	41	19	0	127	5	2	42	8.42e-05	52.4	82.93
41664	XP_018210209.1	52.5	40	19	0	121	2	4	43	9.44e-05	52	77.5
41664	XP_020066994.1	61.111	36	14	0	109	2	10	45	0.000148	51.6	83.33
41664	XP_018987777.1	57.5	40	17	0	121	2	9	48	0.000504	50.1	72.5
41664	XP_001523948.1	50	44	22	0	136	5	5	48	0.000874	49.3	70.45
41668	XP_019039789.1	67.708	96	19	3	31	285	388	482	6e-30	124	75
41668	XP_020069018.1	63.636	99	33	1	28	324	406	501	6.77e-29	121	68.69
41668	XP_011277302.1	57.391	115	22	3	28	294	431	544	3.59e-28	119	65.22
41668	XP_020066454.1	48.454	97	38	3	34	288	381	477	2e-17	89	62.89
41668	XP_006684079.1	48.515	101	34	3	31	282	392	491	2.24e-17	88.6	61.39
41668	XP_457629.2	43.697	119	47	3	31	330	398	515	2.44e-17	88.6	57.98
41668	XP_006684078.1	48.515	101	34	3	31	282	258	357	2.65e-17	88.2	61.39
41668	XP_001484587.1	53.571	84	32	4	34	282	343	420	3.12e-17	88.2	77.38
41668	XP_020078284.1	46.939	98	37	3	31	282	439	535	6.54e-17	87.4	63.27
41668	XP_015467576.1	43.75	112	44	2	31	309	397	508	7.85e-17	87	58.93
41668	XP_002617271.1	49.462	93	33	3	31	276	378	467	4.76e-16	84.7	63.44
41668	XP_018169236.2	45.833	96	43	3	31	294	468	562	6.28e-16	84.3	63.54
41668	XP_018733423.1	47.525	101	43	4	31	309	421	519	8.09e-16	84.3	61.39
41668	XP_018710505.1	46.939	98	39	2	34	288	402	499	1.15e-15	83.6	59.18
41668	XP_007372662.1	50.549	91	35	3	31	276	407	496	5.14e-15	82	65.93
41668	XP_713814.1	43.519	108	49	4	31	324	418	523	7.05e-15	81.6	61.11
41668	XP_002489509.1	48.485	99	35	4	31	282	326	423	1.27e-14	80.5	60.61
41668	XP_003866661.1	44.444	108	36	2	31	282	508	615	1.39e-14	80.5	54.63
41668	XP_002417694.1	45.652	92	40	3	31	276	416	507	4.97e-14	79	64.13
41668	XP_001528276.1	44.792	96	25	3	79	282	646	741	3.13e-13	76.6	55.21
41668	XP_002549824.1	40.741	108	37	2	31	273	474	581	6.3e-13	75.9	50
41668	XP_001387398.2	40.952	105	38	2	31	273	399	503	3.92e-12	73.6	54.29
41668	XP_500831.1	73.529	34	9	0	190	291	507	540	1.02e-08	63.5	85.29
41668	XP_020047411.1	88.889	27	3	0	193	273	739	765	3.44e-08	62.4	100
41668	XP_022458469.1	79.31	29	6	0	187	273	294	322	1.45e-07	60.1	93.1
41668	XP_018211137.1	76.667	30	7	0	190	279	350	379	3.06e-07	59.3	86.67
41668	XP_019016729.1	48.333	60	30	1	106	285	309	367	3.35e-07	59.3	60
41668	XP_013934726.1	76.667	30	7	0	190	279	296	325	4.27e-07	58.9	86.67
41668	XP_018982874.1	77.419	31	7	0	181	273	470	500	4.46e-07	58.9	87.1
41668	XP_011118696.1	74.194	31	8	0	181	273	1530	1560	4.73e-07	58.9	83.87
41670	XP_006685600.1	79.012	162	34	0	532	47	407	568	1.53e-91	286	91.36
41670	XP_006685002.1	76.875	160	37	0	529	50	408	567	4.67e-86	272	87.5
41670	XP_007828926.1	65.839	161	55	0	529	47	445	605	6.1e-76	247	83.23
41670	XP_022405093.1	64.151	159	57	0	529	53	424	582	2.45e-71	234	78.62
41670	XP_022491526.1	64.103	156	54	1	529	68	425	580	7.01e-67	223	77.56
41670	XP_016594068.1	62.112	161	60	1	532	50	424	583	1.44e-66	222	75.16
41670	XP_022578978.1	62.338	154	55	1	529	68	368	518	6.01e-66	219	79.22
41670	XP_020053747.1	60.625	160	62	1	532	53	410	568	9.59e-66	219	76.88
41670	XP_014175634.1	59.006	161	66	0	529	47	409	569	1.76e-65	219	77.64
41670	XP_002372173.1	61.783	157	58	1	532	68	425	581	4.04e-65	218	76.43
41670	XP_018162658.1	60.625	160	63	0	532	53	413	572	4.76e-64	215	72.5
41670	XP_013288974.1	58.993	139	57	0	532	116	439	577	2.45e-52	184	69.78
41670	XP_007728448.1	58.273	139	58	0	532	116	439	577	2.61e-52	184	70.5
41670	XP_022503372.1	58.273	139	58	0	532	116	419	557	3.88e-52	184	69.78
41670	XP_016630607.1	55.072	138	62	0	529	116	437	574	1.74e-50	179	71.01
41670	XP_007728606.1	47.333	150	79	0	532	83	466	615	1.73e-49	177	68
41670	XP_007740499.1	51.02	147	72	0	526	86	463	609	4.11e-49	176	66.67
41670	XP_023434926.1	50.336	149	74	0	532	86	445	593	8.87e-49	175	65.77
41670	XP_013253713.1	53.165	158	71	3	532	62	427	582	1.45e-48	174	67.09
41670	XP_016624812.1	49.66	147	74	0	526	86	462	608	2.96e-48	174	66.67
41670	XP_013276343.1	48.993	149	76	0	532	86	466	614	8.61e-48	173	64.43
41670	XP_007678648.1	46.875	160	84	1	529	50	445	603	9.36e-48	173	65.62
41670	XP_016265973.1	48.299	147	76	0	526	86	441	587	2.22e-47	171	65.99
41670	XP_016246210.1	47.651	149	78	0	526	80	451	599	2.45e-47	171	65.77
41670	XP_013254790.1	53.623	138	64	0	529	116	390	527	6e-47	169	68.84
41670	XP_007781022.1	49.693	163	79	2	532	50	432	593	9.53e-47	170	61.96
41670	XP_016632727.1	49.383	162	79	3	532	50	430	589	9.61e-47	170	67.28
41670	XP_013286752.1	48.322	149	77	0	532	86	461	609	1.47e-46	169	65.1
41670	XP_022506994.1	48.322	149	77	0	532	86	461	609	1.6e-46	169	65.1
41670	XP_022499501.1	48.322	149	77	0	532	86	462	610	1.79e-46	169	65.1
41670	XP_016641953.1	47.134	157	82	1	532	62	449	604	2.89e-46	169	68.15
41670	XP_016214435.1	45.625	160	86	1	529	50	451	609	3.33e-46	169	65
41670	XP_016635302.1	52.667	150	70	1	529	83	432	581	5.24e-46	168	65.33
41670	XP_013256570.1	51.007	149	72	1	526	83	452	600	8.03e-46	167	66.44
41670	XP_018695093.1	47.826	161	82	2	532	50	430	588	1e-45	167	67.08
41670	XP_013326137.1	50.35	143	71	0	532	104	446	588	1.27e-45	167	66.43
41670	XP_016249957.1	48.765	162	80	3	532	50	430	589	1.57e-45	166	66.67
41670	XP_007760446.1	49.383	162	80	2	529	47	434	594	1.94e-45	166	64.2
41670	XP_018690654.1	49.351	154	77	1	529	71	432	585	2.5e-45	166	65.58
41670	XP_007926244.1	45.638	149	81	0	532	86	396	544	5.66e-45	164	64.43
41670	XP_007739784.1	46.584	161	84	2	532	50	430	588	7.25e-45	165	66.46
41670	XP_016254250.1	50	150	74	1	529	83	432	581	7.95e-45	165	66
41670	XP_013262200.1	45.946	148	80	0	526	83	459	606	8.47e-45	165	64.86
41670	XP_016624969.1	50	150	74	1	529	83	432	581	1.03e-44	164	65.33
41670	XP_007740342.1	50	150	74	1	529	83	432	581	1.09e-44	164	65.33
41670	XP_014556645.1	48.408	157	74	1	532	62	417	566	1.17e-44	164	63.69
41670	XP_007717954.1	48.408	157	74	1	532	62	417	566	1.29e-44	164	63.69
41670	XP_016626071.1	47.239	163	83	3	532	47	430	590	1.32e-44	164	65.64
41670	XP_013321369.1	49.351	154	77	1	529	71	435	588	1.71e-44	164	62.99
41670	XP_016225287.1	47.403	154	80	1	529	71	432	585	1.98e-44	164	64.29
41670	XP_001790715.1	46.296	162	84	2	529	50	440	600	2.01e-44	164	61.11
41670	XP_022499777.1	49.333	150	75	1	529	83	428	577	3.94e-44	163	65.33
41670	XP_016625918.1	47.742	155	79	2	532	68	430	582	4.02e-44	162	67.1
41670	XP_022506834.1	49.333	150	75	1	529	83	457	606	5.04e-44	163	65.33
41670	XP_013285982.1	49.333	150	75	1	529	83	432	581	5.13e-44	162	65.33
41670	XP_008729758.1	48.701	154	78	1	529	71	410	563	5.24e-44	162	64.94
41670	XP_016223482.1	47.059	153	81	0	529	71	420	572	5.8e-44	162	65.36
41670	XP_018687701.1	50.694	144	70	1	529	101	463	606	6.52e-44	163	67.36
41670	XP_022503311.1	48.344	151	77	1	532	83	438	588	1.06e-43	162	67.55
41670	XP_016256499.1	47.333	150	78	1	532	83	519	667	1.06e-43	162	63.33
41670	XP_022498026.1	47.222	144	76	0	532	101	443	586	1.1e-43	162	66.67
41670	XP_022511091.1	48	150	77	1	529	83	432	581	1.11e-43	162	66.67
41670	XP_022515565.1	47.917	144	75	0	532	101	445	588	1.21e-43	162	65.97
41670	XP_023458346.1	47.682	151	77	2	532	86	406	556	1.46e-43	161	63.58
41670	XP_022515851.1	44.667	150	83	0	529	80	438	587	1.49e-43	161	66.67
41670	XP_013284932.1	44.667	150	83	0	529	80	438	587	1.84e-43	161	66.67
41670	XP_015700726.1	48.175	137	71	0	526	116	463	599	2.07e-43	161	67.88
41670	XP_003069726.1	47.482	139	73	0	532	116	412	550	2.18e-43	161	69.06
41670	XP_022504448.1	44.667	150	83	0	529	80	438	587	2.19e-43	160	66.67
41670	XP_010758110.1	48.175	137	71	0	526	116	462	598	2.51e-43	161	67.88
41670	XP_012214094.1	47.482	139	73	0	532	116	452	590	3.01e-43	161	69.06
41670	XP_013282141.1	47.222	144	76	0	532	101	437	580	3.05e-43	160	65.97
41670	XP_008717880.1	47.333	150	78	1	529	83	430	579	3.15e-43	160	66.67
41670	XP_008721468.1	46	150	81	0	532	83	460	609	3.22e-43	160	64
41670	XP_003839389.1	46.012	163	85	2	532	50	498	659	3.32e-43	161	60.12
41670	XP_016254086.1	51.079	139	67	1	529	116	477	615	3.53e-43	160	69.78
41670	XP_008725862.1	46.753	154	81	1	529	71	424	577	3.74e-43	160	64.94
41670	XP_023630719.1	45.455	154	84	0	532	71	442	595	4.26e-43	160	61.04
41670	XP_007731278.1	50	150	73	2	529	80	429	576	4.37e-43	160	65.33
41670	XP_022515438.1	51.079	139	67	1	529	116	509	647	4.41e-43	160	69.78
41670	XP_016624900.1	47.297	148	76	2	529	92	469	616	4.54e-43	160	69.59
41670	XP_013289047.1	47.682	151	78	1	532	83	433	583	4.66e-43	160	67.55
41670	XP_007299620.1	47.403	154	80	1	532	74	418	571	7.82e-43	159	66.88
41670	XP_022509591.1	48.322	149	76	1	526	83	452	600	8e-43	159	67.79
41670	XP_013267157.1	49.333	150	75	1	529	83	431	580	8.65e-43	159	62.67
41670	XP_023621513.1	46.711	152	78	1	532	86	413	564	1.29e-42	159	63.16
41670	XP_003853838.1	47.403	154	80	1	529	71	444	597	1.43e-42	159	61.69
41670	XP_007700928.1	41.071	168	80	1	532	86	17	184	1.72e-42	149	55.36
41670	XP_007748166.1	50	156	75	3	532	68	427	580	1.85e-42	158	66.03
41670	XP_016631464.1	47.097	155	80	2	532	71	422	575	2.04e-42	158	64.52
41670	XP_013266454.1	46.853	143	76	0	532	104	434	576	2.11e-42	158	67.13
41670	XP_007748820.1	45.455	143	78	0	532	104	331	473	2.16e-42	157	67.83
41670	XP_018033615.1	45.062	162	86	2	529	50	443	603	2.62e-42	158	61.11
41670	XP_016622198.1	47.552	143	75	0	532	104	437	579	4.41e-42	157	67.13
41670	XP_007760395.1	46.104	154	82	1	529	71	435	588	4.79e-42	157	64.29
41670	XP_013255348.1	42.857	154	88	0	529	68	471	624	5.51e-42	157	63.64
41670	XP_018388131.1	46.753	154	80	1	529	74	440	593	6.58e-42	157	61.04
41670	XP_018002741.1	45.139	144	79	0	532	101	435	578	8.5e-42	157	68.75
41670	XP_018691294.1	49.64	139	69	1	529	116	469	607	1.12e-41	157	67.63
41670	XP_007749541.1	47.222	144	76	0	532	101	437	580	1.35e-41	156	64.58
41674	XP_020073625.1	91.525	59	5	0	542	366	192	250	2.61e-30	120	98.31
41674	XP_019037981.1	79.661	59	12	0	542	366	198	256	1.4e-26	111	94.92
41674	XP_011277268.1	76.271	59	14	0	542	366	203	261	3.88e-25	107	93.22
41674	XP_018986413.1	77.966	59	13	0	542	366	193	251	6.85e-24	105	88.14
41674	XP_002494665.1	72.881	59	16	0	542	366	206	264	5.9e-22	99	86.44
41674	XP_003681692.1	74.576	59	15	0	542	366	202	260	1.01e-21	98.6	83.05
41674	XP_002491286.1	72.881	59	16	0	542	366	202	260	1.49e-21	98.2	88.14
41674	NP_984764.1	72.881	59	16	0	542	366	197	255	3.36e-21	97.1	84.75
41674	XP_003648101.1	69.492	59	18	0	542	366	207	265	4.61e-20	94	84.75
41674	XP_449392.1	69.492	59	18	0	542	366	204	262	7.41e-20	93.6	81.36
41674	XP_002553614.1	71.186	59	17	0	542	366	207	265	7.6e-20	93.6	83.05
41674	XP_003685301.1	71.186	59	17	0	542	366	209	267	1.31e-19	93.2	83.05
41674	XP_017986774.1	69.492	59	18	0	542	366	205	263	1.39e-19	92.8	83.05
41674	XP_022628565.1	71.186	59	17	0	542	366	207	265	1.75e-19	92.4	83.05
41674	XP_022676086.1	67.797	59	19	0	542	366	200	258	5.41e-19	91.3	83.05
41674	XP_001646518.1	64.407	59	21	0	542	366	204	262	6.48e-19	90.9	83.05
41674	XP_004177654.1	67.797	59	19	0	542	366	202	260	1.06e-18	90.1	84.75
41674	XP_013935134.1	64.407	59	21	0	542	366	193	251	2.16e-18	89.7	84.75
41674	XP_019016995.1	67.797	59	19	0	542	366	209	267	2.38e-18	89.7	83.05
41674	XP_018210731.1	64.407	59	21	0	542	366	193	251	4.28e-18	89	84.75
41674	XP_456043.1	66.102	59	20	0	542	366	200	258	5.21e-18	88.6	79.66
41674	XP_018223880.1	64.407	59	21	0	542	366	206	264	5.82e-18	88.6	81.36
41674	NP_010624.3	64.407	59	21	0	542	366	206	264	7.46e-18	88.2	81.36
41674	XP_020546594.1	66.102	59	20	0	542	366	206	264	2.98e-17	86.7	81.36
41674	XP_003677145.1	64.407	59	21	0	542	366	203	261	2.75e-16	83.6	79.66
41674	XP_001482277.1	62.712	59	22	0	542	366	214	272	4.63e-16	83.6	86.44
41674	XP_022463873.1	61.017	59	23	0	542	366	206	264	5.85e-16	83.2	81.36
41674	XP_020048741.1	59.649	57	23	0	536	366	169	225	1.35e-15	81.3	80.7
41674	XP_003866126.1	62.712	59	22	0	542	366	218	276	1.78e-15	82	84.75
41674	XP_020073995.1	61.017	59	23	0	542	366	219	277	2.16e-15	82	81.36
41674	XP_022457143.1	59.322	59	24	0	542	366	208	266	4.47e-15	80.9	81.36
41674	XP_001386736.1	61.017	59	23	0	542	366	223	281	1.31e-14	79.7	79.66
41674	XP_002546166.1	61.017	59	23	0	542	366	220	278	2.13e-14	79.3	79.66
41674	XP_007374070.1	59.322	59	24	0	542	366	226	284	2.8e-14	79	81.36
41674	XP_718188.1	61.017	59	23	0	542	366	224	282	3.59e-14	78.6	77.97
41674	XP_002421732.1	61.017	59	23	0	542	366	224	282	4.76e-14	78.2	77.97
41674	XP_003669356.1	66.038	53	18	0	542	384	203	255	7.8e-14	77	79.25
41674	XP_020065002.1	59.322	59	24	0	542	366	216	274	1.15e-13	77	76.27
41674	XP_001527671.1	57.627	59	25	0	542	366	218	276	1.73e-13	76.6	81.36
41674	XP_003957213.1	62.264	53	20	0	542	384	202	254	5.4e-13	74.7	75.47
41674	XP_015467041.1	54.237	59	27	0	542	366	213	271	1e-12	74.7	81.36
41674	XP_457919.1	52.542	59	28	0	542	366	213	271	1.02e-11	71.6	79.66
41674	XP_018167417.2	55.932	59	26	0	542	366	212	270	2.24e-11	70.9	76.27
41674	XP_006688303.1	55.932	59	26	0	542	366	210	268	2.27e-11	70.9	76.27
41674	XP_018714881.1	50.847	59	29	0	542	366	216	274	3.82e-11	70.1	77.97
41674	XP_018737314.1	51.724	58	28	0	542	369	199	256	1.99e-10	68.2	68.97
41674	XP_002619269.1	70	40	12	0	542	423	213	252	1.39e-08	62.8	82.5
41674	XP_502218.1	42.857	56	32	0	536	369	211	266	2.55e-06	56.6	64.29
41678	XP_019037450.1	89.286	28	3	0	85	2	23	50	3.03e-12	56.6	100
41678	XP_019037450.1	80.952	21	4	0	210	148	3	23	3.03e-12	42	90.48
41678	XP_020049082.1	89.286	28	3	0	85	2	22	49	2.85e-10	53.9	96.43
41678	XP_020049082.1	66.667	21	7	0	210	148	2	22	2.85e-10	37.7	80.95
41678	XP_018984703.1	92.857	28	2	0	85	2	20	47	6.17e-10	56.2	100
41678	XP_018984703.1	72.222	18	5	0	201	148	3	20	6.17e-10	34.7	94.44
41678	XP_011273224.1	86.486	37	3	1	112	2	10	44	7.53e-09	63.5	89.19
41678	XP_002624227.1	75	28	7	0	85	2	23	50	7.91e-08	46.6	89.29
41678	XP_002624227.1	71.429	21	6	0	210	148	3	23	7.91e-08	37	90.48
41678	XP_001541876.1	75	28	7	0	85	2	23	50	2.2e-07	46.2	89.29
41678	XP_001541876.1	70	20	6	0	207	148	4	23	2.2e-07	35.8	90
41678	XP_002797508.1	75	28	7	0	85	2	23	50	2.39e-07	46.6	89.29
41678	XP_002797508.1	70	20	6	0	207	148	4	23	2.39e-07	35.4	85
41678	XP_018704738.1	71.429	28	8	0	85	2	22	49	2.8e-07	42.7	85.71
41678	XP_018704738.1	83.333	18	3	0	204	151	4	21	2.8e-07	38.9	94.44
41678	XP_015403560.1	82.143	28	5	0	85	2	22	49	3.53e-07	48.9	89.29
41678	XP_015403560.1	61.905	21	8	0	210	148	2	22	3.53e-07	32.3	76.19
41678	XP_022484555.1	78.571	28	6	0	85	2	21	48	6.23e-07	48.1	89.29
41678	XP_022484555.1	60	20	8	0	207	148	2	21	6.23e-07	32.3	80
41678	XP_001817497.1	81.481	27	5	0	82	2	23	49	6.87e-07	47	88.89
41678	XP_001817497.1	66.667	21	7	0	210	148	2	22	6.87e-07	33.5	80.95
41678	XP_002846337.1	78.571	28	6	0	85	2	22	49	7.18e-07	46.2	85.71
41678	XP_002846337.1	61.905	21	8	0	210	148	2	22	7.18e-07	33.9	80.95
41678	XP_016602008.1	78.571	28	6	0	85	2	21	48	7.7e-07	48.5	89.29
41678	XP_016602008.1	60	20	8	0	207	148	2	21	7.7e-07	32	80
41678	XP_022394362.1	82.143	28	5	0	85	2	22	49	8.56e-07	48.9	89.29
41678	XP_022394362.1	66.667	18	6	0	201	148	5	22	8.56e-07	30.8	83.33
41678	XP_022581569.1	78.571	28	6	0	85	2	22	49	8.75e-07	47.4	92.86
41678	XP_022581569.1	57.143	21	9	0	210	148	2	22	8.75e-07	32.7	80.95
41678	XP_003020876.1	77.778	27	6	0	85	5	22	48	1.36e-06	44.3	85.19
41678	XP_003020876.1	66.667	21	7	0	210	148	2	22	1.36e-06	35	80.95
41678	XP_003013127.1	77.778	27	6	0	85	5	22	48	1.38e-06	44.3	85.19
41678	XP_003013127.1	66.667	21	7	0	210	148	2	22	1.38e-06	35	80.95
41678	XP_002562724.1	78.571	28	6	0	85	2	21	48	1.52e-06	48.1	89.29
41678	XP_002562724.1	55	20	9	0	207	148	2	21	1.52e-06	31.2	80
41678	XP_003236739.1	77.778	27	6	0	85	5	22	48	1.59e-06	44.3	85.19
41678	XP_003236739.1	66.667	21	7	0	210	148	2	22	1.59e-06	34.7	80.95
41678	XP_016645515.1	74.074	27	7	0	82	2	26	52	1.78e-06	43.5	85.19
41678	XP_016645515.1	54.167	24	11	0	222	151	1	24	1.78e-06	35.4	75
41678	XP_018175611.1	71.429	28	8	0	85	2	22	49	1.92e-06	42	82.14
41678	XP_018175611.1	66.667	21	7	0	210	148	2	22	1.92e-06	37	85.71
41678	XP_007734619.1	75	28	7	0	85	2	22	49	1.96e-06	43.1	89.29
41678	XP_007734619.1	71.429	21	6	0	210	148	2	22	1.96e-06	35.8	90.48
41678	XP_003067657.1	78.571	28	6	0	85	2	22	49	2e-06	46.6	85.71
41678	XP_003067657.1	63.158	19	7	0	204	148	4	22	2e-06	32.3	84.21
41678	XP_006696784.1	77.778	27	6	0	82	2	24	50	2.03e-06	45.1	85.19
41678	XP_006696784.1	70	20	6	0	210	151	3	22	2.03e-06	33.5	85
41678	XP_013947308.1	71.429	28	8	0	85	2	22	49	2.67e-06	43.1	89.29
41678	XP_013947308.1	61.905	21	8	0	210	148	2	22	2.67e-06	35.4	85.71
41678	XP_002148700.1	75	28	7	0	85	2	22	49	2.8e-06	45.8	89.29
41678	XP_002148700.1	57.143	21	9	0	210	148	2	22	2.8e-06	32.3	85.71
41678	XP_018139849.1	71.429	28	8	0	85	2	22	49	2.97e-06	42.4	82.14
41678	XP_018139849.1	61.905	21	8	0	210	148	2	22	2.97e-06	35.8	80.95
41678	XP_003001505.1	71.429	28	8	0	85	2	24	51	3.14e-06	42.4	92.86
41678	XP_003001505.1	62.5	24	9	0	219	148	1	24	3.14e-06	35.8	79.17
41678	XP_014545661.1	71.429	28	8	0	85	2	22	49	3.15e-06	42	82.14
41678	XP_014545661.1	61.905	21	8	0	210	148	2	22	3.15e-06	36.2	80.95
41678	XP_007810628.1	71.429	28	8	0	85	2	22	49	3.2e-06	42	82.14
41678	XP_007810628.1	61.905	21	8	0	210	148	2	22	3.2e-06	36.2	80.95
41678	XP_009655891.1	71.429	28	8	0	85	2	24	51	3.52e-06	42	92.86
41678	XP_009655891.1	62.5	24	9	0	219	148	1	24	3.52e-06	35.8	79.17
41678	XP_009161559.1	77.778	27	6	0	82	2	23	49	3.61e-06	43.5	88.89
41678	XP_009161559.1	66.667	21	7	0	210	148	2	22	3.61e-06	34.3	85.71
41678	XP_003720363.1	74.074	27	7	0	82	2	25	51	3.69e-06	44.7	85.19
41678	XP_003720363.1	56.522	23	10	0	219	151	1	23	3.69e-06	33.1	73.91
41678	XP_003175006.1	77.778	27	6	0	85	5	22	48	4.15e-06	44.3	85.19
41678	XP_003175006.1	61.905	21	8	0	210	148	2	22	4.15e-06	33.5	76.19
41678	XP_016229515.1	77.778	27	6	0	82	2	23	49	4.21e-06	43.9	88.89
41678	XP_016229515.1	70	20	6	0	207	148	3	22	4.21e-06	33.9	85
41678	XP_022496722.1	77.778	27	6	0	82	2	23	49	4.32e-06	44.3	88.89
41678	XP_022496722.1	70	20	6	0	207	148	3	22	4.32e-06	33.1	80
41678	XP_001246026.2	75	28	7	0	85	2	22	49	4.39e-06	45.4	85.71
41678	XP_001246026.2	63.158	19	7	0	204	148	4	22	4.39e-06	32.3	84.21
41678	XP_023925554.1	75	28	7	0	85	2	22	49	4.46e-06	43.9	89.29
41678	XP_023925554.1	66.667	21	7	0	210	148	2	22	4.46e-06	33.9	85.71
41678	XP_007722884.1	75	28	7	0	85	2	22	49	4.53e-06	43.1	89.29
41678	XP_007722884.1	66.667	21	7	0	210	148	2	22	4.53e-06	34.3	85.71
41678	XP_018134041.1	71.429	28	8	0	85	2	24	51	4.67e-06	42.4	89.29
41678	XP_018134041.1	58.333	24	10	0	219	148	1	24	4.67e-06	35	79.17
41678	XP_013319181.1	77.778	27	6	0	82	2	23	49	5.51e-06	43.5	88.89
41678	XP_013319181.1	66.667	21	7	0	210	148	2	22	5.51e-06	33.9	80.95
41678	XP_006669858.1	71.429	28	8	0	85	2	22	49	5.6e-06	41.6	85.71
41678	XP_006669858.1	78.947	19	4	0	204	148	4	22	5.6e-06	35.4	84.21
41678	XP_016234341.1	77.778	27	6	0	82	2	23	49	6.07e-06	43.1	88.89
41678	XP_016234341.1	66.667	21	7	0	210	148	2	22	6.07e-06	33.9	80.95
41678	XP_018663372.1	71.429	28	8	0	85	2	22	49	6.43e-06	43.1	89.29
41678	XP_018663372.1	63.158	19	7	0	204	148	4	22	6.43e-06	33.9	89.47
41678	XP_001224445.1	77.778	27	6	0	82	2	26	52	7.93e-06	44.7	85.19
41678	XP_001224445.1	56	25	10	1	219	148	1	25	7.93e-06	32	80
41678	XP_002485542.1	67.857	28	9	0	85	2	49	76	8.05e-06	40.8	85.71
41678	XP_002485542.1	45.238	42	22	1	273	148	9	49	8.05e-06	35.8	64.29
41678	XP_020056152.1	71.429	28	8	0	85	2	22	49	8.58e-06	45.4	89.29
41678	XP_020056152.1	57.143	21	9	0	210	148	2	22	8.58e-06	31.2	76.19
41678	XP_020122486.1	75	28	7	0	85	2	23	50	8.72e-06	44.7	85.71
41678	XP_020122486.1	57.143	21	9	0	210	148	3	23	8.72e-06	32	80.95
41678	XP_018188905.1	71.429	28	8	0	85	2	22	49	8.98e-06	44.3	92.86
41678	XP_018188905.1	57.143	21	9	0	210	148	2	22	8.98e-06	32.3	80.95
41678	XP_016246350.1	74.074	27	7	0	82	2	23	49	9.19e-06	43.1	88.89
41678	XP_016246350.1	70	20	6	0	207	148	3	22	9.19e-06	33.1	80
41678	XP_006961735.1	71.429	28	8	0	85	2	22	49	9.64e-06	42.7	89.29
41678	XP_006961735.1	57.143	21	9	0	210	148	2	22	9.64e-06	33.9	80.95
41678	XP_022517404.1	74.074	27	7	0	82	2	23	49	1.04e-05	43.1	88.89
41678	XP_022517404.1	70	20	6	0	207	148	3	22	1.04e-05	33.1	80
41678	XP_018688396.1	74.074	27	7	0	82	2	23	49	1.05e-05	43.1	88.89
41678	XP_018688396.1	70	20	6	0	207	148	3	22	1.05e-05	33.5	80
41678	XP_013286925.1	74.074	27	7	0	82	2	23	49	1.06e-05	43.1	88.89
41678	XP_013286925.1	70	20	6	0	207	148	3	22	1.06e-05	33.1	80
41678	XP_016631769.1	74.074	27	7	0	82	2	23	49	1.1e-05	43.1	88.89
41678	XP_016631769.1	70	20	6	0	207	148	3	22	1.1e-05	33.1	80
41678	XP_007744783.1	74.074	27	7	0	82	2	23	49	1.17e-05	42.7	88.89
41678	XP_007744783.1	70	20	6	0	207	148	3	22	1.17e-05	33.1	80
41678	XP_013330322.1	75	28	7	0	85	2	22	49	1.23e-05	44.3	89.29
41678	XP_013330322.1	57.143	21	9	0	210	148	2	22	1.23e-05	32	80.95
41678	XP_008598745.1	70.37	27	8	0	82	2	23	49	1.31e-05	39.3	85.19
41678	XP_008598745.1	70	20	6	0	210	151	2	21	1.31e-05	36.6	90
41678	XP_001273407.1	75	28	7	0	85	2	22	49	1.35e-05	45.8	89.29
41678	XP_001273407.1	61.905	21	8	0	210	148	2	22	1.35e-05	30	76.19
41678	XP_008097792.1	71.429	28	8	0	85	2	27	54	1.36e-05	42.4	85.71
41678	XP_008097792.1	52.174	23	11	0	216	148	5	27	1.36e-05	33.5	82.61
41678	XP_003653706.1	74.074	27	7	0	82	2	26	52	1.67e-05	42	81.48
41678	XP_003653706.1	60	25	9	1	219	148	1	25	1.67e-05	33.5	80
41678	XP_016212556.1	67.857	28	9	0	85	2	78	105	1.72e-05	43.5	92.86
41678	XP_016212556.1	60	20	8	0	207	148	59	78	1.72e-05	32	85
41678	XP_007805884.1	74.074	27	7	0	82	2	23	49	1.76e-05	46.2	96.3
41678	XP_007805884.1	57.143	21	9	0	210	148	2	22	1.76e-05	29.3	76.19
41678	XP_009219557.1	74.074	27	7	0	82	2	26	52	1.76e-05	42.7	85.19
41678	XP_009219557.1	57.143	21	9	0	213	151	4	24	1.76e-05	33.1	80.95
41678	XP_007832016.1	70.37	27	8	0	82	2	26	52	1.9e-05	40.4	88.89
41678	XP_007832016.1	68	25	7	1	219	148	1	25	1.9e-05	35	76
41678	XP_016259707.1	74.074	27	7	0	82	2	23	49	1.91e-05	41.6	88.89
41678	XP_016259707.1	66.667	21	7	0	210	148	2	22	1.91e-05	33.9	80.95
41678	XP_023872700.1	75	28	7	0	85	2	22	49	1.97e-05	43.5	89.29
41678	XP_023872700.1	57.143	21	9	0	210	148	2	22	1.97e-05	32	80.95
41678	XP_014171647.1	74.074	27	7	0	82	2	23	49	1.97e-05	42.7	81.48
41678	XP_014171647.1	63.158	19	7	0	207	151	3	21	1.97e-05	32.7	84.21
41678	XP_014534547.1	71.429	28	8	0	85	2	21	48	2.31e-05	43.9	89.29
41678	XP_014534547.1	55	20	9	0	207	148	2	21	2.31e-05	31.2	80
41678	XP_016621431.1	74.074	27	7	0	82	2	23	49	2.39e-05	43.1	88.89
41678	XP_016621431.1	65	20	7	0	207	148	3	22	2.39e-05	32	80
41678	XP_007778965.1	67.857	28	9	0	85	2	23	50	3.39e-05	41.6	89.29
41678	XP_007778965.1	62.5	24	8	1	219	148	1	23	3.39e-05	33.1	83.33
41678	XP_001584979.1	71.429	28	8	0	85	2	23	50	3.85e-05	42.4	89.29
41678	XP_001584979.1	61.905	21	8	0	210	148	3	23	3.85e-05	32	76.19
41678	XP_020130714.1	67.857	28	9	0	85	2	22	49	4.29e-05	41.6	89.29
41678	XP_020130714.1	57.143	21	9	0	210	148	2	22	4.29e-05	32.7	85.71
41678	XP_013958552.1	71.429	28	8	0	85	2	22	49	4.88e-05	43.1	89.29
41678	XP_013958552.1	61.111	18	7	0	201	148	5	22	4.88e-05	31.2	88.89
41678	XP_013260161.1	71.429	28	8	0	85	2	22	49	5e-05	43.1	89.29
41678	XP_013260161.1	55	20	9	0	207	148	3	22	5e-05	30.8	85
41678	XP_001215541.1	71.429	28	8	0	85	2	22	49	5.13e-05	41.6	85.71
41678	XP_001215541.1	61.905	21	8	0	210	148	2	22	5.13e-05	32.7	80.95
41678	XP_460484.2	64.286	28	10	0	85	2	21	48	6.69e-05	45.1	85.71
41678	XP_460484.2	68.75	16	5	0	195	148	6	21	6.69e-05	28.5	87.5
41678	XP_015466578.1	64.286	28	10	0	85	2	21	48	8.2e-05	44.7	85.71
41678	XP_015466578.1	68.75	16	5	0	195	148	6	21	8.2e-05	28.5	87.5
41678	XP_008088489.1	71.429	28	8	0	85	2	23	50	8.54e-05	42	89.29
41678	XP_008088489.1	52.381	21	10	0	210	148	3	23	8.54e-05	31.2	76.19
41678	XP_008026117.1	64.286	28	10	0	85	2	49	76	8.78e-05	40.8	85.71
41678	XP_008026117.1	48	25	13	0	222	148	25	49	8.78e-05	32.3	76
41678	XP_018161480.1	71.429	28	8	0	85	2	56	83	9.03e-05	42.4	85.71
41678	XP_018161480.1	47.826	23	12	0	216	148	34	56	9.03e-05	30.8	78.26
41678	XP_007761598.1	74.074	27	7	0	82	2	23	49	9.71e-05	41.2	85.19
41678	XP_007761598.1	68.421	19	6	0	204	148	4	22	9.71e-05	32	78.95
41678	XP_003842702.1	67.857	28	9	0	85	2	25	52	9.81e-05	41.6	89.29
41678	XP_003842702.1	60	20	8	0	207	148	6	25	9.81e-05	31.6	85
41678	XP_008731901.1	74.074	27	7	0	82	2	23	49	0.000105	41.2	85.19
41678	XP_008731901.1	68.421	19	6	0	204	148	4	22	0.000105	32	78.95
41678	XP_007922663.1	70.37	27	8	0	85	5	22	48	0.000105	40.4	88.89
41678	XP_007922663.1	61.905	21	8	0	210	148	2	22	0.000105	32.7	80.95
41678	XP_009261818.1	70.37	27	8	0	82	2	67	93	0.000108	39.7	81.48
41678	XP_009261818.1	60	20	8	0	210	151	46	65	0.000108	33.5	85
41678	XP_011321403.1	70.37	27	8	0	82	2	23	49	0.000109	39.7	81.48
41678	XP_011321403.1	60	20	8	0	210	151	2	21	0.000109	33.5	85
41678	XP_001547201.1	71.429	28	8	0	85	2	23	50	0.000132	42.4	89.29
41678	XP_001547201.1	52.381	21	10	0	210	148	3	23	0.000132	30.4	80.95
41678	XP_003663631.1	74.074	27	7	0	82	2	26	52	0.000136	42	81.48
41678	XP_003663631.1	55	20	9	0	207	148	6	25	0.000136	30.4	80
41678	XP_019019110.1	67.857	28	9	0	85	2	21	48	0.000146	43.1	85.71
41678	XP_019019110.1	84.615	13	2	0	186	148	9	21	0.000146	29.3	100
41678	XP_008713985.1	71.429	28	8	0	85	2	22	49	0.000153	42	92.86
41678	XP_008713985.1	50	20	10	0	207	148	3	22	0.000153	30.4	80
41678	XP_001935456.1	67.857	28	9	0	85	2	22	49	0.000191	42	89.29
41678	XP_001935456.1	61.111	18	7	0	201	148	5	22	0.000191	30	88.89
41678	XP_018384916.1	67.857	28	9	0	85	2	22	49	0.000198	41.6	89.29
41678	XP_018384916.1	61.111	18	7	0	201	148	5	22	0.000198	30.4	88.89
41678	XP_018070815.1	71.429	28	8	0	85	2	23	50	0.000241	42	89.29
41678	XP_018070815.1	50	22	11	0	213	148	2	23	0.000241	29.6	72.73
41678	XP_018757636.1	70.37	27	8	0	82	2	70	96	0.000242	39.3	81.48
41678	XP_018757636.1	55	20	9	0	210	151	49	68	0.000242	32.3	85
41678	XP_023435602.1	70.37	27	8	0	82	2	68	94	0.000243	39.3	81.48
41678	XP_023435602.1	55	20	9	0	210	151	47	66	0.000243	32.3	85
41678	XP_018249595.1	70.37	27	8	0	82	2	66	92	0.000246	39.3	81.48
41678	XP_018249595.1	55	20	9	0	210	151	45	64	0.000246	32.3	85
41678	XP_018031307.1	65.385	26	9	0	82	5	23	48	0.000247	38.1	80.77
41678	XP_018031307.1	65	20	7	0	207	148	3	22	0.000247	33.5	85
41678	XP_017994688.1	71.429	28	8	0	85	2	22	49	0.00025	42.4	89.29
41678	XP_017994688.1	50	20	10	0	207	148	3	22	0.00025	29.3	80
41678	XP_001796245.1	64.286	28	10	0	85	2	22	49	0.000367	42	89.29
41678	XP_001796245.1	55.556	18	8	0	201	148	5	22	0.000367	29.3	88.89
41682	XP_002041847.1	90.854	164	15	0	2	493	336	499	4.61e-105	319	95.12
41682	XP_002044851.1	63.846	130	45	1	95	484	59	186	8.02e-55	181	75.38
41682	XP_015120763.1	41.228	114	67	0	74	415	192	305	1.99e-24	106	57.89
41682	XP_014274844.1	36.8	125	79	0	113	487	5	129	2.33e-24	102	56.8
41682	XP_023316149.1	39.416	137	83	0	74	484	209	345	4.39e-24	105	55.47
41682	XP_002029243.1	41.071	112	62	1	17	340	45	156	1.14e-22	99	62.5
41682	XP_017481623.1	42.609	115	65	1	44	385	11	125	5.51e-22	101	56.52
41682	XP_015509714.1	33.333	141	94	0	50	472	593	733	1.62e-21	100	52.48
41682	XP_014759163.1	35.821	134	81	2	74	472	83	212	2.7e-21	95.9	54.48
41682	XP_002134706.2	35.862	145	72	4	2	373	103	247	1.56e-20	94.7	55.17
41682	XP_002028762.1	33.548	155	88	3	17	469	45	188	3.1e-20	92.8	52.9
41682	XP_002029168.1	39.252	107	61	1	32	340	122	228	4.53e-20	94	60.75
41682	XP_015124671.1	39.474	114	69	0	131	472	158	271	1.79e-19	92.8	55.26
41682	XP_018493982.1	34.667	150	90	3	80	508	147	295	2.01e-19	93.2	50.67
41682	XP_015438039.1	35.385	130	83	1	83	472	800	928	6.86e-19	93.6	51.54
41682	XP_022161493.1	38.318	107	65	1	83	400	140	246	7.66e-19	90.5	53.27
41682	XP_002016772.1	40.945	127	73	2	32	406	97	223	1.38e-18	92	55.12
41682	XP_014282374.1	39.252	107	65	0	35	355	47	153	1.8e-18	87.4	57.94
41682	XP_015116123.1	38.739	111	68	0	83	415	235	345	3.42e-18	90.5	52.25
41682	XP_014274395.1	35.043	117	76	0	35	385	56	172	1.62e-17	85.5	52.99
41682	XP_017474738.1	38.889	90	54	1	50	316	97	186	1.92e-17	85.1	61.11
41682	XP_015376188.1	32.857	140	91	2	35	454	126	262	3.15e-17	86.7	50
41682	XP_022161158.1	36.154	130	82	1	38	424	16	145	4.36e-17	85.1	50.77
41682	XP_008184868.1	36.19	105	67	0	50	364	40	144	4.83e-17	84.3	54.29
41682	XP_015119086.1	44.048	84	47	0	74	325	37	120	1.16e-16	81.6	58.33
41682	XP_014760041.1	42	100	57	1	80	376	139	238	1.28e-16	84.3	57
41682	XP_015376934.1	34.579	107	70	0	80	400	94	200	1.96e-16	83.6	56.07
41682	XP_015378372.1	33.645	107	71	0	80	400	36	142	2.6e-16	82	55.14
41682	XP_012235910.1	34.559	136	85	2	5	400	148	283	3.54e-16	84.7	50
41682	XP_023028291.1	32.09	134	89	2	74	472	428	560	4.69e-16	85.1	51.49
41682	XP_018569138.1	27.703	148	104	3	47	484	131	277	7.62e-16	82.8	53.38
41682	XP_017773701.1	37.143	105	65	1	95	409	41	144	8.6e-16	80.5	52.38
41682	XP_002026532.1	31.618	136	85	1	53	460	625	752	1.06e-15	84.3	50.74
41682	XP_023228603.1	38.636	88	54	0	83	346	168	255	1.16e-15	82.4	63.64
41682	XP_016661214.1	39.048	105	57	2	74	367	155	259	1.55e-15	82.4	55.24
41682	XP_012218589.1	33.803	142	89	2	5	421	50	189	2.41e-15	80.5	48.59
41682	XP_002028715.1	49.206	63	32	0	80	268	38	100	4.03e-15	78.6	66.67
41682	XP_023311621.1	33.835	133	79	3	2	376	75	206	4.48e-15	80.1	51.13
41682	XP_015114949.1	33.898	118	76	1	125	472	39	156	5.18e-15	78.2	53.39
41682	XP_023228612.1	37.5	88	55	0	83	346	168	255	5.19e-15	80.9	63.64
41682	XP_008181108.1	38.144	97	59	1	35	325	743	838	7.4e-15	82	55.67
41682	XP_023314129.1	40	95	57	0	74	358	83	177	7.51e-15	78.2	58.95
41682	XP_008203275.1	36.264	91	58	0	134	406	109	199	2.36e-14	78.2	60.44
41682	XP_008189670.1	35.644	101	59	1	83	367	1	101	3.09e-14	76.6	54.46
41682	XP_012215832.1	35.433	127	78	2	32	400	59	185	3.59e-14	77.8	48.03
41682	XP_008188703.1	35.644	101	59	1	83	367	41	141	3.63e-14	77	54.46
41682	XP_012217589.1	35.593	118	75	1	50	400	68	185	3.65e-14	77.8	52.54
41682	XP_015376403.1	39.56	91	53	1	50	316	107	197	3.77e-14	76.6	54.95
41682	XP_015113968.1	35.185	108	70	0	149	472	121	228	3.88e-14	77.4	54.63
41682	XP_002136112.2	40.789	76	45	0	56	283	55	130	4.06e-14	75.5	57.89
41682	XP_012285636.1	36.634	101	64	0	47	349	80	180	4.18e-14	76.3	51.49
41682	XP_017770112.1	31.667	120	81	1	41	400	88	206	5.91e-14	77.4	50.83
41682	XP_023218574.1	32.727	110	73	1	20	349	129	237	8.88e-14	77.4	53.64
41682	XP_018577865.1	40	90	51	2	5	274	22	108	8.95e-14	73.9	56.67
41682	XP_014361324.1	36.449	107	64	1	113	421	149	255	1.15e-13	76.6	54.21
41682	XP_008184255.1	30.4	125	85	1	17	385	21	145	1.67e-13	75.1	49.6
41682	XP_015120345.1	31.579	133	83	1	74	472	8	132	1.87e-13	77	45.11
41682	XP_008189461.1	34.694	98	62	1	74	361	38	135	2.01e-13	74.7	55.1
41682	XP_016660286.1	36.111	108	67	1	44	361	102	209	2.06e-13	76.3	50
41682	XP_014220341.1	38.298	94	58	0	35	316	72	165	2.14e-13	73.9	52.13
41682	XP_015111507.1	33.036	112	75	0	137	472	650	761	2.22e-13	77.8	53.57
41682	XP_023219941.1	31.579	114	77	1	8	349	125	237	2.87e-13	76.3	52.63
41682	XP_023211396.1	34.343	99	65	0	50	346	307	405	3.48e-13	76.6	53.54
41682	XP_015368193.1	33.945	109	70	1	41	361	33	141	5.98e-13	73.9	50.46
41682	XP_013182760.1	35.965	114	72	1	83	421	102	215	8.59e-13	74.3	50.88
41682	XP_015044530.1	42.254	71	41	0	53	265	65	135	9.23e-13	71.6	60.56
41682	XP_012235909.1	30.833	120	79	1	53	400	67	186	1.13e-12	73.6	52.5
41682	XP_012218591.1	33.858	127	80	2	32	400	132	258	1.17e-12	73.9	48.03
41682	XP_012218089.1	37	100	62	1	104	400	4	103	1.19e-12	70.9	52
41682	XP_023244854.1	32.558	129	73	4	83	454	86	205	1.25e-12	73.2	55.04
41682	XP_012217918.1	36.441	118	74	1	50	400	118	235	1.41e-12	74.3	48.31
41682	XP_023223714.1	36.364	88	56	0	83	346	570	657	2.19e-12	74.7	56.82
41682	XP_015375514.1	29.771	131	90	2	65	451	9	139	2.33e-12	71.2	48.85
41682	XP_023244577.1	32.653	98	66	0	53	346	311	408	2.37e-12	74.3	58.16
41682	XP_015375518.1	41.333	75	44	0	50	274	60	134	2.52e-12	70.5	54.67
41682	XP_011145672.1	34.444	90	59	0	131	400	16	105	2.64e-12	71.2	54.44
41682	XP_023027791.1	32.692	104	69	1	65	373	103	206	3.06e-12	72.4	50.96
41682	XP_023235537.1	33	100	66	1	50	349	199	297	3.39e-12	73.6	52
41682	XP_015024155.1	34.862	109	55	3	74	400	67	159	3.86e-12	70.5	49.54
41682	XP_008181211.1	32.061	131	85	1	104	484	56	186	4.46e-12	71.2	50.38
41682	XP_015367729.1	33.636	110	71	1	38	361	31	140	4.53e-12	71.6	50
41682	XP_023238381.1	31.579	114	77	1	8	349	291	403	4.86e-12	73.6	51.75
41682	XP_023214175.1	36.364	88	56	0	83	346	361	448	7.22e-12	73.2	56.82
41682	XP_023934932.1	31.967	122	81	1	47	406	170	291	7.54e-12	72.4	49.18
41682	XP_015023594.1	35.78	109	54	3	74	400	55	147	1.08e-11	69.3	49.54
41682	XP_015023621.1	35.78	109	54	3	74	400	67	159	1.1e-11	69.3	49.54
41682	XP_023244413.1	35.87	92	59	0	68	343	1062	1153	1.18e-11	72.8	52.17
41682	XP_023223762.1	35.227	88	57	0	83	346	300	387	1.4e-11	72	57.95
41682	XP_015379064.1	33.654	104	67	1	56	361	75	178	1.46e-11	70.9	51.92
41682	XP_012216978.1	34.545	110	71	1	50	376	68	177	1.62e-11	69.3	51.82
41682	XP_014219016.1	32.331	133	90	0	2	400	92	224	1.63e-11	70.5	48.12
41682	XP_022166025.1	36.471	85	54	0	50	304	103	187	2.04e-11	69.7	51.76
41682	XP_015024156.1	33.945	109	56	3	74	400	67	159	2.16e-11	68.6	48.62
41682	XP_013173114.1	34.848	132	82	2	29	421	87	215	2.29e-11	72	49.24
41682	XP_015024159.1	34.375	96	54	1	74	361	65	151	2.3e-11	68.6	48.96
41682	XP_014361325.1	34.783	115	71	1	137	481	23	133	3.1e-11	68.6	47.83
41682	XP_015368634.1	40.789	76	44	1	188	412	1	76	4e-11	66.6	60.53
41682	XP_014299688.1	32.11	109	74	0	83	409	523	631	4.45e-11	70.9	50.46
41682	XP_021182315.1	31.746	126	85	1	83	457	36	161	4.7e-11	68.9	46.83
41682	XP_018496318.1	33.036	112	69	2	74	406	50	156	4.91e-11	68.6	50
41688	XP_018986799.1	84.722	72	11	0	216	1	253	324	8.32e-36	137	93.06
41688	XP_019038282.1	84.507	71	11	0	213	1	344	414	5.28e-34	134	94.37
41688	XP_001383142.1	80.556	72	14	0	216	1	337	408	1.23e-33	133	91.67
41688	XP_015468132.1	80.556	72	14	0	216	1	349	420	1.43e-33	133	90.28
41688	XP_020076097.1	80.556	72	14	0	216	1	344	415	2.22e-33	132	90.28
41688	XP_456766.1	80.556	72	14	0	216	1	347	418	3.54e-33	132	90.28
41688	XP_011276068.1	83.099	71	12	0	213	1	373	443	5.23e-33	132	91.55
41688	XP_020064353.1	77.778	72	16	0	216	1	326	397	1.43e-32	130	90.28
41688	XP_018172250.2	77.465	71	16	0	213	1	330	400	2.12e-32	130	91.55
41688	XP_716609.1	77.778	72	16	0	216	1	393	464	2.67e-32	130	90.28
41688	XP_002615883.1	77.465	71	16	0	213	1	282	352	3.33e-32	128	90.14
41688	XP_002548151.1	75	72	18	0	216	1	357	428	6.73e-32	129	90.28
41688	XP_018710176.1	75	72	18	0	216	1	263	334	8.57e-32	127	90.28
41688	XP_002419485.1	76.389	72	17	0	216	1	380	451	9.85e-32	129	90.28
41688	XP_003868484.1	77.465	71	16	0	213	1	321	391	1.16e-31	127	88.73
41688	XP_022457008.1	78.571	70	15	0	210	1	305	374	3.97e-31	126	91.43
41688	XP_007376452.1	76.389	72	17	0	216	1	344	415	8.19e-31	126	87.5
41688	XP_006689317.1	72.222	72	20	0	216	1	367	438	2.6e-30	124	88.89
41688	XP_020072866.1	72.222	72	20	0	216	1	353	424	6.97e-30	124	87.5
41688	XP_020047380.1	75.342	73	15	1	219	1	308	377	8.52e-30	122	87.67
41688	XP_001526223.1	71.831	71	20	0	213	1	486	556	2.12e-29	123	90.14
41688	XP_001486325.1	75.362	69	17	0	207	1	293	361	1.05e-28	119	89.86
41688	XP_020544406.1	69.333	75	21	1	219	1	343	417	2.98e-26	113	82.67
41688	XP_019016200.1	67.123	73	24	0	219	1	256	328	4.12e-26	112	83.56
41688	XP_001551975.1	56.944	72	31	0	216	1	47	118	1.14e-21	98.2	75
41688	XP_007294905.1	58.333	72	30	0	216	1	286	357	1.34e-21	100	79.17
41688	XP_018133652.1	56.944	72	31	0	216	1	291	362	4.7e-21	99.8	77.78
41688	XP_003175819.1	58.333	72	30	0	216	1	300	371	6.72e-21	99.4	76.39
41688	XP_008079626.1	56.944	72	31	0	216	1	290	361	7.38e-21	99	77.78
41688	XP_003234581.1	58.333	72	30	0	216	1	301	372	7.44e-21	99	76.39
41688	XP_002848231.1	58.333	72	30	0	216	1	301	372	8.2e-21	99	76.39
41688	XP_001239402.2	56.944	72	31	0	216	1	291	362	8.27e-21	98.6	76.39
41688	XP_003067021.1	56.944	72	31	0	216	1	289	360	8.47e-21	98.6	76.39
41688	XP_003682814.1	54.795	73	33	0	219	1	273	345	9.07e-21	98.2	75.34
41688	XP_011117466.1	59.701	67	27	0	201	1	280	346	1.05e-20	98.6	82.09
41688	XP_003018929.1	58.333	72	30	0	216	1	337	408	1.09e-20	98.6	76.39
41688	XP_003010422.1	58.333	72	30	0	216	1	335	406	1.1e-20	98.6	76.39
41688	XP_002494475.1	56.164	73	32	0	219	1	292	364	1.11e-20	97.8	76.71
41688	XP_018076335.1	55.556	72	32	0	216	1	291	362	1.24e-20	98.2	76.39
41688	XP_002841131.1	55.556	72	32	0	216	1	283	354	1.4e-20	98.2	76.39
41688	XP_007802686.1	56.944	72	31	0	216	1	292	363	1.42e-20	98.2	76.39
41688	NP_014382.1	54.795	73	33	0	219	1	321	393	1.47e-20	97.8	73.97
41688	XP_001595250.1	56.944	72	31	0	216	1	286	357	1.55e-20	98.2	75
41688	XP_454345.1	53.425	73	34	0	219	1	339	411	1.75e-20	97.8	75.34
41688	XP_016225050.1	55.556	72	32	0	216	1	287	358	1.91e-20	97.1	76.39
41688	XP_018219859.1	54.795	73	33	0	219	1	337	409	2.02e-20	97.8	73.97
41688	XP_015701875.1	59.701	67	27	0	201	1	302	368	2.73e-20	97.4	79.1
41688	XP_007910860.1	55.556	72	32	0	216	1	287	358	3.12e-20	97.1	75
41688	XP_010757900.1	59.701	67	27	0	201	1	286	352	3.22e-20	97.1	79.1
41688	XP_016225049.1	55.556	72	32	0	216	1	287	358	3.62e-20	97.1	76.39
41688	XP_001908468.1	54.167	72	33	0	216	1	285	356	6.15e-20	96.3	75
41688	XP_018192300.1	54.167	72	33	0	216	1	290	361	6.29e-20	96.3	75
41688	XP_022678166.1	53.425	73	34	0	219	1	332	404	7.55e-20	95.9	73.97
41688	XP_013344093.1	56.944	72	31	0	216	1	268	339	7.67e-20	95.9	72.22
41688	XP_013431484.1	56.944	72	31	0	216	1	245	316	8.37e-20	95.1	72.22
41688	XP_018736448.1	60.606	66	26	0	198	1	249	314	8.9e-20	94.7	81.82
41688	XP_002555507.1	53.425	73	34	0	219	1	301	373	9.59e-20	95.5	73.97
41688	XP_022498524.1	59.701	67	27	0	201	1	286	352	1.18e-19	95.5	79.1
41688	XP_003655926.1	56.716	67	29	0	201	1	292	358	1.23e-19	95.5	79.1
41688	XP_001210484.1	54.167	72	33	0	216	1	291	362	1.25e-19	95.5	75
41688	XP_022584334.1	54.167	72	33	0	216	1	291	362	1.48e-19	95.1	75
41688	XP_015404742.1	54.167	72	33	0	216	1	290	361	1.65e-19	95.1	75
41688	XP_017987503.1	55.714	70	31	0	210	1	284	353	1.68e-19	94.7	75.71
41688	XP_022390557.1	54.167	72	33	0	216	1	290	361	1.72e-19	95.1	75
41688	XP_001818882.1	54.167	72	33	0	216	1	290	361	1.72e-19	95.1	75
41688	XP_007761071.1	58.209	67	28	0	201	1	286	352	1.81e-19	95.1	79.1
41688	XP_013290149.1	58.209	67	28	0	201	1	286	352	1.88e-19	95.1	79.1
41688	XP_016241384.1	58.209	67	28	0	201	1	285	351	1.91e-19	95.1	79.1
41688	XP_016259569.1	58.209	67	28	0	201	1	284	350	2.07e-19	94.7	79.1
41688	XP_008730402.1	58.209	67	28	0	201	1	286	352	2.24e-19	94.7	79.1
41688	XP_017995440.1	56.716	67	29	0	201	1	285	351	2.47e-19	94.7	77.61
41688	XP_006697386.1	56.716	67	29	0	201	1	295	361	2.47e-19	94.7	77.61
41688	XP_962723.2	52.778	72	34	0	216	1	288	359	2.57e-19	94.7	75
41688	XP_014168115.1	57.576	66	28	0	198	1	290	355	2.6e-19	94.7	80.3
41688	XP_009850555.1	52.778	72	34	0	216	1	302	373	2.73e-19	94.7	75
41688	XP_016638237.1	56.716	67	29	0	201	1	285	351	2.97e-19	94.4	79.1
41688	XP_003350434.1	55.224	67	30	0	201	1	308	374	3.02e-19	94.4	79.1
41688	XP_016583978.1	57.576	66	28	0	198	1	285	350	3.05e-19	94	80.3
41688	XP_018696096.1	56.716	67	29	0	201	1	285	351	3.05e-19	94.4	79.1
41688	XP_003684938.1	55.556	72	32	0	216	1	306	377	3.05e-19	94.4	77.78
41688	XP_011323952.1	59.091	66	27	0	198	1	287	352	3.1e-19	94.4	80.3
41688	XP_020056556.1	54.167	72	33	0	216	1	291	362	3.11e-19	94.4	73.61
41688	XP_007750270.1	56.716	67	29	0	201	1	286	352	3.23e-19	94.4	79.1
41688	XP_016617672.1	56.716	67	29	0	201	1	290	356	3.24e-19	94.4	79.1
41688	XP_013324762.1	54.167	72	33	0	216	1	283	354	3.29e-19	94.4	73.61
41688	XP_009259050.1	59.091	66	27	0	198	1	296	361	3.68e-19	94.4	80.3
41688	XP_007922558.1	54.167	72	33	0	216	1	280	351	4.11e-19	94	72.22
41688	XP_003662644.1	52.778	72	34	0	216	1	287	358	4.53e-19	94	73.61
41688	XP_013256032.1	56.716	67	29	0	201	1	287	353	5.02e-19	93.6	77.61
41688	XP_018702689.1	57.576	66	28	0	198	1	273	338	5.14e-19	93.6	80.3
41688	XP_013320689.1	56.716	67	29	0	201	1	302	368	5.45e-19	93.6	79.1
41688	XP_016764051.1	52.778	72	34	0	216	1	280	351	5.71e-19	93.6	75
41688	XP_013320688.1	56.716	67	29	0	201	1	286	352	5.81e-19	93.6	79.1
41688	XP_007819782.1	59.091	66	27	0	198	1	283	348	6.6e-19	93.6	78.79
41688	XP_014542310.1	59.091	66	27	0	198	1	283	348	6.67e-19	93.2	78.79
41688	XP_007733260.1	56.716	67	29	0	201	1	282	348	6.97e-19	93.2	77.61
41688	XP_016253598.1	55.224	67	30	0	201	1	286	352	7e-19	93.2	79.1
41688	XP_020130593.1	52.778	72	34	0	216	1	287	358	7.12e-19	93.2	75
41688	XP_001645702.1	55.556	72	32	0	216	1	305	376	7.23e-19	93.2	75
41688	XP_016253597.1	55.224	67	30	0	201	1	286	352	7.3e-19	93.2	79.1
41692	XP_019039789.1	59.873	157	51	5	98	550	230	380	6.62e-41	155	71.34
41692	XP_020069018.1	54.777	157	49	3	113	550	253	398	9.54e-39	149	64.97
41692	XP_011277302.1	49.405	168	57	5	104	544	268	428	2.37e-29	124	62.5
41692	XP_002617271.1	41.06	151	66	4	104	547	240	370	7.52e-20	96.7	54.97
41692	XP_006684079.1	40.26	154	48	6	110	538	250	370	6.2e-18	91.3	50
41692	XP_006684078.1	40.26	154	48	6	110	538	116	236	6.67e-18	90.9	50
41692	XP_015467576.1	39.31	145	59	4	110	508	251	378	1.36e-17	90.1	52.41
41692	XP_457629.2	40	145	59	4	110	508	251	379	1.98e-17	89.7	53.79
41692	XP_002549824.1	38.125	160	76	4	104	532	294	447	5.19e-17	88.6	56.25
41692	XP_002417694.1	40.506	158	56	6	107	532	264	399	5.4e-17	88.6	52.53
41692	XP_003866661.1	38.608	158	58	6	110	508	331	474	8.45e-17	87.8	51.27
41692	XP_001484587.1	36.129	155	64	6	98	535	197	325	1.22e-16	87.4	52.26
41692	XP_018710505.1	42.069	145	50	7	107	526	263	378	2.43e-16	86.7	54.48
41692	XP_713814.1	39.241	158	57	6	107	532	267	401	6.01e-16	85.5	52.53
41692	XP_007372662.1	39.86	143	62	5	110	508	263	391	1.97e-15	84	54.55
41692	XP_020066454.1	35	160	64	5	98	526	225	361	3.67e-15	83.2	49.38
41692	XP_001387398.2	36	150	61	4	107	508	242	372	7.14e-15	82.4	48.67
41692	XP_001528276.1	35.669	157	65	6	107	508	414	557	9.73e-15	82	50.96
41692	XP_020078284.1	38.065	155	60	5	101	508	273	410	1.19e-14	81.6	52.26
41692	XP_018169236.2	36.913	149	66	6	98	508	314	446	1.18e-13	79	54.36
41692	XP_022458469.1	34.899	149	55	5	113	508	135	258	9.55e-13	75.9	46.31
41692	XP_002489509.1	34.307	137	79	3	113	508	182	312	1.34e-11	72.8	51.82
41692	XP_018982874.1	34.586	133	48	5	113	505	243	338	1.81e-10	69.7	48.87
41692	XP_018211137.1	32.836	134	65	4	116	502	201	314	2.26e-10	69.3	47.76
41692	XP_013934726.1	32.824	131	69	4	116	502	147	260	1.87e-09	66.2	46.56
41692	XP_020047411.1	28.788	198	85	5	101	529	365	561	7.49e-08	62	41.41
41706	XP_023943893.1	55	140	63	0	458	39	244	383	3.81e-46	165	74.29
41706	XP_014355507.1	45.517	145	73	3	461	39	70	212	1.11e-30	120	57.93
41706	XP_013189074.1	43.046	151	73	2	455	42	342	492	1.54e-30	126	57.62
41706	XP_022825805.1	42.361	144	83	0	470	39	735	878	1.97e-29	124	64.58
41706	XP_022920551.1	44.056	143	76	1	470	42	487	625	2.36e-29	124	58.04
41706	XP_022906140.1	44.056	143	76	1	470	42	487	625	2.38e-29	124	58.04
41706	XP_022207389.1	39.86	143	83	2	470	42	106	245	3.88e-28	115	58.74
41706	XP_014480095.1	40	150	76	3	452	42	522	670	6.43e-24	108	55.33
41706	XP_012522540.1	36.429	140	83	3	452	42	540	676	1.41e-19	96.3	57.14
41706	XP_012522541.1	36.429	140	83	3	452	42	426	562	1.64e-19	95.9	57.14
41706	XP_022911983.1	37.589	141	73	3	452	42	457	586	2.69e-19	95.5	52.48
41706	XP_022828475.1	46.392	97	52	0	329	39	125	221	1.2e-18	89.7	63.92
41706	XP_022910249.1	36.429	140	79	3	461	42	468	597	1.41e-18	93.2	52.86
41706	XP_022913435.1	35.484	155	91	4	470	12	435	582	1.6e-18	93.2	52.9
41706	XP_017304601.1	37.226	137	79	3	446	39	391	521	2.74e-18	92.4	55.47
41706	XP_014292600.1	34.463	177	74	5	470	66	304	480	2.83e-18	92	48.59
41706	XP_011867063.1	33.577	137	83	2	452	42	480	608	2.86e-17	89.4	52.55
41706	XP_014279549.1	32.867	143	86	2	452	39	444	581	4.5e-17	89	51.75
41706	XP_023231661.1	34.266	143	92	1	470	42	437	577	7.61e-17	88.2	52.45
41706	XP_021101100.1	33.824	136	84	2	446	39	1295	1424	1.01e-16	88.2	51.47
41706	XP_022910938.1	36.129	155	83	5	467	18	433	576	1.96e-16	87	52.26
41706	XP_014299917.1	31.25	144	94	2	467	42	36	176	1.99e-16	83.2	50
41706	XP_004559878.1	31.757	148	90	4	461	42	532	676	4.37e-16	86.3	52.7
41706	XP_004559879.1	31.757	148	90	4	461	42	520	664	4.56e-16	85.9	52.7
41706	XP_022244712.1	32.168	143	88	2	470	42	615	748	5e-16	85.9	51.75
41706	XP_015120066.1	34.722	144	81	3	467	42	454	586	5.17e-16	85.9	50
41706	XP_023239706.1	35.374	147	87	3	470	39	429	570	5.38e-16	85.9	52.38
41706	XP_022200342.1	31.915	141	92	2	461	42	191	328	5.83e-16	84.7	55.32
41706	XP_011858775.1	35.211	142	75	3	452	42	421	550	7.29e-16	85.5	51.41
41706	XP_013183995.1	34.752	141	85	2	461	39	433	566	1.26e-15	84.7	52.48
41706	XP_011860626.1	35.714	140	79	3	452	39	455	585	1.61e-15	84.3	52.14
41706	XP_018374167.1	34.307	137	84	3	452	42	433	563	2.1e-15	84	57.66
41706	XP_013198532.1	31.884	138	90	1	452	39	487	620	2.32e-15	84	52.9
41706	XP_011171617.1	37.324	142	76	4	461	42	440	570	2.44e-15	84	50.7
41706	XP_015609931.1	30.508	177	95	5	548	42	414	570	3.79e-15	83.2	51.98
41706	XP_022192012.1	34.375	128	79	1	470	87	502	624	7.46e-15	82.4	53.12
41706	XP_022908427.1	34.028	144	90	3	470	39	155	293	9.69e-15	80.5	50.69
41706	XP_017779488.1	35	140	87	2	461	42	451	586	1.18e-14	82	53.57
41706	XP_022828398.1	31.469	143	89	2	470	42	98	231	1.38e-14	79.3	51.75
41706	XP_022910826.1	35.556	135	79	4	467	75	433	563	1.47e-14	81.6	53.33
41706	XP_023565842.1	34.783	138	83	3	446	33	450	580	2.27e-14	81.3	51.45
41706	XP_022834942.1	32.117	137	85	3	452	42	442	570	2.29e-14	81.3	49.64
41706	XP_015121722.1	30.573	157	99	4	482	12	362	508	2.5e-14	80.9	54.14
41706	XP_020289688.1	31.387	137	89	2	452	42	363	494	3.85e-14	80.5	56.2
41706	XP_021191520.1	41.221	131	67	4	428	42	452	574	3.92e-14	80.5	52.67
41706	XP_015121474.1	32.895	152	85	6	485	39	370	507	4.22e-14	80.1	52.63
41706	XP_020289691.1	30.405	148	96	3	452	9	347	487	4.48e-14	80.1	54.73
41706	XP_022910889.1	29.655	145	97	3	470	39	438	578	4.7e-14	80.1	53.1
41706	XP_022827509.1	34.932	146	77	4	467	42	322	453	5.34e-14	79.7	48.63
41706	XP_022181516.1	32.394	142	87	3	467	42	420	552	5.43e-14	80.1	52.11
41706	XP_022901965.1	31.507	146	94	3	470	39	183	324	8.35e-14	78.6	50
41706	XP_022910490.1	33.333	141	89	3	461	39	300	435	1.12e-13	79	50.35
41706	XP_008178600.1	31.69	142	88	3	467	42	241	373	1.25e-13	78.6	51.41
41706	XP_022202874.1	34.722	144	83	5	461	42	457	593	1.4e-13	79	54.86
41706	XP_011864172.1	32.857	140	86	3	452	42	439	573	1.41e-13	79	56.43
41706	XP_022204262.1	34.722	144	83	5	461	42	531	667	1.47e-13	79	54.86
41706	XP_011603527.1	30.573	157	95	4	479	42	469	622	1.58e-13	78.6	49.04
41706	XP_022810107.1	28.571	147	100	3	467	39	480	625	1.74e-13	78.6	48.98
41706	XP_022802223.1	28.571	147	100	3	467	39	480	625	1.74e-13	78.6	48.98
41706	XP_011163146.1	30.058	173	104	6	548	42	784	943	1.89e-13	78.6	51.45
41706	XP_022199000.1	28.655	171	107	6	545	42	158	316	2.13e-13	77.4	50.29
41706	XP_017300008.1	30.57	193	114	6	611	39	293	467	2.25e-13	78.2	49.22
41706	XP_015376737.1	29.655	145	90	3	461	39	278	414	2.51e-13	77.8	51.72
41706	XP_023228246.1	30.137	146	96	4	470	39	438	579	2.8e-13	77.8	54.79
41706	XP_017781814.1	35.461	141	83	4	461	42	258	391	3.49e-13	77.4	51.06
41706	XP_022542122.1	30.263	152	99	4	479	39	419	568	3.57e-13	77.8	48.68
41706	XP_018941089.1	32.192	146	87	5	479	42	85	218	3.64e-13	75.1	50
41706	XP_011874410.1	32.593	135	81	2	446	42	193	317	3.99e-13	76.6	49.63
41706	XP_013006050.1	32.353	136	87	2	446	39	252	382	4.02e-13	77	50
41706	XP_018799787.1	35.526	152	82	8	470	54	3	151	4.05e-13	73.6	51.97
41706	XP_023214738.1	29.655	145	96	4	467	39	81	221	4.73e-13	75.1	52.41
41706	XP_013360840.1	33.088	136	85	2	446	39	454	583	4.94e-13	77	48.53
41706	XP_022164007.1	33.094	139	80	3	467	66	444	574	6.12e-13	77	51.08
41706	XP_022169844.1	33.094	139	80	3	467	66	443	573	6.17e-13	77	51.08
41706	XP_022823959.1	33.088	136	88	2	449	42	474	606	6.52e-13	77	52.21
41706	XP_015753464.1	27.891	147	101	3	467	39	146	291	7.68e-13	75.5	48.3
41706	XP_011158229.1	32.867	143	87	2	452	42	443	582	8.51e-13	76.6	49.65
41706	XP_023015713.1	30.07	143	92	2	470	42	335	469	9.63e-13	76.3	49.65
41706	XP_020483419.1	29.747	158	106	4	485	21	426	581	1.07e-12	76.3	52.53
41706	XP_023184827.1	26.573	143	99	4	452	42	59	201	1.18e-12	73.6	53.15
41706	XP_006809984.1	40	90	54	0	461	192	3	92	1.18e-12	76.3	58.89
41706	XP_023207869.1	28	150	99	3	479	42	434	578	1.19e-12	76.3	50.67
41706	XP_014853421.1	28	150	99	3	479	42	432	576	1.44e-12	75.9	50
41706	XP_016655893.1	32.593	135	81	2	470	66	193	317	1.57e-12	75.1	49.63
41706	XP_008423828.1	29.333	150	97	3	479	42	432	576	1.63e-12	75.9	50.67
41706	XP_023183641.1	26.573	143	99	4	452	42	78	220	1.91e-12	73.2	53.15
41706	XP_005997448.1	28.667	150	97	3	479	42	443	586	1.97e-12	75.5	48.67
41706	XP_023213628.1	30.435	138	93	2	452	39	450	584	2.06e-12	75.5	50
41706	XP_016656685.1	32.593	135	81	2	470	66	437	561	2.08e-12	75.5	49.63
41706	XP_016658230.1	28.966	145	91	3	461	39	359	495	2.28e-12	75.1	51.72
41706	XP_004927171.2	34.507	142	79	3	461	42	292	421	2.53e-12	75.1	49.3
41706	XP_014889000.1	28	150	99	3	479	42	432	576	2.61e-12	75.1	50
41706	XP_023666669.1	29.143	175	86	5	470	42	400	568	2.64e-12	75.1	43.43
41706	XP_021004639.1	29.787	141	92	3	461	42	211	345	3.17e-12	74.3	48.94
41706	XP_022205462.1	26.946	167	92	5	461	39	36	198	3.44e-12	72	47.31
41706	XP_023815209.1	30	150	96	3	479	42	432	576	3.47e-12	74.7	51.33
41706	XP_008188582.2	27.536	138	90	2	452	39	9	136	3.93e-12	70.5	48.55
41706	XP_005997470.2	28.966	145	97	3	470	42	446	586	4.96e-12	74.3	49.66
41706	XP_019219113.1	27.027	148	101	3	479	39	378	519	6.04e-12	73.9	53.38
41706	XP_018791504.1	36.17	141	85	4	461	42	219	355	6.31e-12	73.6	53.19
41714	XP_001980430.2	92.5	40	3	0	120	1	221	260	8.98e-13	76.6	92.5
41718	NP_009708.1	100	62	0	0	303	118	1033	1094	1.96e-32	134	100
41718	NP_009708.1	100	37	0	0	654	544	897	933	8.15e-15	82.8	100
41718	XP_018223183.1	59.677	62	25	0	303	118	1003	1064	2.76e-05	55.1	74.19
41720	NP_009326.1	97.778	90	2	0	660	391	162	251	9.93e-55	184	98.89
41720	YP_009298333.1	97.778	90	2	0	660	391	162	251	1.14e-54	184	98.89
41720	YP_009310814.1	97.778	90	2	0	660	391	162	251	1.67e-54	183	98.89
41720	YP_009298326.1	96.667	90	3	0	660	391	162	251	2.24e-54	183	98.89
41720	XP_022467373.1	97.778	90	2	0	660	391	162	251	3.57e-54	182	97.78
41720	YP_002640601.1	97.778	90	2	0	660	391	162	251	4.79e-54	182	97.78
41720	YP_009144712.1	96.667	90	3	0	660	391	162	251	5.57e-54	182	97.78
41720	YP_009310800.1	96.667	90	3	0	660	391	162	251	5.88e-54	182	97.78
41720	YP_009310840.1	95.556	90	4	0	660	391	162	251	9.91e-54	181	97.78
41720	YP_009454584.1	94.444	90	5	0	660	391	160	249	2.01e-52	178	95.56
41720	NP_861464.1	93.333	90	6	0	660	391	161	250	2.38e-52	178	96.67
41720	YP_009444496.1	93.333	90	6	0	660	391	156	245	2.4e-52	177	96.67
41720	YP_002836211.1	93.333	90	6	0	660	391	158	247	2.51e-52	177	95.56
41720	YP_006460459.1	92.222	90	7	0	660	391	162	251	8.06e-51	174	94.44
41720	YP_009444486.1	92.222	90	7	0	660	391	160	249	2.17e-50	173	93.33
41720	YP_184727.1	91.111	90	8	0	660	391	162	251	5.85e-50	172	93.33
41720	YP_009444515.1	91.111	90	8	0	660	391	160	249	8.8e-50	171	92.22
41720	YP_009444511.1	91.111	90	8	0	660	391	161	250	1.05e-49	171	92.22
41720	YP_009444464.1	90	90	9	0	660	391	161	250	2.56e-49	170	92.22
41720	YP_009155514.1	90	90	9	0	660	391	161	250	5.71e-49	169	92.22
41720	NP_009327.1	92	100	8	0	301	2	36	135	1.56e-48	174	98
41720	YP_001331017.1	87.778	90	11	0	660	391	167	256	3.51e-48	167	92.22
41720	YP_054502.1	86.667	90	12	0	660	391	167	256	4.31e-48	167	92.22
41720	YP_009155497.1	86.667	90	12	0	660	391	158	247	4.72e-48	167	91.11
41720	YP_009093757.1	86.667	90	12	0	660	391	158	247	5.61e-48	166	93.33
41720	YP_002836207.1	86.667	90	12	0	660	391	158	247	7.68e-48	166	92.22
41720	NP_644686.1	87.778	90	11	0	660	391	160	249	8.31e-48	166	91.11
41720	YP_009154752.1	86.667	90	12	0	660	391	158	247	1.12e-47	166	90
41720	YP_009444446.1	86.667	90	12	0	660	391	161	250	2.26e-47	165	90
41720	YP_009444432.1	84.444	90	14	0	660	391	153	242	2.03e-46	162	91.11
41720	YP_009235517.1	81.111	90	17	0	660	391	158	247	2.64e-44	157	88.89
41720	YP_008475189.1	80	90	18	0	660	391	158	247	2.73e-44	157	90
41720	NP_987078.1	77.778	90	20	0	660	391	159	248	5.14e-44	156	86.67
41720	YP_005097964.1	77.778	90	20	0	660	391	159	248	5.85e-44	156	86.67
41720	YP_008475064.1	82.222	90	16	0	660	391	158	247	6.27e-44	156	88.89
41720	YP_008474807.1	78.889	90	19	0	660	391	159	248	7.34e-44	156	88.89
41720	YP_008475096.1	78.889	90	19	0	660	391	158	247	9.05e-44	155	90
41720	YP_008475041.1	81.111	90	17	0	660	391	158	247	9.97e-44	155	88.89
41720	NP_038222.1	80	90	18	0	660	391	158	247	1.03e-43	155	90
41720	YP_008475106.1	81.111	90	17	0	660	391	158	247	1.42e-43	155	88.89
41720	YP_004072411.1	77.778	90	20	0	660	391	159	248	2.51e-43	154	88.89
41720	YP_009029720.1	74.444	90	23	0	660	391	159	248	1.5e-42	152	86.67
41720	YP_008474968.1	77.778	90	20	0	660	391	162	251	2.1e-42	152	87.78
41720	YP_009029657.1	76.667	90	21	0	660	391	160	249	2.26e-42	152	84.44
41720	YP_008475290.1	77.778	90	20	0	660	391	157	246	2.47e-42	152	87.78
41720	YP_007317640.2	75.556	90	22	0	660	391	158	247	3.16e-42	152	85.56
41720	YP_006460229.1	80	100	18	1	301	2	42	139	3.52e-42	157	91
41720	YP_003127080.1	77.778	90	20	0	660	391	156	245	1.59e-41	150	87.78
41720	YP_008475092.1	75.556	90	22	0	660	391	157	246	2.28e-41	149	86.67
41720	YP_008475030.1	80.899	89	17	0	660	394	151	239	4.65e-41	149	85.39
41720	YP_008475155.1	79.775	89	18	0	660	394	151	239	6.71e-41	148	86.52
41720	YP_008474941.1	75.556	90	22	0	660	391	155	244	8.06e-41	148	86.67
41720	YP_008474878.1	75.556	90	22	0	660	391	151	240	1.05e-40	147	86.67
41720	YP_227571.1	79.775	89	18	0	660	394	173	261	1.1e-40	148	86.52
41720	NP_943635.1	79.775	89	18	0	660	394	173	261	1.14e-40	148	86.52
41720	YP_227556.1	79.775	89	18	0	660	394	173	261	1.19e-40	148	86.52
41720	YP_004362949.1	73.333	90	24	0	660	391	160	249	1.63e-40	147	87.78
41720	YP_009110267.1	70	90	27	0	660	391	158	247	2.65e-40	147	85.56
41720	YP_008475253.1	78.652	89	19	0	660	394	151	239	4.06e-40	146	84.27
41720	NP_075030.2	76.667	90	21	0	660	391	151	240	5.02e-40	147	83.33
41720	XP_020073654.1	78.824	85	18	0	660	406	11	95	8.92e-40	140	85.88
41720	YP_008474891.1	67.778	90	29	0	660	391	157	246	9.02e-40	145	87.78
41720	YP_003127032.1	72.222	90	25	0	660	391	158	247	1.11e-39	145	85.56
41720	YP_003434122.1	74.444	90	23	0	660	391	151	240	1.68e-39	145	83.33
41720	YP_008475226.1	75.556	90	22	0	660	391	151	240	2e-39	144	83.33
41720	YP_008475302.1	75.556	90	22	0	660	391	151	240	2.07e-39	145	83.33
41720	YP_003204918.1	72.222	90	25	0	660	391	151	240	2.87e-39	144	84.44
41720	YP_008475271.1	77.778	90	20	0	660	391	151	240	2.96e-39	144	82.22
41720	YP_003795197.1	78.824	85	18	0	660	406	155	239	3.56e-39	144	85.88
41720	YP_008475136.1	78.652	89	19	0	660	394	151	239	4.07e-39	144	83.15
41720	YP_008578719.1	71.111	90	26	0	660	391	154	243	4.59e-39	144	83.33
41720	YP_008475004.1	75	88	22	0	660	397	151	238	5.42e-39	143	85.23
41720	YP_003434269.1	75.556	90	22	0	660	391	151	240	6.51e-39	143	83.33
41720	YP_008474859.1	75.556	90	22	0	660	391	151	240	6.7e-39	144	83.33
41720	YP_008475168.1	78.824	85	18	0	660	406	151	235	7.05e-39	143	85.88
41720	YP_004733511.1	78.824	85	18	0	660	406	151	235	7.13e-39	143	85.88
41720	YP_003935009.1	74.444	90	23	0	660	391	154	243	7.56e-39	143	84.44
41720	YP_008474989.1	76.667	90	21	0	660	391	151	240	8.37e-39	144	83.33
41720	XP_018982245.1	70.238	84	25	0	660	409	24	107	1.13e-38	138	86.9
41720	YP_002122383.1	77.647	85	19	0	660	406	151	235	1.37e-38	142	85.88
41720	YP_003935024.1	68.889	90	28	0	660	391	157	246	2.42e-38	142	83.33
41720	YP_003433751.1	74.444	90	23	0	660	391	151	240	2.57e-38	142	83.33
41720	YP_008474829.1	74.444	90	23	0	660	391	151	240	2.59e-38	142	83.33
41720	YP_004927959.1	70	90	27	0	660	391	153	242	2.96e-38	141	84.44
41720	YP_009029696.1	70	90	27	0	660	391	158	247	3.03e-38	141	78.89
41720	NP_075438.2	71.111	90	26	0	660	391	153	242	4.5e-38	141	84.44
41720	YP_008474928.1	73.333	90	24	0	660	391	151	240	4.85e-38	141	82.22
41720	YP_004927425.1	68.889	90	28	0	660	391	153	242	5.12e-38	141	84.44
41720	YP_004927807.1	70	90	27	0	660	391	153	242	5.28e-38	140	84.44
41720	XP_015464324.1	75.294	85	21	0	660	406	11	95	6.47e-38	135	83.53
41720	YP_009445627.1	72.222	90	25	0	660	391	163	252	7.45e-38	140	80
41720	YP_052724.2	67.778	90	29	0	660	391	157	246	7.69e-38	140	81.11
41720	XP_015464336.1	75.294	85	21	0	660	406	39	123	1.03e-37	136	83.53
41720	YP_008578702.1	69.663	89	27	0	660	394	151	239	1.05e-37	140	84.27
41720	YP_004927902.1	68.889	90	28	0	660	391	153	242	1.29e-37	140	84.44
41720	YP_007475008.1	66.667	90	30	0	660	391	156	245	1.79e-37	139	85.56
41720	YP_008081990.1	68.889	90	28	0	660	391	162	251	2.58e-37	139	81.11
41720	YP_009437705.1	70	90	27	0	660	391	151	240	3.18e-37	139	83.33
41720	YP_007475435.1	68.889	90	28	0	660	391	169	258	3.79e-37	139	81.11
41720	YP_009326089.1	77.632	76	17	0	660	433	11	86	6.4e-37	134	89.47
41724	XP_018785819.1	52.727	220	103	1	661	2	83	301	4.78e-66	218	75.45
41724	XP_017470380.1	44.344	221	115	4	646	5	55	274	8.68e-45	163	66.06
41724	XP_011313385.1	45.411	207	105	4	643	41	150	354	8.09e-44	159	65.22
41724	XP_012271144.2	39.648	227	126	5	652	2	950	1175	2.35e-43	165	63.88
41724	XP_017468483.1	40.183	219	121	5	637	5	133	349	3.98e-43	164	68.49
41724	XP_017475278.1	40.639	219	120	5	637	5	242	458	4.11e-43	164	68.95
41724	XP_011858993.1	45.933	209	106	4	649	41	40	247	7.06e-43	158	65.07
41724	XP_011883720.1	39.912	228	129	5	664	2	865	1091	1.68e-42	162	64.04
41724	XP_011877288.1	41.784	213	115	6	619	2	138	348	2.06e-42	155	64.79
41724	XP_011867587.1	39.912	228	129	5	664	2	51	277	5.52e-42	160	64.04
41724	XP_023228360.1	42.793	222	118	5	643	2	216	436	5.9e-42	161	64.41
41724	XP_023248115.1	43.636	220	120	4	655	5	943	1161	6.14e-42	161	62.73
41724	XP_023247997.1	43.636	220	120	4	655	5	943	1161	7.35e-42	161	62.73
41724	XP_011858260.1	39.367	221	126	4	643	2	348	567	1.03e-41	160	64.71
41724	XP_011859045.1	42.534	221	116	5	640	2	616	833	1.17e-41	160	61.99
41724	XP_011858561.1	40.351	228	128	5	664	2	212	438	1.18e-41	155	63.16
41724	XP_014216735.1	40.455	220	127	4	652	2	128	346	1.38e-41	159	63.64
41724	XP_021186724.1	43.636	220	113	6	637	5	556	773	1.51e-41	160	66.36
41724	XP_011884102.1	42.254	213	114	6	619	2	138	348	1.71e-41	155	65.26
41724	XP_011859874.1	39.912	228	129	5	664	2	864	1090	1.73e-41	160	63.6
41724	XP_011883935.1	39.474	228	130	5	664	2	878	1104	1.94e-41	160	63.6
41724	XP_015115252.1	40.541	222	123	5	646	2	135	354	1.98e-41	154	66.22
41724	XP_011858796.1	39.474	228	130	5	664	2	928	1154	2.18e-41	159	63.6
41724	XP_011858274.1	41.981	212	115	6	619	2	710	919	2.18e-41	159	64.62
41724	XP_022906253.1	41.892	222	118	7	640	2	771	990	3.95e-41	159	63.06
41724	XP_011705795.1	42.991	214	113	5	619	2	20	232	4.07e-41	158	65.89
41724	XP_011691716.1	42.991	214	113	5	619	2	140	352	4.25e-41	159	65.89
41724	XP_011858485.1	38.696	230	134	4	673	2	399	627	6.24e-41	158	61.74
41724	XP_014206473.1	42.727	220	122	4	655	5	118	336	8.81e-41	157	62.27
41724	XP_017875322.1	43.379	219	116	4	640	5	103	320	9.75e-41	157	59.82
41724	XP_011870950.1	39.474	228	130	5	664	2	35	261	9.76e-41	157	63.6
41724	XP_011867097.1	39.035	228	131	5	664	2	122	348	1.03e-40	157	63.16
41724	XP_011859248.1	44.811	212	109	4	646	32	158	368	1.15e-40	157	62.26
41724	XP_022835494.1	40.773	233	121	6	667	5	549	776	1.52e-40	157	64.81
41724	XP_014359136.1	43.721	215	112	5	625	5	739	952	1.87e-40	157	65.58
41724	XP_022821325.1	41.071	224	123	5	652	5	573	795	2.39e-40	156	64.73
41724	XP_013161363.1	41.86	215	116	5	625	5	139	352	2.84e-40	151	66.51
41724	XP_022908845.1	41.304	230	126	6	667	2	939	1167	3.28e-40	156	62.61
41724	XP_011883612.1	39.474	228	130	5	664	2	258	484	3.41e-40	156	63.16
41724	XP_022908846.1	41.485	229	125	6	664	2	940	1167	3.65e-40	156	62.88
41724	XP_022910606.1	41.485	229	125	6	664	2	558	785	3.72e-40	156	62.88
41724	XP_011883905.1	39.189	222	126	5	646	2	937	1156	4.69e-40	155	60.81
41724	XP_017478411.1	38.158	228	133	4	664	2	45	271	5.42e-40	150	60.96
41724	XP_014225041.2	42.453	212	115	4	622	5	362	572	6.61e-40	154	64.62
41724	XP_011859306.1	40.094	212	120	4	619	2	916	1126	6.9e-40	155	63.68
41724	XP_022832838.1	42.857	217	113	6	628	5	981	1195	7.54e-40	155	67.28
41724	XP_023248116.1	43.75	208	114	3	655	38	943	1149	7.6e-40	155	62.98
41724	XP_013178804.1	43.396	212	110	5	670	56	224	432	9.19e-40	150	65.09
41724	XP_018406689.1	41.593	226	114	7	643	2	633	852	9.93e-40	155	67.7
41724	XP_011859460.1	40	215	122	4	664	38	338	551	1.15e-39	152	64.19
41724	XP_023316035.1	40.476	210	122	3	628	5	936	1144	1.17e-39	154	60
41724	XP_015125956.1	39.171	217	123	5	646	17	329	543	1.28e-39	154	64.52
41724	XP_011873677.1	38.739	222	127	5	646	2	94	313	1.29e-39	154	60.36
41724	XP_011859047.1	41.315	213	116	6	619	2	108	318	1.41e-39	151	64.32
41724	XP_011858780.1	38.914	221	126	5	643	2	883	1101	1.55e-39	154	63.8
41724	XP_015921413.1	41.048	229	124	5	658	2	19	246	1.6e-39	147	60.7
41724	XP_014366620.1	43.578	218	114	5	637	5	2	217	1.68e-39	154	65.6
41724	XP_020299330.1	42.727	220	116	6	637	2	321	538	1.8e-39	152	63.18
41724	XP_008181657.1	40.889	225	123	5	655	5	129	351	1.81e-39	154	61.33
41724	XP_018324141.1	40.517	232	127	6	670	2	188	417	2.12e-39	153	63.79
41724	XP_012285782.1	39.269	219	125	5	637	2	239	456	2.7e-39	152	61.64
41724	XP_023314828.1	41.553	219	120	4	637	2	370	587	2.73e-39	153	60.73
41724	XP_011883910.1	39.713	209	118	5	625	17	465	671	2.96e-39	153	64.59
41724	XP_017461765.1	40.5	200	113	3	640	56	63	261	2.96e-39	149	64.5
41724	XP_022908092.1	40.87	230	127	6	667	2	544	772	3.04e-39	153	61.3
41724	XP_023313769.1	43.602	211	112	4	619	5	363	572	3.73e-39	153	65.4
41724	XP_011858172.1	41.553	219	119	5	637	2	575	791	3.81e-39	153	63.01
41724	XP_022836959.1	39.565	230	125	5	664	5	215	440	4.14e-39	149	62.61
41724	XP_011553040.1	36.475	244	133	6	670	5	316	559	4.16e-39	153	61.07
41724	XP_022829980.1	40.639	219	121	5	637	5	937	1154	4.18e-39	153	64.38
41724	XP_012525227.1	40.553	217	119	6	628	2	218	432	4.6e-39	149	65.44
41724	XP_023314647.1	40	225	131	4	670	5	182	405	4.85e-39	149	61.33
41724	XP_012234631.1	42.534	221	114	6	652	17	947	1163	5.22e-39	152	62.9
41724	XP_011696421.1	41.126	231	126	5	667	2	676	905	6.06e-39	152	60.61
41724	XP_011858095.1	39.64	222	125	6	646	2	94	313	6.92e-39	152	59.91
41724	XP_011858208.1	39.367	221	126	5	646	5	467	686	8.16e-39	152	62.44
41724	XP_011309529.1	37.838	222	129	5	646	2	1331	1550	8.19e-39	152	66.22
41724	XP_011869966.1	38.158	228	133	5	664	2	345	571	8.51e-39	151	62.28
41724	XP_013173145.1	41.86	215	118	3	628	5	947	1161	1.11e-38	152	65.12
41724	XP_022165421.1	40.889	225	123	6	655	5	931	1153	1.28e-38	152	62.67
41724	XP_014295779.1	39.912	228	128	5	664	2	124	349	1.29e-38	145	60.53
41724	XP_022824802.1	41.739	230	117	6	658	5	258	482	1.31e-38	151	61.3
41724	XP_023293233.1	39.189	222	128	4	652	5	969	1189	1.36e-38	151	60.36
41724	XP_021200011.1	41.284	218	121	3	637	5	451	668	1.36e-38	151	63.76
41724	XP_014296874.1	39.815	216	121	5	625	2	487	701	1.39e-38	151	65.74
41724	XP_014296541.1	39.815	216	121	5	625	2	426	640	1.44e-38	151	65.74
41724	XP_011553033.1	36.694	248	127	7	670	5	316	559	1.49e-38	151	61.29
41724	XP_008188693.1	38.362	232	133	5	673	5	188	418	1.72e-38	147	59.48
41724	XP_014226170.2	38.158	228	132	5	661	2	1007	1233	1.75e-38	151	61.4
41724	XP_022910016.1	42.081	221	119	6	640	2	333	552	1.9e-38	150	64.71
41724	XP_022824611.1	38.961	231	132	5	673	2	843	1071	2.2e-38	151	60.17
41724	XP_023295713.1	47.03	202	100	4	628	38	1069	1268	2.26e-38	151	63.86
41724	XP_015122513.1	38.288	222	127	6	646	2	579	797	2.29e-38	150	63.96
41724	XP_015374509.1	37.333	225	132	3	655	5	206	429	2.3e-38	148	57.33
41724	XP_011884024.1	39.72	214	120	5	637	17	135	346	2.43e-38	144	59.35
41724	XP_011858404.1	39.189	222	127	5	646	2	467	687	3.09e-38	150	62.61
41724	XP_022826406.1	42.466	219	117	5	637	5	133	350	3.14e-38	146	63.01
41724	XP_015906985.1	41.485	229	123	5	658	2	19	246	3.2e-38	149	60.7
41724	XP_011555064.1	40.092	217	119	5	673	56	848	1064	3.66e-38	150	61.75
41724	XP_022823905.1	42.358	229	121	6	664	5	620	846	3.75e-38	150	62.88
41732	XP_017469498.1	43.825	251	133	3	3	731	53	303	2.01e-62	220	65.74
41732	XP_022225821.1	40.873	252	139	4	3	731	139	389	2.61e-59	201	63.89
41732	XP_013195773.1	35.458	251	143	6	30	731	40	288	5.52e-36	144	53.39
41732	XP_012220525.1	34.94	249	142	7	39	731	114	360	1.22e-34	140	55.02
41732	XP_011688730.1	31.429	280	153	6	9	731	132	411	8.05e-33	135	49.29
41732	XP_011863437.1	33.721	258	145	7	21	731	92	344	3.47e-32	133	53.49
41732	XP_011214024.1	35.656	244	144	6	33	725	135	378	1.73e-30	128	53.69
41732	XP_019845336.1	34.211	228	130	6	99	725	7	233	3.25e-30	122	54.82
41732	XP_011685291.1	35.747	221	126	4	21	641	112	330	7.5e-30	123	53.39
41732	XP_011883683.1	32.922	243	136	5	39	686	228	470	8.51e-30	126	51.85
41732	XP_015189549.1	35.217	230	133	6	15	662	125	352	2.4e-29	125	55.65
41732	XP_023023532.1	30.189	265	157	7	21	731	82	346	5.51e-29	124	53.21
41732	XP_023947956.1	33.471	242	153	3	30	731	65	306	6.32e-29	124	50.83
41732	XP_015123892.1	31.97	269	150	7	21	731	236	503	3.48e-28	122	53.16
41732	XP_008548388.2	33.721	258	144	6	39	731	154	411	5.41e-28	122	51.16
41732	XP_023244036.1	30.98	255	156	7	21	731	121	373	2.9e-27	117	52.16
41732	XP_015189414.1	35.371	229	134	5	15	662	89	316	3.48e-27	119	56.33
41732	XP_022836972.1	31.944	216	133	4	27	638	29	242	4.22e-27	115	54.17
41732	XP_017888656.1	33.465	254	140	7	39	731	171	418	5.75e-27	119	51.57
41732	XP_011690949.1	31.868	273	145	10	21	731	76	343	6.43e-27	118	51.28
41732	XP_022901006.1	34.545	275	142	8	21	731	187	461	1.03e-26	118	53.09
41732	XP_012168080.1	29.249	253	155	5	39	731	137	387	1.32e-26	117	50.99
41732	XP_017467408.1	30.078	256	152	6	39	725	8	263	4.65e-26	115	51.95
41732	XP_017484587.1	29.297	256	162	7	9	725	111	364	6.84e-26	115	51.56
41732	XP_019542509.1	28.627	255	156	5	39	725	112	366	2.73e-25	114	48.24
41732	XP_015119050.1	30.903	288	154	8	3	731	170	457	5.49e-25	113	48.96
41732	XP_013146518.1	32.075	212	133	4	30	632	40	251	6.39e-25	110	53.3
41732	XP_011554954.1	30.806	211	134	3	27	623	35	245	1.08e-24	111	49.29
41732	XP_011555949.1	32.836	201	124	4	45	617	56	255	1.23e-24	107	51.74
41732	XP_014299943.1	29.134	254	159	4	33	731	126	379	1.46e-24	112	50.79
41732	XP_023228161.1	27.843	255	164	6	6	710	154	408	1.63e-24	111	48.24
41732	XP_015123889.1	30.83	253	155	4	33	731	153	405	4.01e-24	110	49.41
41732	XP_012241436.1	27.626	257	165	5	24	731	17	273	8.62e-24	106	50.19
41732	XP_011554774.1	31.754	211	126	3	45	623	41	251	1.41e-23	108	49.29
41732	XP_011554775.1	31.754	211	126	3	45	623	41	251	1.44e-23	108	49.29
41732	XP_012232177.1	29.851	268	155	8	21	731	101	366	1.8e-23	108	49.25
41732	XP_019558429.1	28.244	262	157	6	39	731	162	423	3.05e-23	108	50
41732	XP_022166535.1	30.952	210	133	5	39	641	52	258	3.94e-23	107	51.43
41732	XP_011876213.1	30.736	231	125	6	144	731	1	231	4.18e-23	103	50.22
41732	XP_011165409.1	30.769	247	147	5	48	731	222	463	4.93e-23	107	51.42
41732	XP_023211437.1	28.782	271	156	7	6	731	167	429	1.52e-22	105	46.49
41732	XP_023234497.1	30.258	271	152	8	6	731	14	276	1.65e-22	105	46.13
41732	XP_013142234.1	28.829	222	151	3	21	665	22	243	2.93e-22	102	47.3
41732	XP_013142232.1	28.829	222	151	3	21	665	22	243	3.17e-22	102	47.3
41732	XP_013142233.1	28.829	222	151	3	21	665	22	243	5.45e-22	101	47.3
41732	XP_015371826.1	28.295	258	154	6	39	731	50	303	5.9e-22	104	46.51
41732	XP_011699196.1	28.302	265	148	7	33	725	290	546	6.2e-22	104	47.92
41732	XP_014614899.1	28.295	258	161	4	30	731	57	314	1.08e-21	103	47.67
41732	XP_022834722.1	33.155	187	111	4	114	638	2	186	2.12e-21	102	54.55
41732	XP_011171841.1	38.889	144	87	1	30	458	77	220	2.97e-21	98.6	61.81
41732	XP_022837021.1	29.902	204	126	3	45	623	33	230	3.6e-21	99	49.51
41732	XP_017479208.1	32.159	227	136	6	6	632	164	390	8.19e-21	100	47.14
41732	XP_011562930.1	27.897	233	142	5	12	641	30	259	3.01e-20	99.4	47.21
41732	XP_011561551.1	26.471	238	153	4	12	662	30	266	4.14e-20	99	46.64
41732	XP_020292799.1	27.237	257	152	5	39	725	197	446	5.3e-20	98.6	46.69
41732	XP_018366004.1	40.164	122	71	2	9	368	156	277	1.24e-19	94.7	68.85
41732	XP_005181551.2	29.5	200	136	3	39	626	192	390	1.4e-19	96.7	49
41732	XP_023036758.1	25.463	216	146	2	39	641	123	338	5.59e-19	94.4	44.91
41732	XP_002045177.1	51.136	88	43	0	126	389	1	88	1.15e-18	89.7	70.45
41732	XP_018323007.1	29.493	217	133	5	33	623	111	327	1.77e-18	93.6	50.23
41732	XP_011160745.1	31.683	202	112	6	15	608	214	393	1.82e-18	93.6	55.94
41732	XP_017475323.1	27.586	203	141	3	39	635	127	327	7.34e-18	90.9	47.78
41732	XP_017477534.1	27.149	221	142	4	39	656	259	475	1.51e-17	91.3	47.06
41732	XP_019848499.1	25.475	263	151	5	39	728	94	344	4.78e-17	89.7	44.87
41732	XP_011330016.1	34.752	141	85	2	195	596	11	151	5.74e-17	84.7	56.74
41732	XP_016971393.1	25.592	211	144	4	30	641	143	347	6.4e-17	88.6	46.45
41732	XP_017470074.1	22.909	275	147	6	42	731	92	346	6.49e-17	89.7	44
41732	XP_011700852.1	29.208	202	135	2	135	731	211	407	6.53e-17	89.7	49.5
41732	XP_017011595.1	26.364	220	145	4	33	641	136	355	7.19e-17	88.6	45
41732	XP_015837748.1	26.415	265	139	9	30	731	170	409	9.8e-17	89.4	46.42
41732	XP_023304133.1	24.088	274	166	6	9	731	93	357	1.13e-16	89.4	45.99
41732	XP_022904744.1	28.626	262	167	10	3	731	3	263	1.03e-15	86.3	48.47
41732	XP_017475696.1	26.172	256	142	8	21	731	86	313	1.14e-15	86.3	46.09
41732	XP_017151871.1	24.783	230	155	3	39	677	30	258	1.74e-15	83.6	43.48
41732	XP_011550341.1	29.843	191	126	3	27	590	18	203	3.75e-15	84	49.21
41732	XP_014614736.1	26.587	252	161	4	39	722	78	329	5.03e-15	84.3	45.24
41732	XP_018782763.1	26.977	215	142	2	39	638	178	392	1.23e-14	82.4	41.4
41732	XP_018782762.1	26.977	215	142	2	39	638	178	392	1.33e-14	82.4	41.4
41732	XP_017488062.1	27.67	206	141	3	33	635	200	402	2.96e-14	81.6	45.63
41732	XP_011170558.1	32.692	156	88	3	234	650	263	418	3.35e-13	78.6	51.28
41732	XP_017478609.1	28.141	199	125	2	33	626	1	182	6.01e-13	75.9	46.73
41732	XP_023306809.1	25.287	261	160	10	39	728	134	390	1.23e-12	77	49.43
41732	XP_017468846.1	27.273	209	138	3	39	665	136	330	2.14e-12	76.6	43.06
41732	XP_017471156.1	28.079	203	128	2	21	626	245	430	2.27e-12	76.3	45.32
41732	XP_017487435.1	25.957	235	157	6	78	731	139	373	2.28e-12	76.3	46.38
41732	XP_017471155.1	28.079	203	128	2	21	626	245	430	2.33e-12	76.3	45.32
41732	XP_017467208.1	31.176	170	103	6	123	629	172	328	3.33e-12	75.9	54.71
41732	XP_019538544.1	24.675	231	148	7	24	641	66	295	1.12e-11	73.6	44.59
41732	XP_017467456.1	29.032	186	106	5	246	725	2	187	1.72e-11	73.2	47.31
41732	XP_017460837.1	27.876	226	133	8	30	677	123	328	2.2e-11	72.8	48.23
41732	XP_018795309.1	28.571	133	94	1	60	455	95	227	3.44e-11	70.9	58.65
41732	XP_017471367.1	24.39	205	133	3	21	626	40	225	4.39e-11	71.2	43.41
41732	XP_024223407.1	25.283	265	142	8	33	731	187	427	8.84e-11	71.6	43.77
41732	XP_012236262.1	28.571	196	110	4	21	581	159	333	1.06e-10	71.6	45.92
41732	XP_019548800.1	26.364	220	138	7	132	731	37	252	1.26e-10	71.2	45.91
41732	XP_015602065.1	24.67	227	124	9	189	731	26	251	1.57e-10	70.5	45.81
41732	XP_017061640.1	29.801	151	99	3	195	635	1	148	1.86e-10	67.8	47.68
41732	XP_017469979.1	29.655	145	101	1	21	452	180	324	2.56e-10	70.1	50.34
41732	XP_011064802.1	30.128	156	84	5	300	704	1	152	3.16e-10	67	47.44
41732	XP_001810078.1	28.283	198	126	4	45	629	100	284	3.52e-10	70.1	45.45
41736	XP_011197767.2	37.624	202	106	6	67	666	150	333	6.97e-24	108	59.41
41736	XP_021188248.1	27.111	225	149	4	19	672	1862	2078	1.29e-18	95.5	52.89
41736	XP_011549795.1	29.327	208	131	4	7	615	1810	2006	6.54e-16	87.4	50
41736	XP_005189705.1	27.315	216	137	6	67	714	2	197	1.46e-13	80.1	50.93
41736	XP_017469654.1	26.522	230	147	5	4	666	1794	2010	1e-10	72	49.13
41736	XP_017481152.1	26.522	230	147	5	4	666	318	534	1.35e-10	71.6	49.13
41736	XP_011550690.1	25.15	167	109	4	7	492	1869	2024	3.31e-10	70.5	47.9
41736	XP_021199844.1	22.222	180	125	3	4	525	544	714	5.86e-10	69.7	48.89
41736	XP_014759057.1	22.159	176	124	3	154	660	28	197	1.7e-09	67.8	53.41
41736	XP_011560756.1	25.478	157	113	2	151	612	755	910	2.54e-09	68.2	55.41
41736	XP_017475897.1	22.043	186	140	2	154	699	600	784	3.83e-09	67.4	51.61
41736	XP_023711221.1	24.623	199	140	5	64	639	5	200	5.17e-08	63.9	49.75
41736	XP_021193955.1	24.766	214	148	4	25	645	1132	1339	1.58e-07	62.4	50.47
41736	XP_023715320.1	25.146	171	120	4	148	639	41	210	1.5e-06	58.9	49.71
41736	XP_020298131.1	25.604	207	131	7	73	642	205	405	3.51e-06	58.2	48.79
41736	XP_017482624.1	34.821	112	72	1	334	666	1848	1959	9.35e-06	57.4	57.14
41736	XP_012146538.1	26.257	179	110	6	178	657	6	181	1.03e-05	57	49.16
41736	XP_023720419.1	24.39	205	131	4	136	678	17	221	0.000128	53.5	45.37
41736	XP_023721659.1	24.39	205	131	4	136	678	17	221	0.000136	53.5	45.37
41736	XP_023726125.1	24.39	205	131	4	136	678	17	221	0.000162	53.1	45.37
41736	XP_023728094.1	24.39	205	131	4	136	678	17	221	0.000444	52	44.88
41736	XP_023711248.1	24.39	205	131	4	136	678	17	221	0.000482	52	44.88
41736	XP_023717363.1	24.39	205	131	4	136	678	17	221	0.000491	52	44.88
41736	XP_016842257.1	27.007	137	76	5	217	591	53	177	0.000776	50.1	51.82
41736	XP_019844819.1	34.343	99	65	0	472	768	1	99	0.000784	50.8	60.61
41740	XP_017490395.1	58.491	106	44	0	711	394	194	299	6.77e-37	145	79.25
41740	XP_017473020.1	51.852	108	38	1	714	391	291	384	8.15e-29	117	64.81
41740	XP_017473020.1	62.5	24	9	0	782	711	268	291	8.15e-29	37.4	79.17
41740	XP_017492099.1	63.095	84	31	0	714	463	201	284	5.59e-28	114	72.62
41740	XP_017492099.1	62.5	24	9	0	782	711	178	201	5.59e-28	36.6	79.17
41740	XP_017469880.1	55.435	92	41	0	666	391	231	322	4.91e-26	113	73.91
41740	XP_017470172.1	46.316	95	51	0	678	394	226	320	8.94e-21	100	68.42
41740	XP_016659729.1	42.391	92	51	1	696	421	264	353	1.25e-14	83.2	65.22
41740	XP_016657459.1	35.922	103	64	2	696	388	180	280	3.32e-13	79.3	60.19
41740	XP_015365118.1	35.833	120	70	3	696	352	112	229	3.69e-13	77.4	57.5
41740	XP_017479775.1	44.706	85	46	1	672	421	19	103	1.46e-12	76.3	62.35
41740	XP_016658204.1	31.933	119	73	2	696	358	163	279	2.76e-12	75.9	56.3
41740	XP_022819396.1	41.573	89	51	1	687	421	297	384	2.41e-11	73.9	59.55
41740	XP_022164153.1	40.426	94	54	1	696	415	204	295	6.32e-11	72	58.51
41740	XP_014364408.1	40.217	92	54	1	696	421	294	384	9.71e-11	72	63.04
41740	XP_008181229.1	35.345	116	66	3	696	367	144	256	1.28e-10	71.6	60.34
41740	XP_017155782.1	39.773	88	51	1	696	433	429	514	2.06e-10	71.2	59.09
41740	XP_023309172.1	53.846	52	24	0	717	562	136	187	2.51e-10	64.3	73.08
41740	XP_023309172.1	45.833	24	13	0	782	711	113	136	2.51e-10	27.7	70.83
41740	XP_016658382.1	37.778	90	54	1	696	427	220	307	2.91e-10	70.1	62.22
41740	XP_008188136.1	37.234	94	56	2	705	424	10	100	6.25e-10	67	56.38
41740	XP_015433588.1	34.409	93	60	1	696	418	241	332	5.37e-08	63.5	60.22
41740	XP_015018137.1	37.209	86	49	2	687	439	335	418	1.49e-07	62.4	58.14
41740	XP_015840345.1	32.967	91	59	1	696	424	300	388	3.19e-07	61.2	56.04
41740	XP_011557959.1	36.17	94	55	4	696	421	399	489	3.29e-07	61.6	62.77
41740	XP_021190331.1	36.792	106	62	4	723	412	1926	2028	3.5e-07	61.6	61.32
41740	XP_015438115.1	33.333	93	61	1	696	418	219	310	4.27e-07	60.8	59.14
41740	XP_015839981.1	31.25	96	64	1	711	424	269	362	8.64e-07	60.1	53.12
41740	XP_017473031.1	64.865	37	13	0	113	3	102	138	1.39e-06	58.2	81.08
41740	XP_022916588.1	41.25	80	45	1	666	427	2	79	1.45e-06	59.7	55
41740	XP_018905219.1	26.23	122	77	3	711	370	324	440	1.46e-06	59.3	51.64
41740	XP_017473177.1	64.865	37	13	0	113	3	102	138	1.62e-06	58.2	81.08
41740	XP_012246638.1	34	100	63	2	711	418	282	380	2.38e-06	58.5	56
41740	WP_048819153.1	62.162	37	14	0	113	3	102	138	8.21e-06	55.5	81.08
41740	XP_015028875.1	32.941	85	57	0	690	436	398	482	9.75e-06	57	56.47
41740	XP_015031652.1	32.941	85	57	0	690	436	398	482	1.03e-05	57	56.47
41740	XP_018574832.1	29.412	119	78	2	708	364	232	348	1.03e-05	56.6	45.38
41740	XP_015025716.1	32.941	85	57	0	690	436	398	482	1.24e-05	56.6	56.47
41740	XP_015026279.1	32.941	85	57	0	690	436	398	482	1.24e-05	56.6	56.47
41740	XP_015373325.1	33.696	92	56	2	696	430	251	340	1.39e-05	56.2	54.35
41740	XP_018913129.1	30.108	93	64	1	696	421	372	464	3.2e-05	55.5	53.76
41740	XP_011858480.1	50	38	19	0	116	3	91	128	5.16e-05	54.7	73.68
41740	XP_018332895.1	32.967	91	59	1	696	424	175	263	5.46e-05	54.7	50.55
41740	XP_011304618.1	33.708	89	56	3	696	436	330	417	7.1e-05	54.3	57.3
41740	XP_018494237.1	35.632	87	54	1	666	406	8	92	7.2e-05	52.4	51.72
41740	XP_015023672.1	32.609	92	59	1	690	415	238	326	9.98e-05	53.9	53.26
41740	XP_018910285.1	31.2	125	78	4	711	355	507	629	0.000118	53.9	49.6
41740	XP_013783022.1	36.709	79	46	2	663	430	124	199	0.000122	52.8	56.96
41740	XP_023310999.1	33.333	78	50	1	672	439	557	632	0.000187	53.1	51.28
41740	XP_023247958.1	33.735	83	55	0	696	448	382	464	0.000221	52.8	50.6
41740	XP_017794534.1	59.459	37	15	0	113	3	106	142	0.000299	52	70.27
41740	XP_022825714.1	32.941	85	54	2	696	442	539	620	0.00034	52.4	57.65
41740	XP_022825713.1	32.941	85	54	2	696	442	553	634	0.000414	52	57.65
41740	XP_014285354.1	35.227	88	55	1	696	433	88	173	0.000429	52	54.55
41740	XP_023021795.1	30.526	95	64	1	696	412	340	432	0.000607	51.6	50.53
41740	XP_018405166.1	42.105	57	32	1	173	3	148	203	0.000626	51.6	59.65
41740	XP_015911269.1	32.53	83	54	1	696	448	236	316	0.000725	51.2	54.22
41742	XP_019038000.1	95.455	88	4	0	785	522	307	394	9.57e-50	178	97.73
41742	XP_011277219.1	92.222	90	7	0	785	516	488	577	1.4e-48	178	95.56
41742	XP_020073621.1	91.011	89	8	0	785	519	234	322	4.62e-48	171	93.26
41742	XP_020066326.1	87.64	89	11	0	785	519	469	557	4.29e-46	171	94.38
41742	XP_018172557.2	86.667	90	12	0	785	516	435	524	5.09e-46	170	93.33
41742	XP_004178008.1	87.778	90	11	0	785	516	769	858	1.14e-45	173	92.22
41742	XP_001385548.2	87.912	91	9	1	785	519	236	326	1.47e-45	164	93.41
41742	XP_006688559.1	90.361	83	8	0	785	537	240	322	3.02e-45	163	97.59
41742	XP_003871042.1	91.566	83	7	0	785	537	538	620	1.01e-44	168	97.59
41742	XP_001482554.1	85.393	89	13	0	785	519	477	565	1.02e-44	167	93.26
41742	XP_007373565.1	91.566	83	7	0	785	537	376	458	1.29e-44	165	96.39
41742	XP_002619471.1	86.364	88	12	0	785	522	412	499	1.39e-44	166	93.18
41742	XP_001525150.1	91.566	83	7	0	785	537	538	620	1.9e-44	167	97.59
41742	XP_003677923.1	89.286	84	9	0	785	534	694	777	2.85e-44	169	95.24
41742	XP_003669000.1	89.286	84	9	0	785	534	752	835	3.66e-44	169	95.24
41742	XP_003645979.1	86.517	89	12	0	785	519	568	656	5.53e-44	167	92.13
41742	NP_013696.1	86.364	88	12	0	785	522	591	678	7.11e-44	167	92.05
41742	XP_002555221.1	86.364	88	12	0	785	522	575	662	7.49e-44	166	92.05
41742	XP_459586.2	88.235	85	10	0	785	531	485	569	8.75e-44	165	95.29
41742	XP_002491308.1	88.636	88	10	0	785	522	450	537	9.59e-44	164	93.18
41742	XP_018220050.1	86.364	88	12	0	785	522	598	685	1.08e-43	166	92.05
41742	XP_003956675.1	90.476	84	8	0	785	534	621	704	1.5e-43	166	95.24
41742	XP_001646773.1	85.227	88	13	0	785	522	628	715	1.86e-43	166	92.05
41742	XP_017988633.1	85.393	89	13	0	785	519	571	659	2.19e-43	165	91.01
41742	NP_985190.2	86.364	88	12	0	785	522	564	651	2.36e-43	165	92.05
41742	XP_018223962.1	88.095	84	10	0	785	534	628	711	4.83e-43	164	95.24
41742	XP_002496999.1	89.286	84	9	0	785	534	671	754	5.1e-43	165	95.24
41742	NP_010724.1	88.095	84	10	0	785	534	626	709	6.11e-43	164	95.24
41742	XP_022630461.1	88.095	84	10	0	785	534	552	635	6.29e-43	164	95.24
41742	XP_015466427.1	87.059	85	11	0	785	531	481	565	6.68e-43	162	94.12
41742	XP_451580.1	88.095	84	10	0	785	534	560	643	8.45e-43	163	95.24
41742	XP_003678954.1	84.27	89	14	0	785	519	583	671	1.49e-42	163	89.89
41742	XP_022676441.1	88.095	84	10	0	785	534	582	665	1.75e-42	162	95.24
41742	XP_018986662.1	88.095	84	10	0	785	534	370	453	2.57e-42	159	94.05
41742	XP_003687610.1	86.905	84	11	0	785	534	601	684	3.53e-42	162	94.05
41742	XP_003685318.1	88.095	84	10	0	785	534	620	703	3.83e-42	162	94.05
41742	XP_020047447.1	84.524	84	13	0	785	534	514	597	3.88e-42	162	96.43
41742	XP_018209249.1	89.157	83	9	0	785	537	304	386	5.8e-42	157	92.77
41742	XP_013936683.1	89.157	83	9	0	785	537	368	450	8.34e-42	157	92.77
41742	XP_022463046.1	85.714	84	12	0	785	534	621	704	1.11e-41	160	95.24
41742	XP_446110.1	88.889	81	9	0	785	543	593	673	2.73e-41	159	95.06
41742	XP_504610.2	86.747	83	11	0	785	537	423	505	2.77e-41	157	92.77
41742	XP_022463668.1	87.805	82	10	0	785	540	579	660	4.04e-41	159	93.9
41742	XP_018735675.1	86.207	87	12	0	785	525	580	666	6.6e-41	158	89.66
41742	XP_002545825.1	86.585	82	11	0	785	540	417	498	9.9e-41	155	95.12
41742	XP_447006.1	84.524	84	13	0	785	534	496	579	1.52e-40	156	94.05
41742	XP_002422157.1	86.42	81	11	0	785	543	398	478	1.78e-40	154	93.83
41742	XP_020050638.1	84.337	83	13	0	785	537	233	315	1.92e-40	150	92.77
41742	XP_713085.1	86.42	81	11	0	785	543	399	479	2.83e-40	154	93.83
41742	XP_019017954.1	86.747	83	11	0	785	537	293	375	3.1e-40	152	91.57
41742	XP_020543863.1	85.882	85	12	0	785	531	363	447	4.01e-40	153	90.59
41742	XP_022457476.1	88.75	80	9	0	785	546	413	492	1.89e-39	152	93.75
41742	XP_002841873.1	81.818	88	14	1	785	522	226	311	9.25e-39	146	88.64
41742	XP_011117125.1	81.25	80	15	0	785	546	460	539	4.14e-36	144	88.75
41742	XP_007787462.1	81.25	80	15	0	785	546	452	531	9.5e-36	145	88.75
41742	XP_018710307.1	84.444	90	14	0	785	516	231	320	9.84e-36	139	90
41742	XP_022497586.1	81.481	81	15	0	785	543	456	536	9.95e-36	145	86.42
41742	XP_006966772.1	81.481	81	15	0	785	543	423	503	1.16e-35	142	90.12
41742	XP_020130008.1	81.481	81	15	0	785	543	432	512	1.34e-35	142	87.65
41742	XP_018128952.1	82.5	80	14	0	785	546	434	513	1.56e-35	142	87.5
41742	XP_013424868.1	81.481	81	15	0	785	543	431	511	1.68e-35	142	88.89
41742	XP_013339521.1	81.481	81	15	0	785	543	433	513	1.7e-35	142	88.89
41742	XP_003718979.1	81.481	81	15	0	785	543	427	507	2.17e-35	141	88.89
41742	XP_018041090.1	81.481	81	15	0	785	543	435	515	2.2e-35	142	87.65
41742	XP_007720164.1	81.481	81	15	0	785	543	457	537	2.44e-35	142	86.42
41742	XP_007736011.1	81.481	81	15	0	785	543	457	537	2.73e-35	142	86.42
41742	XP_013288055.1	81.481	81	15	0	785	543	456	536	3.02e-35	141	86.42
41742	XP_016625615.1	81.481	81	15	0	785	543	457	537	3.05e-35	141	86.42
41742	XP_009220034.1	81.481	81	15	0	785	543	435	515	3.08e-35	141	87.65
41742	XP_007739408.1	81.481	81	15	0	785	543	456	536	3.11e-35	141	86.42
41742	XP_013938593.1	81.481	81	15	0	785	543	415	495	3.2e-35	141	87.65
41742	XP_018695633.1	81.481	81	15	0	785	543	456	536	3.31e-35	141	86.42
41742	XP_009220035.1	81.481	81	15	0	785	543	435	515	3.35e-35	141	87.65
41742	XP_016630199.1	81.481	81	15	0	785	543	456	536	3.38e-35	141	86.42
41742	XP_016250553.1	81.481	81	15	0	785	543	456	536	3.41e-35	141	86.42
41742	XP_013265564.1	81.481	81	15	0	785	543	456	536	3.55e-35	141	86.42
41742	XP_022474615.1	80.247	81	16	0	785	543	433	513	3.61e-35	141	87.65
41742	XP_018656852.1	81.481	81	15	0	785	543	415	495	3.77e-35	140	87.65
41742	XP_008089596.1	80.247	81	16	0	785	543	434	514	3.96e-35	141	87.65
41742	XP_002542816.1	81.25	80	15	0	785	546	445	524	4.34e-35	141	87.5
41742	XP_001240887.1	81.25	80	15	0	785	546	439	518	4.41e-35	141	87.5
41742	XP_018158517.1	80.247	81	16	0	785	543	433	513	4.47e-35	140	87.65
41742	XP_003065200.1	81.25	80	15	0	785	546	439	518	4.54e-35	140	87.5
41742	XP_013959523.1	81.481	81	15	0	785	543	424	504	4.9e-35	140	87.65
41742	XP_009152815.1	80.247	81	16	0	785	543	458	538	6.26e-35	140	86.42
41742	XP_016217150.1	79.268	82	17	0	785	540	432	513	6.26e-35	140	85.37
41742	XP_002620183.1	81.25	80	15	0	785	546	446	525	6.46e-35	142	87.5
41742	XP_023879000.1	76.136	88	19	1	785	522	436	521	6.47e-35	140	85.23
41742	XP_023892583.1	76.136	88	19	1	785	522	436	521	6.54e-35	140	85.23
41742	XP_018144030.1	80.247	81	16	0	785	543	444	524	6.78e-35	140	87.65
41742	XP_007816916.2	80.247	81	16	0	785	543	444	524	6.78e-35	140	87.65
41742	XP_002849548.1	80	80	16	0	785	546	429	508	6.9e-35	140	87.5
41742	XP_007777950.1	80.247	81	16	0	785	543	443	523	7.06e-35	140	87.65
41742	XP_014544509.1	80.247	81	16	0	785	543	444	524	7.35e-35	140	87.65
41742	XP_016226268.1	80.247	81	16	0	785	543	451	531	7.59e-35	140	86.42
41742	XP_023629205.1	80.247	81	16	0	785	543	443	523	8.05e-35	140	87.65
41742	XP_013267608.1	80.247	81	16	0	785	543	457	537	8.32e-35	140	86.42
41742	XP_013322521.1	80.247	81	16	0	785	543	457	537	9.68e-35	140	86.42
41742	XP_003170232.1	80	80	16	0	785	546	437	516	9.82e-35	140	87.5
41742	XP_003233963.1	80	80	16	0	785	546	437	516	1e-34	140	87.5
41746	WP_080511231.1	95.122	82	4	0	228	473	1	82	2.75e-46	158	98.78
41746	WP_074512569.1	90	80	8	0	241	2	17	96	2.59e-43	152	93.75
41746	WP_071835629.1	95.89	73	2	1	220	2	24	95	1.52e-40	145	97.26
41746	WP_071882979.1	97.015	67	2	0	202	2	26	92	6.96e-38	138	98.51
41746	WP_077627238.1	98.529	68	1	0	228	431	1	68	9.01e-37	134	100
41746	WP_011078084.1	100	64	0	0	193	2	22	85	1.92e-36	134	100
41746	WP_083428574.1	100	61	0	0	249	431	14	74	1.52e-32	123	100
41746	WP_084387842.1	100	61	0	0	249	431	5	65	1.64e-32	122	100
41746	WP_097454057.1	100	61	0	0	249	431	13	73	1.65e-32	123	100
41746	WP_084299114.1	100	60	0	0	252	431	13	72	7.15e-32	121	100
41746	WP_081840950.1	98.276	58	1	0	258	431	3	60	3.06e-29	114	100
41746	WP_071784514.1	71.605	81	17	4	262	35	2	81	2.29e-23	100	76.54
41746	WP_073520227.1	87.234	47	6	0	142	2	20	66	2.1e-18	87	91.49
41746	WP_097737507.1	95.349	43	2	0	130	2	26	68	3.37e-18	86.3	97.67
41746	WP_089518167.1	85.106	47	7	0	142	2	20	66	5.35e-18	85.9	91.49
41746	WP_010889871.1	91.304	46	4	0	261	398	22	67	1.14e-17	84.7	95.65
41746	WP_105329836.1	87.755	49	5	1	181	35	4	51	1.18e-17	84.7	89.8
41746	WP_081443702.1	95.349	43	2	0	261	389	8	50	7.49e-17	82	97.67
41746	WP_077138112.1	70.909	55	16	0	166	2	9	63	3.6e-16	80.9	78.18
41746	WP_077877995.1	80.851	47	9	0	258	398	15	61	4.13e-14	75.1	82.98
41746	WP_071567531.1	79.592	49	9	1	181	35	4	51	4.41e-14	75.1	81.63
41746	WP_102167003.1	88.372	43	5	0	384	256	47	89	5.42e-14	75.5	93.02
41746	WP_102167003.1	74.286	35	9	0	355	251	1	35	1.6e-06	55.1	80
41746	WP_085764018.1	94.737	38	2	0	148	35	3	40	6.95e-14	74.3	97.37
41746	WP_071552216.1	94.737	38	2	0	148	35	17	54	1.66e-13	73.9	97.37
41746	WP_084456140.1	94.595	37	2	0	145	35	6	42	3.93e-13	72.4	97.3
41746	WP_077823953.1	85.366	41	6	0	258	380	15	55	2.52e-12	70.1	87.8
41746	WP_077636791.1	85.366	41	6	0	258	380	15	55	2.74e-12	70.1	87.8
41746	WP_077826300.1	87.5	40	5	0	261	380	22	61	3e-12	70.1	90
41746	WP_072847511.1	43.011	93	32	1	258	473	25	117	3e-11	68.9	54.84
41746	WP_072141485.1	80.488	41	8	0	258	380	15	55	4.79e-11	66.6	85.37
41746	WP_074149399.1	96.97	33	1	0	273	371	1	33	9.53e-11	65.9	100
41746	WP_100212952.1	93.939	33	2	0	355	257	1	33	1.69e-10	65.5	96.97
41746	WP_073450877.1	74.359	39	10	0	258	374	25	63	6.47e-10	64.3	82.05
41746	WP_078126609.1	71.739	46	11	1	261	398	22	65	2.28e-09	62.4	76.09
41746	WP_074161185.1	78.378	37	8	0	355	245	1	37	2.34e-09	62.4	83.78
41746	WP_077885061.1	90.625	32	3	0	355	260	1	32	3.68e-09	62	93.75
41746	WP_072052105.1	85.294	34	5	0	151	50	1	34	2.83e-08	59.3	91.18
41746	WP_072131864.1	84.615	26	3	1	395	321	56	81	1.6e-07	44.7	92.31
41746	WP_072131864.1	69.565	23	7	0	465	397	19	41	1.6e-07	38.1	82.61
41746	WP_086405453.1	84	25	3	1	395	324	56	80	3.62e-07	42.7	92
41746	WP_086405453.1	73.913	23	6	0	465	397	19	41	3.62e-07	38.5	82.61
41746	WP_001751880.1	84	25	3	1	395	324	56	80	3.68e-07	42.7	92
41746	WP_001751880.1	73.913	23	6	0	465	397	19	41	3.68e-07	38.5	82.61
41746	WP_103433989.1	96	25	1	0	395	321	38	62	4.19e-07	52.8	96
41746	WP_103433989.1	81.25	16	3	0	444	397	8	23	4.19e-07	28.5	87.5
41746	WP_032189073.1	92	25	2	0	395	321	56	80	4.37e-07	51.2	100
41746	WP_032189073.1	60.87	23	9	0	465	397	19	41	4.37e-07	29.6	69.57
41746	WP_015059336.1	85	40	6	0	261	380	22	61	5.74e-07	55.8	87.5
41746	WP_106421678.1	84	25	3	1	395	324	72	96	6.78e-07	42.4	92
41746	WP_106421678.1	73.913	23	6	0	465	397	35	57	6.78e-07	38.5	82.61
41746	WP_077882180.1	50.877	57	28	0	355	185	1	57	8.35e-07	55.1	64.91
41746	WP_080816737.1	50.877	57	28	0	355	185	1	57	1.88e-06	54.3	63.16
41746	WP_104469730.1	100	25	0	0	395	321	50	74	2.05e-06	54.3	100
41746	WP_075332509.1	48.485	66	31	1	276	473	1	63	3.4e-06	53.5	57.58
41746	WP_071601800.1	51.613	62	13	1	339	473	1	62	3.74e-06	53.5	58.06
41746	WP_077816427.1	84.615	26	3	1	395	321	48	73	1.13e-05	43.1	92.31
41746	WP_077816427.1	65.217	23	8	0	465	397	11	33	1.13e-05	33.1	73.91
41746	WP_013572688.1	96	25	1	0	304	378	12	36	1.35e-05	51.2	100
41746	WP_024129974.1	60	30	12	0	384	473	31	60	1.57e-05	41.2	80
41746	WP_024129974.1	85	20	3	0	338	397	2	21	1.57e-05	34.7	85
41746	WP_096954634.1	92	25	2	0	395	321	56	80	3.1e-05	51.2	100
41746	WP_106505283.1	92	25	2	0	395	321	39	63	3.59e-05	50.8	100
41746	WP_096896543.1	92	25	2	0	395	321	48	72	3.84e-05	50.8	100
41746	WP_077818352.1	52.83	53	22	1	479	321	23	72	4.46e-05	50.8	69.81
41746	WP_072025265.1	76.923	26	5	1	395	321	56	81	0.000116	38.9	84.62
41746	WP_072025265.1	69.565	23	7	0	465	397	19	41	0.000116	33.9	73.91
41746	WP_072208949.1	88	25	3	0	395	321	57	81	0.000199	49.3	96
41746	WP_050559703.1	91.667	24	2	0	260	331	65	88	0.000253	48.9	95.83
41750	XP_011274765.1	61.789	123	38	2	458	802	15	136	6.12e-46	160	75.61
41750	XP_019038477.1	62.81	121	34	2	467	799	19	138	4.33e-44	155	73.55
41750	XP_020068955.1	64.356	101	35	1	488	790	16	115	3.1e-38	140	80.2
41750	XP_457454.1	52.8	125	48	7	455	799	15	138	3.11e-29	117	67.2
41750	XP_007374372.1	57.009	107	40	5	494	799	34	139	5.22e-28	114	71.03
41750	XP_001486065.1	51.22	123	51	7	470	814	40	161	2.29e-27	113	68.29
41750	XP_020045532.1	52.083	96	45	1	506	793	46	140	3.86e-27	112	68.75
41750	XP_013933134.1	51.429	105	48	3	482	793	27	129	8.04e-27	111	71.43
41750	XP_015469287.1	50	120	49	6	464	793	1	119	1.11e-26	110	66.67
41750	XP_018171924.1	55	100	40	4	515	802	45	143	1.88e-26	110	69
41750	XP_018298212.1	48.571	105	52	2	488	802	25	127	2.06e-26	109	64.76
41750	XP_018211920.1	51.485	101	46	3	494	793	31	129	3.95e-26	109	72.28
41750	XP_018983762.1	45.536	112	58	3	461	793	15	124	4.18e-26	109	65.18
41750	XP_002619379.1	54	100	41	4	515	802	41	139	1.23e-25	108	68
41750	XP_006684066.1	48.031	127	54	7	455	802	9	134	1.31e-25	108	67.72
41750	XP_714455.1	51.724	116	46	6	479	799	33	147	3.58e-25	107	65.52
41750	XP_002491961.1	53.684	95	41	3	512	793	35	127	5.11e-25	106	69.47
41750	XP_023471207.1	45.714	140	60	5	419	802	4	139	5.28e-25	106	54.29
41750	XP_002547556.1	53.465	101	40	4	509	793	40	139	8.46e-25	106	68.32
41750	XP_001384173.1	53.774	106	42	5	494	793	14	118	1.45e-24	105	67.92
41750	XP_018711065.1	45.865	133	53	7	458	802	8	139	1.5e-24	105	61.65
41750	XP_002418752.1	47.656	128	46	6	470	793	17	143	5.07e-24	104	60.94
41750	XP_001908022.1	48.485	99	49	2	506	802	53	149	1.01e-23	103	60.61
41750	XP_020075021.1	50	104	45	5	509	802	33	135	1.23e-23	103	67.31
41750	XP_007880372.1	41.86	129	73	2	413	799	39	165	1.31e-23	103	55.04
41750	XP_503013.2	49.505	101	45	3	512	799	37	136	1.35e-23	102	65.35
41750	XP_018737545.1	48.515	101	50	2	512	814	38	136	2.34e-23	102	62.38
41750	XP_022457837.1	52.632	95	42	3	512	793	36	128	2.49e-23	102	67.37
41750	XP_001526205.1	50	116	48	5	479	799	50	164	3.62e-23	102	63.79
41750	XP_007000470.1	47.115	104	53	2	491	802	4	105	3.62e-23	100	64.42
41750	XP_002835064.1	45.283	106	56	2	515	832	61	164	6e-23	102	60.38
41750	XP_019019084.1	54.255	94	40	3	515	793	60	151	8.44e-23	101	68.09
41750	XP_003868742.1	48.148	108	49	4	494	799	64	170	1.09e-22	101	63.89
41750	XP_014564749.1	47.475	99	50	2	503	799	101	197	1.45e-22	102	61.62
41750	XP_001828709.2	45.794	107	54	3	488	802	41	145	1.46e-22	100	59.81
41750	XP_020067429.1	52	100	41	5	512	793	44	142	1.88e-22	100	68
41750	XP_003655132.1	46.535	101	52	2	500	802	81	179	2.88e-22	100	58.42
41750	XP_003710567.1	41	100	57	2	503	802	58	155	3.38e-22	100	61
41750	XP_009267110.1	50.515	97	46	2	512	802	60	154	3.96e-22	99.4	61.86
41750	XP_007763448.1	45.192	104	53	3	497	802	37	138	4.08e-22	99	60.58
41750	XP_007360215.1	41.803	122	62	3	458	802	12	131	1e-21	97.8	54.92
41750	XP_014169935.1	39.45	109	64	2	476	802	56	162	1.11e-21	99	59.63
41750	XP_006959863.1	50.526	95	45	2	515	799	45	137	1.37e-21	97.4	62.11
41750	XP_009217392.1	39.45	109	64	2	476	802	46	152	2.69e-21	97.4	55.96
41750	XP_008097364.1	43.434	99	54	2	506	802	56	152	2.72e-21	97.4	58.59
41750	XP_019024125.1	45.918	98	47	3	515	802	54	147	2.74e-21	97.4	61.22
41750	XP_011119737.1	44.231	104	56	2	503	814	66	167	2.99e-21	97.8	61.54
41750	XP_020129273.1	40.351	114	66	2	473	814	69	180	4.57e-21	98.2	58.77
41750	XP_016293105.1	47.423	97	49	2	509	799	64	158	5.7e-21	96.7	61.86
41750	XP_018130374.1	48.958	96	47	2	515	802	76	169	5.9e-21	97.8	62.5
41750	XP_007821967.2	39.286	112	65	3	470	802	39	148	6.03e-21	96.7	58.93
41750	XP_018035193.1	38.793	116	69	2	467	814	52	165	9.19e-21	97.1	56.9
41750	XP_016642719.1	43.299	97	53	2	512	802	48	142	9.58e-21	95.9	60.82
41750	XP_018709077.1	41.837	98	56	1	509	802	55	151	1.01e-20	95.9	57.14
41750	XP_001873797.1	44.34	106	55	3	491	802	37	140	1.61e-20	94.7	61.32
41750	XP_956169.1	43.878	98	53	2	509	802	55	150	1.7e-20	95.5	60.2
41750	XP_011326575.1	43.878	98	53	2	509	802	54	149	1.74e-20	95.5	58.16
41750	XP_007809450.1	38.393	112	66	3	470	802	6	115	1.76e-20	94.4	58.04
41750	XP_009851247.1	44.33	97	52	2	509	799	55	149	1.79e-20	95.5	59.79
41750	XP_003052197.1	43.878	98	53	2	509	802	54	149	2.13e-20	95.1	59.18
41750	XP_008597427.1	40.816	98	57	1	509	802	55	151	2.15e-20	95.1	57.14
41750	XP_018762102.1	43.878	98	53	2	509	802	54	149	2.22e-20	95.1	58.16
41750	XP_009263143.1	43.878	98	53	2	509	802	54	149	2.22e-20	95.1	58.16
41750	XP_016591397.1	41.026	117	59	3	476	802	42	156	2.35e-20	95.1	56.41
41750	XP_006454334.1	44.444	99	51	3	512	802	41	137	2.42e-20	94	63.64
41750	XP_021885075.1	47.525	101	49	3	506	802	42	140	2.46e-20	94.4	59.41
41750	XP_001266325.1	45.833	96	50	2	515	802	84	177	3.03e-20	95.9	59.38
41750	XP_748134.1	45.833	96	50	2	515	802	84	177	3.23e-20	95.9	59.38
41750	XP_002544475.1	40.541	111	64	2	470	802	99	207	3.34e-20	96.7	57.66
41750	XP_002568482.1	45.833	96	50	2	515	802	75	168	3.75e-20	95.5	60.42
41750	XP_021871446.1	45.833	96	50	2	512	799	51	144	3.94e-20	94	62.5
41750	XP_011391563.1	45.455	99	52	2	503	799	61	157	4.32e-20	94.4	59.6
41750	XP_003069723.1	40.909	110	63	2	473	802	72	179	4.6e-20	95.5	57.27
41750	XP_022472756.1	43.434	99	54	2	506	802	56	152	4.63e-20	94.4	58.59
41750	XP_006667866.1	39.796	98	58	1	509	802	55	151	4.7e-20	94.4	57.14
41750	XP_007404206.1	44.792	96	51	2	515	802	61	154	5.01e-20	94	60.42
41750	XP_001820376.1	44.792	96	51	2	515	802	85	178	6.08e-20	95.1	58.33
41750	XP_018993116.1	46.392	97	50	2	509	799	46	140	6.27e-20	93.2	61.86
41750	XP_023428047.1	42.857	98	54	2	509	802	54	149	6.93e-20	93.6	58.16
41750	XP_022395939.1	44.792	96	51	2	515	802	83	176	6.94e-20	95.1	59.38
41750	XP_014549210.1	37.5	112	67	3	470	802	39	148	7.05e-20	93.6	58.04
41750	XP_018235028.1	42.857	98	54	2	509	802	54	149	8.11e-20	93.6	58.16
41750	XP_003663174.1	45.161	93	49	2	524	802	78	168	8.73e-20	94	58.06
41750	XP_001242519.1	40.909	110	63	2	473	802	121	228	1.07e-19	95.9	57.27
41750	XP_003348893.1	41.837	98	55	2	509	802	56	151	1.41e-19	92.8	60.2
41750	XP_015406723.1	44.792	96	51	2	515	802	96	189	1.64e-19	94.4	58.33
41750	XP_001400249.2	45.833	96	50	2	515	802	84	177	2.02e-19	94	58.33
41750	XP_018147007.1	39.796	98	57	2	509	802	55	150	2.02e-19	92.4	59.18
41750	XP_013241496.1	41	100	57	2	500	799	70	167	2.03e-19	92.8	61
41750	XP_003324259.1	43.878	98	53	2	506	799	47	142	2.07e-19	92	57.14
41750	XP_568266.1	45.361	97	51	2	509	799	46	140	2.6e-19	91.7	60.82
41750	XP_001550729.1	39.286	112	66	2	467	802	62	171	3.05e-19	92.8	54.46
41750	XP_009492431.1	47.674	86	44	1	536	793	42	126	3.35e-19	90.9	61.63
41750	XP_016596944.1	43.75	96	52	2	515	802	83	176	3.99e-19	93.2	59.38
41750	XP_681318.1	43.75	96	52	2	515	802	81	174	4.16e-19	93.2	60.42
41750	XP_007307606.1	41.667	108	61	2	479	802	36	141	4.36e-19	91.3	55.56
41750	XP_003197407.1	46.392	97	48	2	509	799	46	138	4.52e-19	90.9	60.82
41750	XP_001590181.1	40	110	64	2	473	802	64	171	4.53e-19	92.8	54.55
41750	XP_014533788.1	43.75	96	52	2	515	802	83	176	6.48e-19	92.4	59.38
41750	XP_018073548.1	38.182	110	66	2	473	802	64	171	7.29e-19	92	55.45
41752	XP_017475964.1	57.576	297	113	5	7	873	169	460	2.32e-100	314	75.76
41752	XP_013116782.1	51.689	296	132	4	7	873	86	377	2.67e-90	283	71.96
41752	XP_004521959.1	54.576	295	120	4	1	873	212	496	2.84e-89	288	73.22
41752	XP_013113698.1	51.351	296	133	4	7	873	394	685	1.12e-88	288	72.3
41752	XP_004524230.1	60.793	227	85	2	205	873	4	230	2.74e-87	270	78.85
41752	XP_017461079.1	62.255	204	73	2	274	873	1	204	8.28e-83	256	80.39
41752	XP_011293707.2	57.746	213	88	1	241	873	41	253	8.05e-82	257	80.28
41752	XP_004527554.1	60.784	204	76	2	274	873	1	204	5.16e-77	243	78.43
41752	XP_004530774.1	61.85	173	64	1	361	873	10	182	1.36e-74	238	80.35
41752	XP_018403676.1	43.182	308	156	6	7	873	92	399	1.83e-70	233	64.61
41752	XP_022910534.1	49.013	304	141	6	4	873	523	826	8.27e-70	241	67.43
41752	XP_022912197.1	43.042	309	157	6	4	873	10	318	9.81e-68	224	62.78
41752	XP_021961694.1	50.439	228	107	2	208	873	77	304	9.63e-67	230	70.18
41752	XP_022906842.1	46.503	286	140	6	52	873	102	386	1.54e-66	224	67.83
41752	XP_023223385.1	47.018	285	141	5	49	873	282	566	1.94e-66	234	66.67
41752	XP_012228825.1	46.939	294	137	6	49	873	56	349	2.39e-66	233	68.37
41752	XP_023223405.1	47.018	285	141	5	49	873	282	566	2.96e-66	234	66.67
41752	XP_017796961.1	44.667	300	144	7	40	873	435	734	3.43e-66	231	63.33
41752	XP_014372285.1	42.122	311	156	8	7	873	168	476	1.92e-65	225	64.31
41752	XP_012152117.1	45.515	301	144	7	25	873	247	545	3.13e-65	226	65.78
41752	XP_017795386.1	49.485	291	129	8	49	870	296	585	3.72e-65	230	67.7
41752	XP_015375644.1	50.435	230	106	3	208	873	102	331	3.76e-65	219	75.22
41752	XP_012282266.1	47.719	285	137	5	49	867	587	871	3.82e-65	231	67.37
41752	XP_011562733.1	44.231	312	151	6	7	873	320	631	4.22e-65	226	64.42
41752	XP_022835494.1	45.048	313	150	8	1	873	197	509	7.7e-65	227	62.3
41752	XP_008180911.1	42.466	292	150	5	52	873	201	492	9.26e-65	222	66.1
41752	XP_022914616.1	42.54	315	155	6	7	873	9	323	1.14e-64	214	60.32
41752	XP_022166045.1	41.584	303	154	5	25	873	498	797	1.65e-64	229	64.69
41752	XP_011884091.1	46.441	295	142	6	34	873	549	842	1.93e-64	229	65.42
41752	XP_023237214.1	49.558	226	110	3	208	873	39	264	1.99e-64	215	71.24
41752	XP_011858395.1	46.441	295	142	6	34	873	741	1034	2.37e-64	228	65.42
41752	XP_011172680.1	42.177	294	151	6	49	873	223	516	2.67e-64	221	65.31
41752	XP_022216146.1	43.878	294	150	7	28	873	107	397	3.24e-64	219	62.24
41752	XP_011858842.1	49.123	228	108	3	208	870	99	325	4.25e-64	213	68.86
41752	XP_018395970.1	47.751	289	137	6	49	873	536	824	4.76e-64	227	68.17
41752	XP_017796956.1	48.276	290	133	8	49	870	350	638	4.86e-64	227	67.93
41752	XP_012547781.1	47.368	228	113	3	208	870	7	234	5.4e-64	210	67.11
41752	XP_015916747.2	43.206	287	149	5	52	870	60	346	5.56e-64	219	62.72
41752	XP_023246915.1	42.958	284	151	6	49	873	90	371	7.73e-64	215	63.73
41752	XP_008181389.1	51.304	230	104	3	208	873	40	269	8.99e-64	226	74.35
41752	XP_013189615.1	43.548	310	156	6	1	873	555	864	1.07e-63	226	61.94
41752	XP_017797535.1	44.333	300	145	7	40	873	482	781	1.07e-63	226	63.67
41752	XP_012152116.1	45.515	301	144	7	25	873	567	865	1.36e-63	225	65.78
41752	XP_014215277.1	43.662	284	149	6	49	873	149	430	1.49e-63	222	65.14
41752	XP_021966728.1	49.13	230	111	2	202	873	234	463	2.83e-63	221	70.43
41752	XP_008187174.1	42.14	299	150	6	37	873	74	369	3.23e-63	225	65.22
41752	XP_023013508.1	42.444	311	151	7	7	873	355	659	3.72e-63	220	62.06
41752	XP_023310042.1	43.643	291	148	5	49	873	334	624	3.76e-63	220	63.57
41752	XP_008179889.1	41.017	295	151	5	49	873	123	414	4.35e-63	221	65.08
41752	XP_018395247.1	47.405	289	138	6	49	873	536	824	5.03e-63	224	67.82
41752	XP_003708538.1	43.182	308	157	7	4	873	97	404	6.41e-63	214	59.74
41752	XP_015376787.1	43.333	300	153	4	25	873	590	889	6.83e-63	224	64.67
41752	XP_023744847.1	38.926	298	165	4	31	873	198	495	7.3e-63	216	63.42
41752	XP_022829237.1	51.556	225	104	2	208	867	663	887	1.03e-62	224	71.11
41752	XP_017765119.1	43.151	292	149	7	40	873	258	546	1.16e-62	220	65.07
41752	XP_015438034.1	43.75	304	155	8	7	870	533	836	1.17e-62	223	66.12
41752	XP_013110216.1	63.158	152	54	1	424	873	10	161	1.25e-62	208	81.58
41752	XP_012147726.1	47.26	292	137	7	49	873	598	889	1.26e-62	223	64.38
41752	XP_023247567.1	42.16	287	149	8	49	873	86	367	1.3e-62	211	64.46
41752	XP_021964268.1	49.13	230	111	2	202	873	102	331	1.32e-62	223	71.3
41752	XP_018406075.1	42.071	309	159	8	4	873	277	584	1.36e-62	217	62.78
41752	XP_012217245.1	46.075	293	140	7	49	873	562	854	1.49e-62	221	65.53
41752	XP_011705898.1	46.552	232	114	3	208	873	43	274	1.65e-62	211	72.84
41752	XP_023026712.1	43.73	311	146	8	7	873	32	335	1.88e-62	211	62.38
41752	XP_017796350.1	50.655	229	107	3	202	870	46	274	2.09e-62	207	68.56
41752	XP_018405945.1	44.408	304	153	7	7	873	576	878	2.1e-62	221	63.82
41752	XP_022904006.1	42.123	292	157	4	31	873	32	322	2.37e-62	217	64.73
41752	XP_011565957.1	42.903	310	155	8	7	870	306	615	2.9e-62	218	62.9
41752	XP_011560006.1	44.304	316	147	8	7	873	640	953	3.09e-62	222	63.29
41752	XP_008187175.1	41.806	299	151	6	37	873	596	891	3.12e-62	222	64.88
41752	XP_011169784.1	44.746	295	143	6	49	873	58	352	3.33e-62	221	64.75
41752	XP_004934246.1	48	225	114	2	208	873	25	249	3.7e-62	208	68.44
41752	XP_011171769.1	41.837	294	152	6	49	873	415	708	3.7e-62	220	64.97
41752	XP_011871890.1	41.844	282	153	6	49	867	80	359	4.83e-62	209	65.6
41752	XP_012134488.1	45.862	290	139	8	49	870	161	448	5.48e-62	221	66.21
41752	XP_012135148.1	45.862	290	139	8	49	870	161	448	6.34e-62	221	66.21
41752	XP_004534049.4	42.321	293	149	6	49	873	579	869	6.43e-62	221	64.51
41752	XP_008185105.1	49.13	230	109	3	208	873	657	886	7.02e-62	220	72.61
41752	XP_011174601.1	46.32	231	114	4	208	870	34	264	7.92e-62	206	70.13
41752	XP_008182965.1	41.837	294	148	5	49	870	602	892	7.96e-62	221	64.97
41752	XP_017796734.1	46.154	286	140	6	52	870	186	470	8.23e-62	212	62.94
41752	XP_014217294.1	42.16	287	149	8	49	873	101	382	8.44e-62	209	64.46
41752	XP_014359627.1	44.912	285	145	5	49	870	158	441	1.05e-61	221	65.61
41752	XP_023952951.1	41.472	299	155	6	34	870	81	379	1.31e-61	216	65.22
41752	XP_017794325.1	46.021	289	141	8	49	873	596	883	1.31e-61	221	67.13
41752	XP_011694053.1	45.578	294	145	7	34	870	600	893	1.39e-61	220	68.03
41752	XP_021207652.1	44.014	284	146	4	55	867	387	670	1.83e-61	220	63.03
41752	XP_023293233.1	42.667	300	151	6	34	870	621	920	1.99e-61	220	65
41752	XP_014229554.2	41	300	155	8	40	873	593	892	2.09e-61	220	61
41752	XP_018372392.1	43.357	286	148	7	49	873	70	352	2.26e-61	207	66.08
41752	XP_008179896.1	49.13	230	109	3	208	873	270	499	2.33e-61	219	72.17
41752	XP_011699812.1	43.836	292	147	6	49	873	186	477	2.43e-61	219	65.75
41752	XP_020723247.1	41.924	291	154	8	40	873	121	409	2.78e-61	216	64.95
41752	XP_015377245.1	55.172	174	69	3	376	873	1	173	2.83e-61	201	75.86
41752	XP_022824808.1	44.702	302	152	8	7	867	692	993	3e-61	219	66.89
41752	XP_013183420.1	42.02	307	155	5	7	873	633	934	3.08e-61	219	60.26
41752	XP_013194101.1	42.02	307	155	5	7	873	633	934	3.11e-61	219	60.26
41752	XP_014359626.1	44.912	285	145	5	49	870	598	881	3.51e-61	219	65.61
41752	XP_022165896.1	41.781	292	150	6	49	873	361	649	3.66e-61	219	64.04
41752	XP_018394988.1	43.333	300	150	6	34	873	521	820	3.71e-61	218	64
41754	XP_002493080.1	63.265	49	16	1	38	184	231	277	0.000288	53.1	77.55
41758	XP_023015297.1	59.535	215	82	2	1	633	187	400	4.94e-77	259	73.49
41758	XP_017304968.1	56.744	215	89	1	1	633	438	652	9.94e-77	265	75.81
41758	XP_017304968.1	56.744	215	89	1	1	633	1220	1434	9.94e-77	265	75.81
41758	XP_008481775.1	56.744	215	89	1	1	633	614	828	1.22e-76	265	75.81
41758	XP_008481775.1	56.744	215	89	1	1	633	1376	1590	1.22e-76	265	75.81
41758	XP_008481775.1	56.744	215	89	1	1	633	2161	2375	1.22e-76	265	75.81
41758	XP_008481775.1	52.542	59	28	0	457	633	8	66	2e-11	75.5	77.97
41758	XP_008481774.1	56.744	215	89	1	1	633	68	282	1.23e-76	265	75.81
41758	XP_008481774.1	56.744	215	89	1	1	633	830	1044	1.23e-76	265	75.81
41758	XP_008481774.1	56.744	215	89	1	1	633	1592	1806	1.23e-76	265	75.81
41758	XP_008481774.1	56.744	215	89	1	1	633	2377	2591	1.23e-76	265	75.81
41758	XP_023936630.1	57.021	235	81	4	1	693	163	381	2.37e-75	254	70.21
41758	XP_014358561.1	53.509	228	101	2	1	672	227	453	9.03e-75	256	71.93
41758	XP_023018518.1	57.407	216	87	2	1	633	667	882	2.53e-71	249	71.3
41758	XP_002431503.1	56.938	209	85	2	10	624	223	430	2.76e-70	241	71.77
41758	XP_002431501.1	56.459	209	86	2	10	624	327	534	2.03e-69	241	71.77
41758	XP_021204964.1	53.488	215	95	2	1	633	735	948	1.13e-66	236	69.77
41758	XP_012151024.1	54.93	213	91	2	1	627	435	646	3.87e-66	234	70.89
41758	XP_021199718.1	46.468	269	134	4	1	789	83	347	2.22e-65	229	62.45
41758	XP_011686344.1	53.333	210	93	2	7	624	107	315	5.17e-64	226	69.52
41758	XP_011871824.1	52.632	209	94	2	10	624	108	315	1.23e-63	225	69.38
41758	XP_018402590.1	51.887	212	97	2	1	624	1474	1684	2.41e-63	226	71.23
41758	XP_011859426.1	48.707	232	114	2	7	690	459	689	1.39e-62	224	65.52
41758	XP_011868563.1	51.675	209	96	2	10	624	108	315	1.85e-62	218	69.38
41758	XP_011699787.1	51.415	212	98	2	1	624	105	315	7.87e-62	217	69.34
41758	XP_022819396.1	47.345	226	113	3	4	669	453	676	1.76e-61	221	68.14
41758	XP_022197181.1	47.17	212	107	3	1	624	312	522	2.57e-61	220	75
41758	XP_011871373.1	46.296	216	109	2	1	636	83	295	4.58e-61	215	67.13
41758	XP_011860867.1	50.476	210	99	2	7	624	979	1187	5.59e-61	219	68.1
41758	XP_018370156.1	48.305	236	112	4	1	693	716	946	6.03e-60	216	66.53
41758	XP_023018482.1	52.558	215	93	3	1	633	300	509	9.11e-59	213	67.44
41758	XP_020296374.1	47.222	216	109	2	1	636	590	804	2.3e-56	204	66.2
41758	XP_004988914.1	46.047	215	109	3	1	627	670	883	4.27e-56	205	63.72
41758	XP_017945898.1	46.667	210	106	2	13	624	958	1167	2.12e-55	203	64.76
41758	XP_002045008.1	42.795	229	126	2	1	675	69	296	2.63e-55	194	61.14
41758	XP_004920015.1	46.667	210	106	2	13	624	1277	1486	3.75e-55	202	64.76
41758	XP_023243879.1	48.402	219	106	3	1	639	952	1169	4.36e-55	202	66.67
41758	XP_018426179.1	48.095	210	104	2	13	627	563	772	6.74e-55	201	65.71
41758	XP_023218077.1	46.047	215	111	2	1	633	1088	1301	8.48e-55	201	69.3
41758	XP_017795781.1	45.283	212	111	2	1	624	279	489	1.05e-54	201	66.51
41758	XP_014299028.1	45.755	212	110	2	1	624	668	878	1.14e-54	201	67.92
41758	XP_018399455.1	49.738	191	91	2	1	561	584	773	2.15e-54	200	70.16
41758	XP_004910398.1	46.19	210	107	2	13	624	1277	1486	4.19e-54	199	64.29
41758	XP_004988912.1	44.66	206	107	3	1	600	394	598	5.83e-54	194	62.62
41758	XP_017949549.1	47.442	215	108	3	13	642	1205	1419	6.75e-54	199	66.51
41758	XP_015044798.1	46.89	209	106	3	10	624	383	590	9.87e-54	197	66.99
41758	XP_018939388.1	44.091	220	116	4	13	657	488	705	1.3e-53	195	62.73
41758	XP_011413197.1	45.909	220	114	2	1	648	120	338	2.24e-53	196	64.55
41758	XP_014300160.1	42.471	259	134	4	1	765	721	968	2.98e-53	197	62.55
41758	XP_014300160.1	44.545	220	117	2	1	648	1027	1245	1.62e-52	195	66.36
41758	XP_014300160.1	44	100	56	0	349	648	1321	1420	7.82e-19	97.4	65
41758	XP_015771838.1	46.479	213	102	4	13	624	1105	1314	3.62e-53	197	66.67
41758	XP_002045471.1	42.791	215	120	2	1	639	38	251	5.14e-53	182	61.86
41758	XP_014490494.1	43.439	221	121	2	1	660	757	974	1.51e-52	195	63.35
41758	XP_014429318.1	44.651	215	102	3	13	624	1175	1383	1.52e-52	195	63.72
41758	XP_004995507.1	42.342	222	119	3	1	642	133	353	2.25e-52	194	61.71
41758	XP_004995507.1	35.135	222	102	4	1	642	1204	1391	3.24e-34	142	50.9
41758	XP_009771167.1	45.133	226	118	2	1	678	256	475	2.66e-52	193	62.83
41758	XP_016852022.1	46.009	213	105	3	13	627	1091	1301	3.26e-52	194	66.67
41758	XP_017326732.1	45.366	205	107	3	13	612	880	1084	3.3e-52	194	65.85
41758	XP_008109412.1	45.714	210	108	2	13	624	1238	1447	3.93e-52	194	64.29
41758	XP_014434980.1	41.736	242	129	4	13	723	495	729	8.48e-52	192	59.92
41758	XP_017326725.1	45.771	201	104	3	13	600	823	1023	1.11e-51	192	67.16
41758	XP_019219861.1	44.976	209	111	1	13	627	1286	1494	1.18e-51	192	66.03
41758	XP_021324313.1	44.495	218	113	2	1	633	821	1037	1.49e-51	192	63.76
41758	XP_022528993.1	43.541	209	113	2	13	624	977	1185	1.82e-51	192	65.55
41758	XP_002045134.1	41.964	224	121	3	22	681	4	222	1.87e-51	181	60.71
41758	XP_019204294.1	44.978	229	117	3	13	678	1148	1374	2.92e-51	191	61.14
41758	XP_016854393.1	45.238	210	109	2	13	624	740	949	2.93e-51	191	63.81
41758	XP_019204289.1	44.978	229	117	3	13	678	1258	1484	6.69e-51	190	61.14
41758	XP_019928508.1	46.919	211	103	3	13	624	1004	1212	1.01e-50	190	64.45
41758	XP_011445603.1	46.919	211	103	3	13	624	999	1207	1.03e-50	190	64.45
41758	XP_023314892.1	43.578	218	117	3	4	642	1022	1238	1.06e-50	190	64.22
41758	XP_011445602.1	46.919	211	103	3	13	624	1010	1218	1.09e-50	189	64.45
41758	XP_011415578.1	46.919	211	103	3	13	624	1010	1218	1.1e-50	189	64.45
41758	XP_011415579.1	46.919	211	103	3	13	624	999	1207	1.1e-50	189	64.45
41758	XP_014436125.1	44.186	215	109	3	4	624	816	1027	1.23e-50	189	62.79
41758	XP_011451618.1	46.919	211	103	3	13	624	978	1186	3.01e-50	188	64.45
41758	XP_017245360.1	43.779	217	120	1	1	651	570	784	4.43e-50	188	63.59
41758	XP_021325913.1	45.283	212	107	4	13	627	1116	1325	4.99e-50	188	65.57
41758	XP_002786362.1	41.86	215	116	4	7	630	83	295	5.14e-50	178	63.26
41758	XP_014208619.1	46.19	210	108	3	10	627	858	1066	5.78e-50	187	64.76
41758	XP_022307941.1	46.19	210	108	3	13	627	1072	1281	5.81e-50	187	64.29
41758	XP_002044921.1	41.892	222	120	3	31	684	39	255	7.2e-50	179	60.81
41758	XP_018967376.1	43.81	210	113	3	13	627	1127	1336	7.34e-50	187	63.81
41758	XP_023758759.1	48.792	207	105	1	1	621	22	227	9.27e-50	184	61.35
41758	XP_019202928.1	44.131	213	114	2	4	627	1056	1268	1.17e-49	187	63.38
41758	XP_002783703.1	41.395	215	117	4	7	630	83	295	1.32e-49	177	63.26
41758	XP_012259267.2	46.445	211	88	3	1	618	50	240	2.22e-49	185	63.98
41758	XP_023730172.1	47.17	212	111	1	1	636	195	405	2.5e-49	184	62.74
41758	XP_023734788.1	47.17	212	111	1	1	636	195	405	2.58e-49	184	62.74
41758	XP_008280394.1	44.019	209	107	3	13	624	715	918	2.94e-49	185	59.81
41758	XP_011863867.1	54.268	164	70	2	145	624	1	163	3.13e-49	177	71.34
41758	XP_017945894.1	44.762	210	110	2	13	624	1133	1342	4.57e-49	185	60
41758	XP_021995608.1	45.755	212	109	3	1	630	790	997	5.2e-49	185	66.51
41758	XP_024024005.1	43.269	208	116	1	1	624	737	942	6.08e-49	184	66.83
41758	XP_021848201.1	44.175	206	113	1	10	627	777	980	6.41e-49	184	65.05
41758	XP_006822441.1	45.238	210	109	2	13	624	848	1057	6.6e-49	184	62.86
41758	XP_011292967.2	44.7	217	107	3	10	636	762	973	8.06e-49	184	60.83
41758	XP_011292967.2	43.318	217	108	4	10	636	388	597	7.85e-46	176	60.37
41758	XP_023812443.1	43.662	213	115	2	13	636	955	1167	8.57e-49	184	63.38
41758	XP_022200036.1	43.878	196	105	2	1	576	186	380	8.82e-49	184	68.88
41758	XP_015831998.1	44.019	209	113	1	13	627	785	993	1.21e-48	184	64.59
41758	XP_023950257.1	46.948	213	102	3	7	624	750	958	1.41e-48	183	61.03
41758	XP_010491426.2	43.961	207	114	1	10	630	882	1086	1.48e-48	184	65.22
41758	XP_010315745.1	46.569	204	108	1	13	624	854	1056	1.57e-48	183	66.67
41758	XP_023807869.1	43.662	213	115	2	13	636	1056	1268	2.01e-48	183	63.38
41758	XP_020220971.1	44.231	208	108	2	10	624	301	503	2.55e-48	182	66.83
41758	XP_013980415.1	40.417	240	130	3	4	708	1163	1394	2.73e-48	183	60.83
41758	XP_006821682.1	44.39	205	109	2	25	624	3	207	2.99e-48	175	60.98
41758	XP_021346951.1	45.024	211	111	2	10	627	1243	1453	3.43e-48	182	63.98
41760	XP_017473031.1	67.241	174	57	0	419	940	1	174	1.54e-80	253	79.31
41760	XP_017473177.1	67.241	174	57	0	419	940	1	174	3.22e-80	252	79.31
41760	WP_048819153.1	69.939	163	49	0	419	907	1	163	1.01e-78	246	81.6
41760	XP_008547924.1	51.176	170	81	1	428	937	5	172	6.09e-51	183	66.47
41760	XP_011858480.1	51.25	160	74	2	467	940	7	164	2.77e-44	166	68.75
41760	XP_014614841.1	48.366	153	79	0	443	901	96	248	1.84e-43	164	69.28
41760	XP_015437864.1	44.828	174	94	1	419	940	1	172	2.8e-43	164	64.94
41760	XP_017794534.1	48.171	164	82	1	428	910	5	168	4.38e-43	160	64.02
41760	XP_014484751.1	43.678	174	96	1	416	937	1	172	1.81e-42	157	62.07
41760	XP_008185317.1	38.728	173	104	1	422	940	10	180	1.66e-39	152	67.63
41760	XP_018405166.1	52.756	127	58	1	524	898	101	227	9.57e-36	144	69.29
41760	XP_018402099.1	50	130	63	1	515	898	1	130	1.24e-35	140	66.92
41760	XP_016660583.1	43.59	156	88	0	434	901	20	175	6.44e-35	139	60.26
41760	XP_015438121.1	41.509	159	93	0	425	901	5	163	3.11e-34	142	60.38
41760	XP_012234580.1	37.791	172	105	1	425	940	4	173	1.52e-33	135	58.72
41760	XP_017853930.1	38.889	162	99	0	416	901	2	163	1.27e-32	136	58.64
41760	XP_008185316.1	39.583	144	87	0	422	853	10	153	4.5e-32	132	68.06
41760	XP_011063431.1	45.312	128	70	0	515	898	1	128	3.43e-31	129	64.84
41760	XP_017092979.1	40.845	142	82	1	515	940	1	140	4.67e-30	125	60.56
[truncated: 1,072 more rows]
